# Supplementary material for: Asymmetric synthesis of N,O-heterocycles via enantioselective iridium-catalysed intramolecular allylic amidation
Source: Royal Society of Chemistry journal article supplement (doi:10.1039/c4sc01940g), 2014-07-21
Supplement: c4sc01940g1.pdf [file c4sc01940g1.pdf]

## Supporting Information

### Asymmetric Synthesis of *N,O*-Heterocycles via Enantioselective Iridium-Catalysed Intramolecular Allylic Amidation

*Depeng Zhao, Martín Fañanás-Mastral, Mu-Chieh Chang, Edwin Otten, and Ben L. Feringa\**

Stratingh Institute for Chemistry, University of Groningen, Nijenborgh 4, 9747 AG, Groningen,

The Netherlands.

E-mail: b.l.feringa@rug.nl

### Table of Contents

|                                                                                              |         |
|----------------------------------------------------------------------------------------------|---------|
| General remarks .....                                                                        | S2      |
| Procedures for the synthesis of allylic carbonates 1.....                                    | S2      |
| General Procedure for the Iridium-catalyzed asymmetric allylic cyclization of 1a to 1n.....  | S10-S16 |
| General Procedure for the Iridium-catalyzed asymmetric allylic cyclization of 1o and 1p..... | S16-S17 |
| Procedure for cross metathesis of 2a.....                                                    | S18     |
| Procedure for the addition of organolithium reagent to benzoxazine.....                      | S18-S21 |
| X-ray analysis of 2m and 4a: determination of relative and absolute configuration.....       | S21-S22 |
| Determination of the relative configuration of 4a and 4d by NOESY.....                       | S23     |
| Copies of NMR spectra.....                                                                   | S24-S44 |
| Copies of HPLC results.....                                                                  | S45-S62 |

## General remarks

Column chromatography was performed on silica gel (Silica-P flash silica gel from Silicycle, size 40-63  $\mu\text{m}$ ). TLC was performed on silica gel 60/Kieselguhr F254. Components were visualized by UV and stained with a solution of a mixture of  $\text{KMnO}_4$  (10 g) and  $\text{K}_2\text{CO}_3$  (10 g) in  $\text{H}_2\text{O}$  (500 mL). Mass spectra were recorded on a AEI-MS-902 mass spectrometer (EI+) or a LTQ Orbitrap XL (ESI+).  $^1\text{H}$  and  $^{13}\text{C}$  NMR were recorded on a Varian AMX400 (400 and 100.6 MHz, respectively) or a Varian Unity Plus Varian-500 (500 and 125 MHz, respectively) using  $\text{CDCl}_3$  as solvent. Chemical shift values are reported in ppm with the solvent resonance as the internal standard ( $\text{CHCl}_3$ :  $\delta$  7.26 for  $^1\text{H}$ ,  $\delta$  77.0 for  $^{13}\text{C}$ ; acetone:  $\delta$  2.05 for  $^1\text{H}$ ,  $\delta$  29.8 ppm for  $^{13}\text{C}$ ). Data are reported as follows: chemical shifts, multiplicity (s = singlet, d = doublet, t = triplet, q = quartet, br = broad, m = multiplet), coupling constants (Hz), and integration. Optical rotations were measured in  $\text{CHCl}_3$  on a *Schmidt + Haensch* polarimeter (Polartronic MH8) with a 10 cm cell ( $c$  given in g/100 mL). Conversions were determined by  $^1\text{H}$  NMR. Enantioselectivities were determined by HPLC analysis using a Shimadzu LC-10ADVP HPLC equipped with a Shimadzu SPD-M10AVP diode array detector or by capillary GC analysis. Melting points were determined on a Buchi B-545 melting point apparatus. All reactions were carried out under a nitrogen atmosphere using oven dried glassware and using standard Schlenk techniques.  $\text{CH}_2\text{Cl}_2$  was dried and distilled over calcium hydride. THF and  $\text{Et}_2\text{O}$  were dried and distilled over Na/benzophenone.  $[\text{Ir}(\text{COD})\text{Cl}]_2$  was purchased from Strem Chemicals, Inc. Ligand L7 and L8 were prepared according to literature.<sup>1</sup>

## Procedures for the synthesis of allylic carbonates 1:

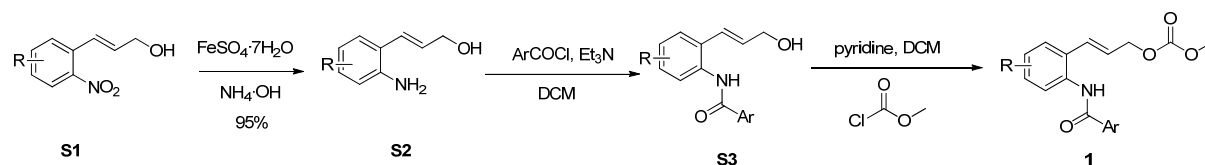

Representative procedure for the synthesis of allylic carbonate **1a**.

The amino alcohol **S2a** was prepared following a literature procedure.<sup>[2]</sup> A mixture of o-nitrocinnamyl alcohol **S1a** (1.7 g, 9.5 mmol) and  $\text{FeSO}_4 \cdot 7\text{H}_2\text{O}$  (25.0 g, 90.9 mmol) in a mixture of methanol (100 mL) and conc. aqueous ammonium hydroxide (120 mL) was heated at 80  $^\circ\text{C}$  for 3 h. After cooling to room temperature, the mixture was extracted with  $\text{DCM}$  (6 $\times$ 50 mL). The combined organic solution was dried over  $\text{Na}_2\text{SO}_4$  and the solvent evaporated. The residue was purified by chromatography (3 : 7 pentane– $\text{EtOAc}$ ) to give **S2a** (1.41 g, 95%) as a light brown solid.

To a solution of **S2a** (1.49 g, 10 mmol) and  $\text{Et}_3\text{N}$  (4.2 mL, 30 mmol) in dry  $\text{CH}_2\text{Cl}_2$  (50 mL) was added dropwise benzoyl chloride (3.5 mL, 30 mmol) at 0  $^\circ\text{C}$ . The mixture was stirred at room temperature for 12 h. The solvent was removed under vacuum and the residue was dissolved in a mixture of THF (40 mL), MeOH (40 mL) and 1 N aq. NaOH (40 mL). The mixture was then stirred at room temperature for 2 h to hydrolyze the benzoic ester. After

[1] W.-B. Liu, C. Zheng, C.-X. Zhuo, L.-X. Dai, S.-L. You, *J. Am. Chem. Soc.*, **2012**, 134, 4812.

[2] J. M. Cuerva, D. J. Cárdenas, A. M. Echavarren, *J. Chem. Soc., Perkin Trans. 1*, **2002**, 1360.

extraction with CH<sub>2</sub>Cl<sub>2</sub> (3 x 50 mL), the combined organic layers were washed with brine, dried over Na<sub>2</sub>SO<sub>4</sub> and concentrated under vacuum. The residue was purified by chromatography (1 : 1 pentane–EtOAc) to give **S3a** as light brown solid in 85% yield.

To a solution of allyl alcohol **S3a** (1.68 g, 6.6 mmol) and pyridine (1.65 mL, 3 equiv) in CH<sub>2</sub>Cl<sub>2</sub> (50 mL), methyl chloroformate (1.0 mL, 2 equiv) was added dropwise at 0 °C. The reaction mixture was allowed to warm to room temperature and subsequently stirred for 1 h. Upon completion, the reaction mixture was diluted with CH<sub>2</sub>Cl<sub>2</sub> (50 mL) and washed with aq. HCl (2N) (3 x 40 mL). The organic layer was dried over Na<sub>2</sub>SO<sub>4</sub> and concentrated under vacuum. The residue was purified by chromatography (3 : 1 pentane–EtOAc) to give **1a** as a light brown solid in 99% yield.

The other allylic carbonates **1** were synthesized in accordance with the representative procedures for **1a**.

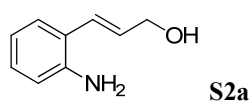

**(E)-3-(2-Aminophenyl)prop-2-en-1-ol (S2a)**

<sup>1</sup>H NMR (400 MHz, CDCl<sub>3</sub>) δ = 7.25 (d, *J* = 8.2 Hz, 1H), 7.08 (td, *J* = 8.0, 1.4 Hz, 1H), 6.76 (t, *J* = 7.4 Hz, 1H), 6.71 – 6.60 (m, 2H), 6.22 (dt, *J* = 15.7, 5.6 Hz, 1H), 4.30 (dd, *J* = 5.6, 1.5 Hz, 2H), 3.63 (brs, 2H).

<sup>13</sup>C NMR (101 MHz, CDCl<sub>3</sub>) δ = 143.6, 130.2, 128.6, 127.4, 126.4, 123.1, 119.0, 116.2, 63.7.

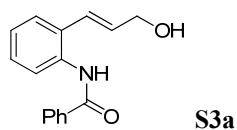

**(E)-N-(2-(3-Hydroxyprop-1-en-1-yl)phenyl)benzamide (S3a)**

<sup>1</sup>H NMR (400 MHz, CDCl<sub>3</sub>) δ 7.94 (s, 1H), 7.89 (d, *J* = 7.2 Hz, 3H), 7.56 (t, *J* = 7.4 Hz, 1H), 7.49 (t, *J* = 7.4 Hz, 2H), 7.43 (d, *J* = 7.7 Hz, 1H), 7.32 (td, *J* = 8.1, 1.3 Hz, 1H), 7.19 (t, *J* = 7.2 Hz, 1H), 6.73 (d, *J* = 15.8 Hz, 1H), 6.29 (dt, *J* = 15.8, 5.3 Hz, 1H), 4.31 (dd, *J* = 5.3, 1.6 Hz, 2H), 2.11 (brs, 1H).

<sup>13</sup>C NMR (101 MHz, CDCl<sub>3</sub>) δ 166.0, 134.6, 134.4, 132.9, 131.9, 130.1, 128.2, 128.4, 127.2, 127.1, 125.7, 125.5, 124.1, 63.4.

HRMS (ESI<sup>+</sup>, *m/z*) calculated for C<sub>16</sub>H<sub>16</sub>NO<sub>2</sub> [M + H]<sup>+</sup> 254.1176; found 254.1172.

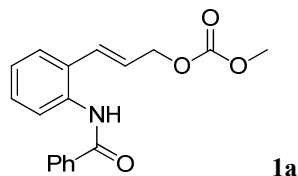

**(E)-3-(2-Benzamidophenyl)allyl methyl carbonate (1a)**

<sup>1</sup>H NMR (400 MHz, CDCl<sub>3</sub>) δ = 7.97 (d, *J* = 8.1 Hz, 1H), 7.96 – 7.85 (m, 3H), 7.57 (t, *J* = 7.5 Hz, 1H), 7.57 – 7.45 (m, 2H), 7.42 (d, *J* = 7.8, 1H), 7.34 (td, *J* = 7.6, 1.6 Hz, 1H), 7.18 (t, *J* = 7.5 Hz, 1H), 6.84 (d, *J* = 15.8 Hz, 1H), 6.22 (dt, *J* = 15.8, 6.3 Hz, 1H), 4.79 (dd, *J* = 6.3, 1.4 Hz, 2H), 3.77 (s, 3H).

<sup>13</sup>C NMR (101 MHz, CDCl<sub>3</sub>) δ = 165.6, 155.6, 134.7, 134.5, 131.9, 130.0, 129.2, 128.9, 128.8, 127.3, 127.2, 126.9, 125.5, 123.8, 68.1, 54.8.

HRMS (ESI<sup>+</sup>, *m/z*) calculated for C<sub>18</sub>H<sub>18</sub>NO<sub>4</sub> [M + H]<sup>+</sup> 312.1230; found 312.1229.

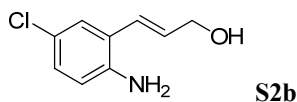

**(*E*)-3-(2-Amino-5-chlorophenyl)prop-2-en-1-ol (S2b)**

<sup>1</sup>H NMR (400 MHz, CDCl<sub>3</sub>) δ = 7.22 (d, *J* = 2.4 Hz, 1H), 7.02 (dd, *J* = 8.5, 2.4 Hz, 1H), 6.62 (s, 1H), 6.59 (d, *J* = 5.7 Hz, 1H), 6.24 (dt, *J* = 15.7, 5.4 Hz, 1H), 4.34 (dd, *J* = 5.4, 1.6 Hz, 2H), 2.86 (s, 3H).

<sup>13</sup>C NMR (101 MHz, CDCl<sub>3</sub>) δ = 142.2, 131.5, 128.3, 127.0, 125.2, 124.5, 123.6, 117.2, 63.6.

HRMS (ESI<sup>+</sup>, *m/z*) calculated for C<sub>9</sub>H<sub>11</sub>ClNO [M + H]<sup>+</sup> 184.0524; found 184.0528.

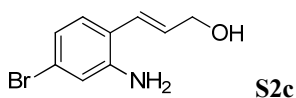

**(*E*)-3-(2-Amino-4-bromophenyl)prop-2-en-1-ol (S2c)**

<sup>1</sup>H NMR (400 MHz, CDCl<sub>3</sub>) δ = 7.09 (d, *J* = 8.2 Hz, 1H), 6.86 (dd, *J* = 8.2, 1.9 Hz, 1H), 6.83 (d, *J* = 1.9 Hz, 1H), 6.58 (d, *J* = 15.7 Hz, 1H), 6.22 (dt, *J* = 15.7, 5.5 Hz, 1H), 4.32 (dd, *J* = 5.5, 1.6 Hz, 2H).

<sup>13</sup>C NMR (101 MHz, CDCl<sub>3</sub>) δ = 144.9, 130.9, 128.8, 125.5, 122.0, 121.9, 121.8, 118.5, 63.7.

HRMS (ESI<sup>+</sup>, *m/z*) calculated for C<sub>9</sub>H<sub>11</sub>BrNO [M + H]<sup>+</sup> 228.0019; found 228.0025.

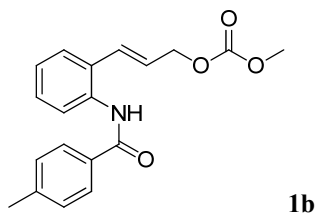

**(*E*)-Methyl (3-(2-(4-methylbenzamido)phenyl)allyl) carbonate (1b)**

<sup>1</sup>H NMR (400 MHz, CDCl<sub>3</sub>) δ = 7.98 (d, *J* = 8.1 Hz, 1H), 7.82 (brs, 1H), 7.81 (d, *J* = 8.1 Hz, 2H), 7.42 (d, *J* = 7.7 Hz, 1H), 7.34 (t, *J* = 7.8 Hz, 1H), 7.30 (d, *J* = 8.0 Hz, 2H), 7.18 (t, *J* = 7.2 Hz, 1H), 6.84 (d, *J* = 15.8 Hz, 1H), 6.22 (dt, *J* = 15.8, 6.3 Hz, 1H), 4.79 (dd, *J* = 6.3, 1.2 Hz, 2H), 3.78 (s, 3H), 2.43 (s, 3H).

<sup>13</sup>C NMR (101 MHz, CDCl<sub>3</sub>) δ = 165.5, 155.6, 142.5, 134.9, 131.7, 130.1, 129.5, 129.1, 129.0, 127.3, 127.2, 126.9, 125.4, 123.7, 68.2, 54.9, 21.5.

HRMS (ESI<sup>+</sup>, *m/z*) calculated for C<sub>19</sub>H<sub>20</sub>NO<sub>4</sub> [M + H]<sup>+</sup> 326.1387; found 326.1385.

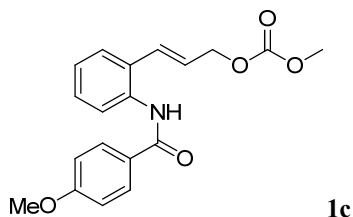

**(E)-3-(2-(4-Methoxybenzamido)phenyl)allyl methyl carbonate (1c)**

$^1\text{H}$  NMR (400 MHz,  $\text{CDCl}_3$ )  $\delta$  = 7.95 (d,  $J$  = 8.0 Hz, 1H), 7.88 (d,  $J$  = 8.8 Hz, 2H), 7.82 (brs, 1H), 7.41 (d,  $J$  = 7.7 Hz, 1H), 7.33 (t,  $J$  = 7.7 Hz, 1H), 7.16 (t,  $J$  = 7.5 Hz, 1H), 6.98 (d,  $J$  = 8.8 Hz, 2H), 6.84 (d,  $J$  = 15.8 Hz, 1H), 6.21 (dt,  $J$  = 15.8, 6.3 Hz, 1H), 4.78 (dd,  $J$  = 6.3, 1.2 Hz, 2H), 3.87 (s, 3H), 3.78 (s, 3H).

$^{13}\text{C}$  NMR (101 MHz,  $\text{CDCl}_3$ )  $\delta$  = 165.1, 162.6, 155.6, 135.0, 130.2, 129.0<sup>9</sup>, 129.0<sup>6</sup>, 128.9, 127.3, 126.7, 126.7, 125.3, 123.8, 114.0, 68.2, 55.4, 54.8.

HRMS (ESI<sup>+</sup>,  $m/z$ ) calculated for  $\text{C}_{19}\text{H}_{20}\text{NO}_5$   $[\text{M} + \text{H}]^+$  342.1336; found 342.1333.

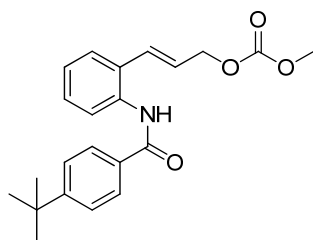

**(E)-3-(2-(4-(tert-butyl)benzamido)phenyl)allyl methyl carbonate (1d)**

$^1\text{H}$  NMR (400 MHz,  $\text{CDCl}_3$ )  $\delta$  = 7.97 (d,  $J$  = 8.0 Hz, 1H), 7.89 (brs, 1H), 7.86 (d,  $J$  = 8.1 Hz, 2H), 7.52 (d,  $J$  = 8.0 Hz, 2H), 7.41 (d,  $J$  = 7.6 Hz, 1H), 7.33 (t,  $J$  = 7.6 Hz, 1H), 7.17 (t,  $J$  = 7.4 Hz, 1H), 6.84 (d,  $J$  = 15.8 Hz, 1H), 6.22 (dt,  $J$  = 12.9, 6.1 Hz, 1H), 4.79 (d,  $J$  = 6.1 Hz, 2H), 3.78 (s, 3H), 1.36 (s, 9H).

$^{13}\text{C}$  NMR (101 MHz,  $\text{CDCl}_3$ )  $\delta$  = 165.5, 162.6, 155.5, 134.9, 131.6, 130.1, 129.1, 128.9, 127.3, 127.0, 126.8, 125.73, 125.4, 123.8, 68.2, 54.8, 35.0, 31.1.

HRMS (ESI<sup>+</sup>,  $m/z$ ) calculated for  $\text{C}_{22}\text{H}_{26}\text{NO}_4$   $[\text{M} + \text{H}]^+$  368.1856; found 368.1852.

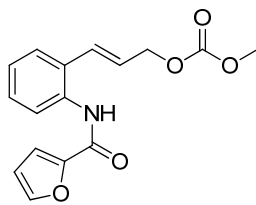

**(E)-3-(2-(Furan-2-carboxamido)phenyl)allyl methyl carbonate (1e)**

$^1\text{H}$  NMR (400 MHz,  $\text{CDCl}_3$ )  $\delta$  = 8.11 (brs, 1H), 8.00 (d,  $J$  = 8.1 Hz, 1H), 7.54 (s, 1H), 7.42 (d,  $J$  = 7.7 Hz, 1H), 7.33 (t,  $J$  = 7.4 Hz, 1H), 7.25 (d,  $J$  = 3.5 Hz, 1H), 7.17 (t,  $J$  = 7.6 Hz, 1H), 6.84 (d,  $J$  = 15.8 Hz, 1H), 6.57 (dd,  $J$  = 3.3, 1.6 Hz, 1H), 6.26 (dt,  $J$  = 15.8, 6.3 Hz, 1H), 4.82 (d,  $J$  = 6.3 Hz, 2H), 3.80 (s, 3H).

$^{13}\text{C}$  NMR (101 MHz,  $\text{CDCl}_3$ )  $\delta$  = 156.1, 155.5, 147.7, 144.4, 134.0, 129.6, 128.9, 128.7, 127.4, 126.9, 125.4, 123.4, 115.4, 112.6, 68.2, 54.9.

HRMS (ESI<sup>+</sup>,  $m/z$ ) calculated for  $\text{C}_{16}\text{H}_{16}\text{NO}_5$   $[\text{M} + \text{H}]^+$  302.1023; found 302.1024.

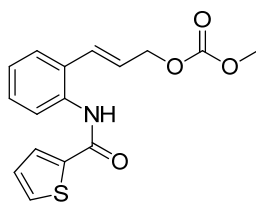

**(E)-Methyl (3-(2-(thiophene-2-carboxamido)phenyl)allyl) carbonate (1f)**

$^1\text{H}$  NMR (400 MHz,  $\text{CDCl}_3$ )  $\delta$  7.90 (d,  $J$  = 8.0 Hz, 1H), 7.83 (brs, 1H), 7.68 (d,  $J$  = 3.4 Hz, 1H), 7.55 (dd,  $J$  = 5.0, 0.8 Hz, 1H), 7.40 (d,  $J$  = 7.7 Hz, 1H), 7.31 (t,  $J$  = 7.7 Hz, 1H), 7.17 (t,  $J$  = 7.4 Hz, 1H), 7.12 (dd,  $J$  = 4.9, 3.8 Hz, 1H), 6.83 (d,  $J$  = 15.8 Hz, 1H), 6.20 (dt,  $J$  = 15.8, 6.3 Hz, 1H), 4.78 (dd,  $J$  = 6.3, 1.2 Hz, 2H), 3.78 (s, 3H).

$^{13}\text{C}$  NMR (101 MHz,  $\text{CDCl}_3$ )  $\delta$  = 160.0, 155.6, 139.0, 134.4, 130.9, 130.1, 129.1, 128.9, 128.6, 127.8, 127.3, 126.8, 125.6, 123.9, 68.1, 54.8.

HRMS (ESI+,  $m/z$ ) calculated for  $\text{C}_{16}\text{H}_{16}\text{NO}_5$   $[\text{M} + \text{H}]^+$  318.0795; found 318.0796.

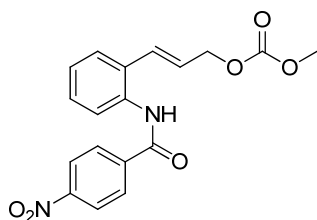

**1g**

**(E)-Methyl (3-(2-(4-nitrobenzamido)phenyl)allyl) carbonate (1g)**

$^1\text{H}$  NMR (400 MHz, acetone)  $\delta$  9.65 (s, 1H), 8.42 (d,  $J$  = 8.8 Hz, 2H), 8.32 (d,  $J$  = 8.7 Hz, 2H), 7.70 (d,  $J$  = 7.7 Hz, 1H), 7.65 (d,  $J$  = 7.8 Hz, 1H), 7.40 (td,  $J$  = 7.7, 1.3 Hz, 1H), 7.33 (t,  $J$  = 7.2 Hz, 1H), 7.06 (d,  $J$  = 15.9 Hz, 1H), 6.39 (dt,  $J$  = 15.8, 6.3 Hz, 1H), 4.79 (dd,  $J$  = 6.3, 1.2 Hz, 2H), 3.76 (s, 3H).

$^{13}\text{C}$  NMR (101 MHz, acetone)  $\delta$  = 165.9, 157.1, 151.4, 142.3, 136.8, 133.6, 131.3, 130.7, 130.0, 128.4, 128.2, 128.0, 126.9, 125.1, 69.5, 55.8.

HRMS (ESI+,  $m/z$ ) calculated for  $\text{C}_{18}\text{H}_{17}\text{N}_2\text{O}_6$   $[\text{M} + \text{H}]^+$  357.1081; found 357.1078.

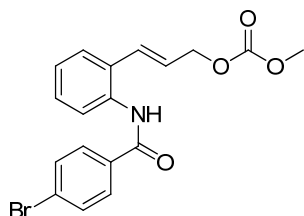

**1h**

**(E)-3-(2-(4-Bromobenzamido)phenyl)allyl methyl carbonate (1h)**

$^1\text{H}$  NMR (400 MHz,  $\text{CDCl}_3$ )  $\delta$  = 7.96 (d,  $J$  = 8.1 Hz, 1H), 7.84 (brs, 1H), 7.79 (d,  $J$  = 8.4 Hz, 2H), 7.64 (d,  $J$  = 8.4 Hz, 2H), 7.41 (d,  $J$  = 7.7 Hz, 1H), 7.35 (t,  $J$  = 7.8 Hz, 1H), 7.19 (t,  $J$  = 7.6 Hz, 1H), 6.82 (d,  $J$  = 15.8 Hz, 1H), 6.20 (dt,  $J$  = 15.8, 6.3 Hz, 1H), 4.79 (dd,  $J$  = 6.3, 0.9 Hz, 2H), 3.78 (s, 3H).

$^{13}\text{C}$  NMR (101 MHz,  $\text{CDCl}_3$ )  $\delta$  = 164.7, 155.6, 134.5, 133.3, 132.0, 130.1, 129.2, 129.0, 128.8, 127.4, 127.2, 126.7, 125.7, 123.7, 68.1, 54.9.

HRMS (ESI+,  $m/z$ ) calculated for  $\text{C}_{16}\text{H}_{13}\text{BrNO}$   $[\text{M} - \text{OCOOMe}]^+$  314.0175; found 314.0178.

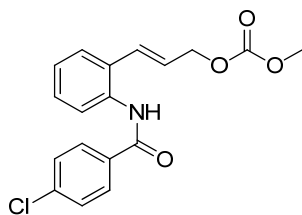

**1i**

**(*E*)-3-(2-(4-Chlorobenzamido)phenyl)allyl methyl carbonate (1i)**

$^1\text{H}$  NMR (400 MHz,  $\text{CDCl}_3$ )  $\delta$  7.93 (d,  $J$  = 8.1 Hz, 1H), 7.88 (brs, 1H), 7.85 (d,  $J$  = 8.5 Hz, 2H), 7.46 (d,  $J$  = 8.5 Hz, 2H), 7.41 (d,  $J$  = 7.7 Hz, 1H), 7.34 (dd,  $J$  = 11.1, 4.4 Hz, 1H), 7.19 (t,  $J$  = 7.5 Hz, 1H), 6.82 (d,  $J$  = 15.8 Hz, 1H), 6.20 (dt,  $J$  = 15.8, 6.3 Hz, 1H), 4.78 (dd,  $J$  = 6.3, 1.1 Hz, 2H), 3.78 (s, 3H).

$^{13}\text{C}$  NMR (101 MHz,  $\text{CDCl}_3$ )  $\delta$  = 164.6, 155.6, 138.2, 134.5, 132.8, 130.1, 129.3, 129.0, 129.0, 128.7, 127.3, 127.1, 125.7, 123.8, 68.1, 54.9.

HRMS (ESI+,  $m/z$ ) calculated for  $\text{C}_{16}\text{H}_{13}\text{ClNO}$  [ $\text{M} - \text{OCOOMe}$ ] $^+$  270.0680; found 270.0682.

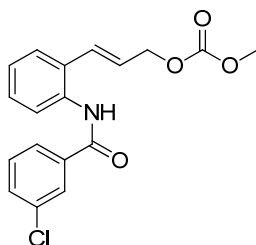

**1j**

**(*E*)-3-(2-(3-Chlorobenzamido)phenyl)allyl methyl carbonate (1j)**

$^1\text{H}$  NMR (201 MHz,  $\text{CDCl}_3$ )  $\delta$  8.02 – 7.83 (m, 3H), 7.78 (d,  $J$  = 7.6 Hz, 1H), 7.61 – 7.27 (m, 4H), 7.20 (t,  $J$  = 7.5 Hz, 1H), 6.83 (d,  $J$  = 15.8 Hz, 1H), 6.20 (dt,  $J$  = 15.8, 6.3 Hz, 1H), 4.78 (d,  $J$  = 6.2 Hz, 3H), 3.77 (s, 3H).

$^{13}\text{C}$  NMR (101 MHz,  $\text{CDCl}_3$ )  $\delta$  = 164.7, 155.4, 134.8, 134.2, 131.7, 130.5, 130.4, 130.3, 129.6, 129.4, 128.8, 127.3, 127.0, 126.6, 125.9, 124.2, 68.0, 54.8.

HRMS (ESI+,  $m/z$ ) calculated for  $\text{C}_{18}\text{H}_{17}\text{ClNO}_4$  [ $\text{M} + \text{H}$ ] $^+$  346.0841; found 346.0837.

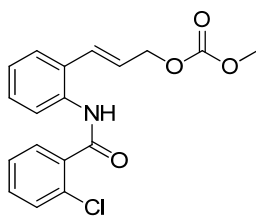

**1k**

**(*E*)-3-(2-(2-chlorobenzamido)phenyl)allyl methyl carbonate (1k)**

$^1\text{H}$  NMR (400 MHz,  $\text{CDCl}_3$ )  $\delta$  = 7.96 (d,  $J$  = 7.7 Hz, 1H), 7.90 (s, 1H), 7.82 (d,  $J$  = 5.1 Hz, 1H), 7.53 – 7.30 (m, 5H), 7.21 (t,  $J$  = 7.2 Hz, 1H), 6.91 (d,  $J$  = 15.6 Hz, 1H), 6.23 (dt,  $J$  = 15.5, 5.9 Hz, 1H), 4.79 (d,  $J$  = 5.8 Hz, 2H), 3.77 (s, 3H).

$^{13}\text{C}$  NMR (101 MHz,  $\text{CDCl}_3$ )  $\delta$  = 164.5, 155.5, 136.2, 134.9, 134.3, 131.9, 129.9<sup>9</sup>, 129.9<sup>6</sup>, 129.7, 128.9, 127.6, 127.2, 126.7, 125.9, 125.2, 124.3, 68.1, 54.8.

HRMS (ESI+,  $m/z$ ) calculated for  $C_{18}H_{17}ClNO_4$   $[M + H]^+$  346.0841; found 346.0836.

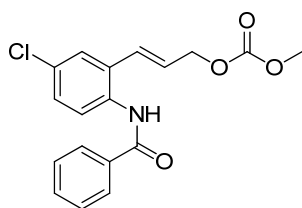

**1l**

**(*E*)-3-(2-Benzamido-5-chlorophenyl)allyl methyl carbonate (1l)**

$^1H$  NMR (400 MHz,  $CDCl_3$ )  $\delta$  = 7.97 – 7.82 (m, 4H), 7.57 (t,  $J$  = 7.4 Hz, 1H), 7.49 (t,  $J$  = 7.4 Hz, 2H), 7.38 (d,  $J$  = 2.4 Hz, 1H), 7.27 (dd,  $J$  = 8.6, 2.5 Hz, 1H), 6.75 (d,  $J$  = 15.8 Hz, 1H), 6.20 (dt,  $J$  = 15.7, 6.1 Hz, 1H), 4.76 (dd,  $J$  = 6.1, 1.4 Hz, 2H), 3.76 (s, 3H).

$^{13}C$  NMR (101 MHz,  $CDCl_3$ )  $\delta$  = 165.6, 155.5, 134.1, 133.3, 132.1, 130.9, 130.8, 128.8, 128.7, 128.6, 128.0, 127.2, 127.0, 125.2, 67.7, 54.9.

HRMS (ESI+,  $m/z$ ) calculated for  $C_{18}H_{17}ClNO_4$   $[M + H]^+$  346.0841; found 346.0844.

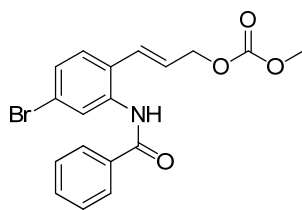

**1m**

**(*E*)-3-(2-Benzamido-4-bromophenyl)allyl methyl carbonate (1m)**

$^1H$  NMR (400 MHz,  $CDCl_3$ )  $\delta$  = 8.25 (s, 1H), 8.00 – 7.81 (m, 3H), 7.58 (t,  $J$  = 7.4 Hz, 1H), 7.50 (t,  $J$  = 7.3 Hz, 2H), 7.34 – 7.20 (m, 2H), 6.75 (d,  $J$  = 15.8 Hz, 1H), 6.20 (dt,  $J$  = 15.8, 6.2 Hz, 1H), 4.77 (dd,  $J$  = 6.1, 1.4 Hz, 2H), 3.77 (s, 3H).

$^{13}C$  NMR (101 MHz,  $CDCl_3$ )  $\delta$  = 165.4, 155.5, 135.8, 134.0, 132.2, 129.0, 128.9, 128.5, 128.4, 127.7, 127.7, 127.2, 126.3, 125.5, 122.4, 67.9, 54.9.

HRMS (ESI+,  $m/z$ ) calculated for  $C_{18}H_{17}BrNO_4$   $[M + H]^+$  390.0335; found 390.0340.

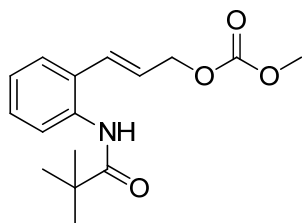

**1n**

**(*E*)-Methyl (3-(2-pivalamidophenyl)allyl) carbonate (1n)**

$^1H$  NMR (400 MHz,  $CDCl_3$ )  $\delta$  = 7.83 (d,  $J$  = 8.1 Hz, 1H), 7.40 – 7.32 (m, 2H), 7.34 – 7.23 (m, 1H), 7.12 (d,  $J$  = 15.1 Hz, 1H), 6.72 (d,  $J$  = 15.7, 1H), 6.17 (dt,  $J$  = 15.8, 6.2 Hz, 1H), 4.78 (dd,  $J$  = 6.2, 1.4 Hz, 2H), 3.79 (s, 2H), 3.44 (s, 3H), 1.32 (s, 9H).

$^{13}\text{C}$  NMR (101 MHz,  $\text{CDCl}_3$ )  $\delta$  = 176.6, 155.5, 134.8, 129.7, 129.0, 128.8, 127.1, 126.6, 125.1, 123.7, 68.0, 54.8, 39.6, 27.6.

HRMS (ESI $^{+}$ ,  $m/z$ ) calculated for  $\text{C}_{16}\text{H}_{22}\text{NO}_4$   $[\text{M} + \text{H}]^{+}$  292.1543; found 292.1553.

General procedure for the synthesis of allylic carbonate **1o** and **1p**.

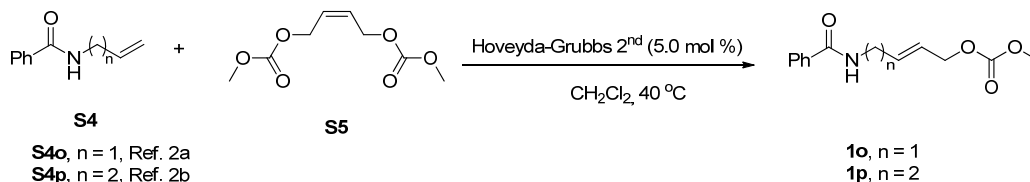

To a solution of **S4** (15.0 mmol)<sup>3</sup> and **S5** (*Z*)-but-2-ene-1,4-diyl dimethyl dicarbonate (30.0 mmol) in dry dichloromethane (50 mL), HG-II catalyst (5 mol%) was added and the mixture was heated at reflux for 2-3 h. After cooling down to room temperature, the solvent was removed under reduced pressure to yield the crude product which was purified by silica gel chromatography (EtOAc/Pentane 1:2) affording the pure compounds (**1o**, 76% yield; **1p**, 81% yield).

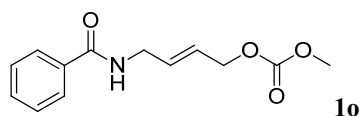

**(*E*)-4-benzamidobut-2-en-1-yl methyl carbonate (1o)**

$^1\text{H}$  NMR (400 MHz,  $\text{CDCl}_3$ )  $\delta$  = 7.77 (d,  $J$  = 7.4 Hz, 2H), 7.51 (t,  $J$  = 7.3 Hz, 1H), 7.43 (t,  $J$  = 7.5 Hz, 2H), 6.21 (brs, 1H), 5.93 (dt,  $J$  = 15.4, 5.5 Hz, 1H), 5.81 (dt,  $J$  = 11.4, 6.0 Hz, 1H), 4.63 (d,  $J$  = 5.8 Hz, 2H), 4.18 – 4.06 (m, 2H), 3.79 (s, 3H).

$^{13}\text{C}$  NMR (101 MHz,  $\text{CDCl}_3$ )  $\delta$  = 167.3, 155.4, 134.1, 131.5, 131.4, 128.4, 127.1, 126.9, 125.4, 67.4, 54.7, 41.0.

HRMS (ESI $^{+}$ ,  $m/z$ ) calculated for  $\text{C}_{13}\text{H}_{15}\text{NO}_4\text{Na}$   $[\text{M} + \text{Na}]^{+}$  272.0893; found 272.0896.

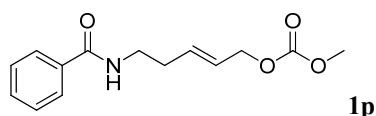

**(*E*)-5-benzamidopent-2-en-1-yl methyl carbonate (1p)**

$^1\text{H}$  NMR (400 MHz,  $\text{CDCl}_3$ )  $\delta$  = 7.73 (d,  $J$  = 7.2 Hz, 2H), 7.48 (t,  $J$  = 7.3 Hz, 1H), 7.40 (t,  $J$  = 7.4 Hz, 2H), 6.31 (brs, 1H), 5.82 (dt,  $J$  = 15.5, 7.3 Hz, 1H), 5.69 (dt,  $J$  = 15.5, 6.1 Hz, 1H), 4.58 (d,  $J$  = 5.9 Hz, 2H), 3.75 (s, 3H), 3.52 (q,  $J$  = 6.5 Hz, 2H), 2.38 (q,  $J$  = 6.6 Hz, 2H).

$^{13}\text{C}$  NMR (101 MHz,  $\text{CDCl}_3$ )  $\delta$  = 170.0, 158.1, 137.2, 135.7, 133.9, 131.1, 129.4, 128.8, 70.6, 57.3, 41.4, 34.9.

HRMS (ESI $^{+}$ ,  $m/z$ ) calculated for  $\text{C}_{14}\text{H}_{17}\text{NO}_4\text{Na}$   $[\text{M} + \text{Na}]^{+}$  286.1050; found 286.1053.

[3] **S4** were prepared according to literature procedures: a) X. Zhang, B. Cao, S. Yu, X. Zhang, *Angew. Chem. Int. Ed.* **2010**, 49, 4047; b) S. Mizuta, S. Verhoog, K. M. Engle, T. Khotavivattana, M. O'Duill, K. Wheelhouse, G. Rassias, M. Médebielle, V. Gouverneur, *J. Am. Chem. Soc.* **2013**, 135, 2505.

**General Procedure for the Iridium-catalyzed asymmetric allylic cyclization of 1a to 1n:**

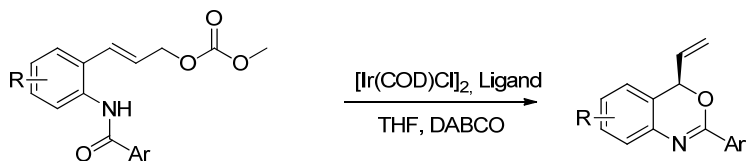

To a suspension of  $[\text{Ir}(\text{COD})\text{Cl}]_2$  (3.3 mg, 2.5 mol%) and **L7** (4.47 mg, 5.0 mol%) in 2 mL dry THF was added 3.0 eq. DABCO (72.6 mg, 0.6 mmol) under a  $\text{N}_2$  atmosphere. Then the reaction mixture was heated at 50 °C for 30 min to generate the catalyst. The corresponding allylic carbonate (2 mmol) was added and the reaction mixture was stirred until TLC showed full conversion. All volatiles were removed under reduced pressure and the residue was purified by silica gel column chromatography (Pentane/EtOAc = 10:1) to yield the desired product.

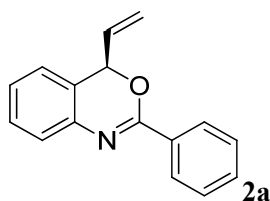

**(R)-2-Phenyl-4-vinyl-4H-benzo[d][1,3]oxazine (2a)**

Synthesized according to general procedure; 81% yield; yellow oil; enantiomeric excess was determined by HPLC (Chiracel OD-H), *n*-heptane/*i*-propanol = 90:10, 40 °C, 254 nm, 0.5 mL/min, retention times:  $t_R$  (major) 8.64 min,  $t_R$  (minor) 9.32 min, ee = 97%;  $[\alpha]_D^{20} = -8.2$  (c 1.0,  $\text{CHCl}_3$ ).

$^1\text{H}$  NMR (400 MHz,  $\text{CDCl}_3$ )  $\delta$  = 8.22 – 8.13 (m, 2H), 7.55 – 7.40 (m, 3H), 7.38 – 7.31 (m, 2H), 7.24 – 7.18 (m, 1H), 7.04 (d,  $J$  = 6.5 Hz, 1H), 6.11 (ddd,  $J$  = 17.4, 10.1, 6.4 Hz, 1H), 5.88 (d,  $J$  = 1.3 Hz, 1H), 5.35 (d,  $J$  = 6.2 Hz, 1H), 5.31 (d,  $J$  = 1.2 Hz, 1H).

$^{13}\text{C}$  NMR (101 MHz,  $\text{CDCl}_3$ )  $\delta$  = 156.6, 139.1, 135.5, 132.5, 131.4, 129.1, 128.2, 128.0, 126.5, 125.0, 124.5, 124.1, 118.4, 77.2.

HRMS (ESI<sup>+</sup>,  $m/z$ ) calculated for  $\text{C}_{16}\text{H}_{14}\text{NO}$   $[\text{M} + \text{H}]^+$  236.1070; found 236.1069.

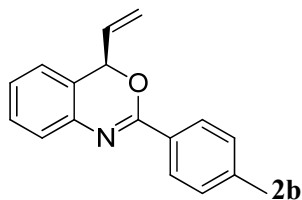

**(R)-2-(*p*-Tolyl)-4-vinyl-4H-benzo[d][1,3]oxazine (2b)**

Synthesized according to general procedure; 93% yield; yellow oil; enantiomeric excess was determined by HPLC (Chiralpak OB-H), *n*-heptane/*i*-propanol = 90:10, 40 °C, 254 nm, 0.5 mL/min, retention times:  $t_R$  (minor) 12.42 min,  $t_R$  (major) 36.83 min, ee = 94%;  $[\alpha]_D^{20} = -18.8$  (c 1.0,  $\text{CHCl}_3$ ).

$^1\text{H}$  NMR (400 MHz,  $\text{CDCl}_3$ )  $\delta$  = 8.07 (d,  $J$  = 8.2 Hz, 2H), 7.39 – 7.28 (m, 2H), 7.29 – 7.23 (m, 2H), 7.19 (ddd,  $J$  = 7.5, 5.9, 2.8 Hz, 1H), 7.04 (d,  $J$  = 7.1 Hz, 3H), 6.10 (ddd,  $J$  = 16.8, 10.3, 6.3 Hz, 1H), 5.86 (d,  $J$  = 1.3 Hz, 1H), 5.34 (d,  $J$  = 7.7 Hz, 1H), 5.31 (d,  $J$  = 1.2 Hz, 1H), 2.42 (s, 3H).

$^{13}\text{C}$  NMR (101 MHz,  $\text{CDCl}_3$ )  $\delta$  = 156.7, 141.8, 139.2, 135.5, 129.7, 129.0, 129.0, 128.0, 126.2, 124.8, 124.4, 124.1, 118.2, 77.3, 77.1, 77.0, 76.7, 21.6.

HRMS (ESI+,  $m/z$ ) calculated for  $\text{C}_{17}\text{H}_{16}\text{NO}$   $[\text{M} + \text{H}]^+$  250.1226; found 250.1231.

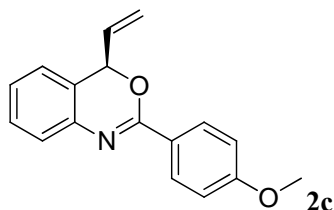

**(*R*)-2-(4-Methoxyphenyl)-4-vinyl-4H-benzo[d][1,3]oxazine (2c)**

Synthesized according to general procedure; 92% yield; yellow oil; enantiomeric excess was determined by HPLC (Chiralpak AS-H), *n*-heptane/*i*-propanol = 95:5, 40 °C, 254 nm, 0.5 mL/min, retention times:  $t_R$  (major) 9.43 min,  $t_R$  (minor) 12.34 min, ee = 95%;  $[\alpha]_D^{20}$  = -30.8 (c 1.0,  $\text{CHCl}_3$ ).

$^1\text{H}$  NMR (400 MHz,  $\text{CDCl}_3$ )  $\delta$  = 8.12 (d,  $J$  = 8.9 Hz, 2H), 7.37 – 7.27 (m, 2H), 7.22 – 7.14 (m, 1H), 7.03 (d,  $J$  = 7.4 Hz, 1H), 6.95 (d,  $J$  = 8.9 Hz, 2H), 6.16 – 5.98 (m, 1H), 5.84 (d,  $J$  = 1.3 Hz, 1H), 5.34 (d,  $J$  = 6.8 Hz, 1H), 5.30 (d,  $J$  = 1.1 Hz, 1H), 3.86 (s, 3H).

$^{13}\text{C}$  NMR (101 MHz,  $\text{CDCl}_3$ )  $\delta$  = 162.3, 156.5, 139.4, 135.5, 129.8, 129.0, 126.0, 124.9, 124.6, 124.4, 124.1, 118.2, 113.6, 77.1, 55.4.

HRMS (ESI+,  $m/z$ ) calculated for  $\text{C}_{17}\text{H}_{16}\text{NO}_2$   $[\text{M} + \text{H}]^+$  266.1176; found 266.1182.

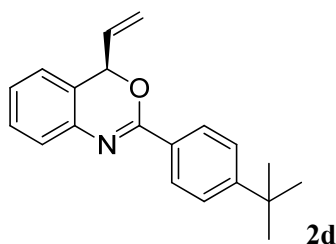

**(*R*)-2-(4-(*tert*-Butyl)phenyl)-4-vinyl-4H-benzo[d][1,3]oxazine (2d)**

Synthesized according to general procedure; 81% yield; yellow oil; enantiomeric excess was determined by HPLC (Chiralpak OJ-H), *n*-heptane/*i*-propanol = 95:5, 40 °C, 254 nm, 0.5 mL/min, retention times:  $t_R$  (major) 11.68 min,  $t_R$  (minor) 15.36 min, ee = 96%;  $[\alpha]_D^{20}$  = -20.0 (c 1.0,  $\text{CHCl}_3$ ).

$^1\text{H}$  NMR (400 MHz,  $\text{CDCl}_3$ )  $\delta$  = 8.10 (d,  $J$  = 8.5 Hz, 2H), 7.47 (d,  $J$  = 8.5 Hz, 2H), 7.37 – 7.29 (m, 2H), 7.19 (ddd,  $J$  = 7.6, 5.2, 3.4 Hz, 1H), 7.04 (d,  $J$  = 7.9 Hz, 1H), 6.10 (ddd,  $J$  = 16.8, 10.3, 6.3 Hz, 1H), 5.85 (d,  $J$  = 6.2 Hz, 1H), 5.34 (d,  $J$  = 9.7 Hz, 1H), 5.32 – 5.28 (m, 1H), 1.36 (s, 9H).

$^{13}\text{C}$  NMR (101 MHz,  $\text{CDCl}_3$ )  $\delta$  = 31.2, 34.9, 77.1, 118.2, 124.2, 124.4, 124.9, 125.2, 126.2, 127.8, 129.0, 129.7, 135.5, 139.3, 154.9, 156.7.

HRMS (ESI+,  $m/z$ ) calculated for  $\text{C}_{20}\text{H}_{22}\text{NO}$   $[\text{M} + \text{H}]^+$  292.1696; found 292.1703.

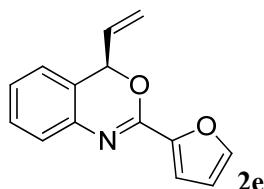

**(R)-2-(Furan-2-yl)-4-vinyl-4H-benzo[d][1,3]oxazine (2e)**

Synthesized according to general procedure; 87% yield; yellow oil; enantiomeric excess was determined by HPLC (Chiralpak OB-H), *n*-heptane/*i*-propanol = 90:10, 40 °C, 254 nm, 0.5 mL/min, retention times:  $t_R$  (minor) 17.31 min,  $t_R$  (major) 26.39 min, ee = 97%;  $[\alpha]_D^{20}$  = -3.8 (c 1.0,  $\text{CHCl}_3$ ).

$^1\text{H}$  NMR (400 MHz,  $\text{CDCl}_3$ )  $\delta$  = 7.59 (s, 1H), 7.39 – 7.26 (m, 2H), 7.18 (td,  $J$  = 7.3, 1.5 Hz, 1H), 7.09 (d,  $J$  = 3.4 Hz, 1H), 7.00 (d,  $J$  = 7.7 Hz, 1H), 6.51 (dd,  $J$  = 3.5, 1.7 Hz, 1H), 6.06 (ddd,  $J$  = 16.3, 10.8, 6.3 Hz, 1H), 5.80 (d,  $J$  = 6.4 Hz, 1H), 5.34 (d,  $J$  = 1.1 Hz, 1H), 5.31 (d,  $J$  = 7.0 Hz, 1H).

$^{13}\text{C}$  NMR (101 MHz,  $\text{CDCl}_3$ )  $\delta$  = 149.5, 146.5, 145.6, 138.4, 135.0, 129.2, 126.5, 125.0, 124.5, 124.0, 118.7, 114.8, 111.8, 77.2.

HRMS (ESI+,  $m/z$ ) calculated for  $\text{C}_{14}\text{H}_{12}\text{NO}_2$   $[\text{M} + \text{H}]^+$  226.0863; found 226.0869.

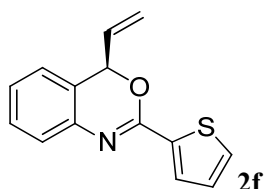

**(R)-2-(Thiophen-2-yl)-4-vinyl-4H-benzo[d][1,3]oxazine (2f)**

Synthesized according to general procedure; 83% yield; yellow oil; enantiomeric excess was determined by HPLC (Chiracel OD-H), *n*-heptane/*i*-propanol = 95:5, 40 °C, 254 nm, 0.5 mL/min, retention times:  $t_R$  (major) 10.37 min,  $t_R$  (minor) 14.00 min, ee = 95%;  $[\alpha]_D^{20}$  = -21.6 (c 1.01,  $\text{CHCl}_3$ ).

$^1\text{H}$  NMR (400 MHz,  $\text{CDCl}_3$ )  $\delta$  = 7.79 – 7.73 (m, 1H), 7.49 (dd,  $J$  = 5.1, 1.2 Hz, 1H), 7.37 – 7.26 (m, 2H), 7.18 (td,  $J$  = 7.2, 1.8 Hz, 1H), 7.10 (dd,  $J$  = 5.0, 3.7 Hz, 1H), 7.02 (d,  $J$  = 7.8 Hz, 1H), 6.08 (ddd,  $J$  = 16.8, 10.1, 6.2 Hz, 1H), 5.83 (d,  $J$  = 6.2 Hz, 1H), 5.35 (d,  $J$  = 3.8 Hz, 1H), 5.32 (d,  $J$  = 3.5 Hz, 1H).

$^{13}\text{C}$  NMR (101 MHz,  $\text{CDCl}_3$ )  $\delta$  = 155.3, 138.7, 135.2, 134.4, 134.3, 131.3, 129.5, 129.2, 128.0, 126.8, 126.0, 125.1, 124.5, 124.0, 118.7, 77.4.

HRMS (ESI+,  $m/z$ ) calculated for  $\text{C}_{14}\text{H}_{12}\text{NOS}$   $[\text{M} + \text{H}]^+$  242.0634; found 242.0640.

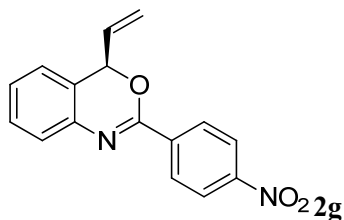

**(R)-2-(4-Nitrophenyl)-4-vinyl-4H-benzo[d][1,3]oxazine (2g)**

Synthesized according to general procedure; 93% yield; yellow solid, m.p. = 147-149 °C; enantiomeric excess was determined by HPLC (Chiralpak AS-H), *n*-heptane/*i*-propanol = 95:5, 40 °C, 254 nm, 0.5 mL/min, retention times:  $t_R$  (major) 14.73 min,  $t_R$  (minor) 17.73 min, ee = 92%;  $[\alpha]_D^{20}$  = -18.6 (c 1.0, CHCl<sub>3</sub>).

<sup>1</sup>H NMR (400 MHz, CDCl<sub>3</sub>)  $\delta$  = 8.32 (d,  $J$  = 8.9 Hz, 2H), 8.26 (d,  $J$  = 8.8 Hz, 2H), 7.41 – 7.30 (m, 2H), 7.25 (td,  $J$  = 6.9, 1.8 Hz, 1H), 7.05 (d,  $J$  = 7.4 Hz, 1H), 6.09 (ddd,  $J$  = 16.9, 10.3, 6.5 Hz, 1H), 5.91 (d,  $J$  = 6.5 Hz, 1H), 5.40 – 5.29 (m, 2H).

<sup>13</sup>C NMR (101 MHz, CDCl<sub>3</sub>)  $\delta$  = 154.3, 149.4, 138.4, 138.3, 135.1, 129.3, 128.7, 127.5, 125.4, 124.6, 123.8, 123.4, 119.0, 77.6.

HRMS (ESI<sup>+</sup>,  $m/z$ ) calculated for C<sub>16</sub>H<sub>13</sub>N<sub>2</sub>O<sub>3</sub> [M + H]<sup>+</sup> 281.0921; found 281.0928.

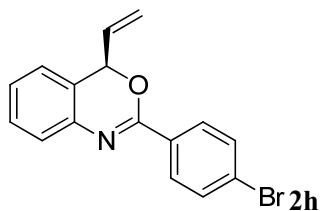

**(R)-2-(4-Bromophenyl)-4-vinyl-4H-benzo[d][1,3]oxazine (2h)**

Synthesized according to general procedure; 90% yield; yellow oil; enantiomeric excess was determined by HPLC (Chiralpak OJ-H), *n*-heptane/*i*-propanol = 90:10, 40 °C, 254 nm, 0.5 mL/min, retention times:  $t_R$  (major) 14.67 min,  $t_R$  (minor) 17.55 min, ee = 97%;  $[\alpha]_D^{20}$  = -18.4 (c 1.0, CHCl<sub>3</sub>).

<sup>1</sup>H NMR (400 MHz, CDCl<sub>3</sub>)  $\delta$  = 8.03 (d,  $J$  = 8.6 Hz, 2H), 7.57 (d,  $J$  = 8.6 Hz, 2H), 7.38 – 7.28 (m, 2H), 7.21 (td,  $J$  = 7.1, 1.9 Hz, 1H), 7.04 (d,  $J$  = 7.5 Hz, 1H), 6.08 (ddd,  $J$  = 16.9, 10.4, 6.4 Hz, 1H), 5.86 (d,  $J$  = 6.4 Hz, 1H), 5.34 (d,  $J$  = 3.6 Hz, 1H), 5.31 (d,  $J$  = 10.3 Hz, 1H).

<sup>13</sup>C NMR (101 MHz, CDCl<sub>3</sub>)  $\delta$  = 155.7, 138.8, 135.3, 131.5, 129.5, 129.2, 126.7, 126.2, 125.0, 124.5, 124.0, 118.6, 77.3. (One resonance is missing due to coincidental overlap)

HRMS (ESI<sup>+</sup>,  $m/z$ ) calculated for C<sub>16</sub>H<sub>13</sub>BrNO [M + H]<sup>+</sup> 314.0175; found 314.0187.

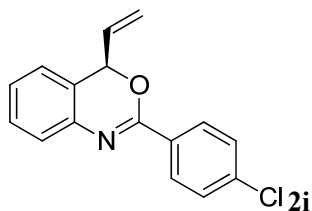

**(R)-2-(4-Chlorophenyl)-4-vinyl-4H-benzo[d][1,3]oxazine (2i)**

Synthesized according to general procedure; 90% yield; yellow oil; enantiomeric excess was determined by HPLC (Chiralpak OJ-H), *n*-heptane/*i*-propanol = 90:10, 40 °C, 254 nm, 0.5 mL/min, retention times:  $t_R$  (major) 15.29 min,  $t_R$  (minor) 19.18 min, ee = 95%;  $[\alpha]_D^{20} = -3.8$  (c 1.0, CHCl<sub>3</sub>).

<sup>1</sup>H NMR (400 MHz, CDCl<sub>3</sub>)  $\delta$  = 8.11 (d,  $J$  = 8.6 Hz, 2H), 7.41 (d,  $J$  = 8.6 Hz, 2H), 7.37 – 7.28 (m, 2H), 7.21 (td,  $J$  = 7.2, 1.9 Hz, 1H), 7.04 (d,  $J$  = 7.9 Hz, 1H), 6.09 (ddd,  $J$  = 16.9, 10.4, 6.4 Hz, 1H), 5.85 (d,  $J$  = 6.4 Hz, 1H), 5.34 (dd,  $J$  = 2.0, 1.2 Hz, 1H), 5.31 (d,  $J$  = 9.6 Hz, 1H).

<sup>13</sup>C NMR (101 MHz, CDCl<sub>3</sub>)  $\delta$  = 155.6, 138.8, 137.6, 135.3, 134.7, 131.0, 129.3, 129.2, 128.5, 126.7, 125.0, 124.5, 124.0, 118.5, 77.3.

HRMS (ESI+,  $m/z$ ) calculated for C<sub>16</sub>H<sub>13</sub>ClNO  $[M + H]^+$  270.0680; found 270.0688.

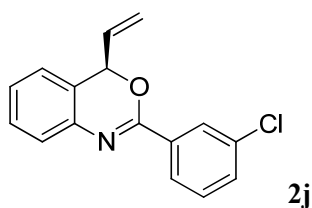

**(R)-2-(3-Chlorophenyl)-4-vinyl-4H-benzo[d][1,3]oxazine (2j)**

Synthesized according to general procedure; 67% yield; yellow oil; enantiomeric excess was determined by HPLC (Chiralpak OJ-H), *n*-heptane/*i*-propanol = 95:5, 40 °C, 254 nm, 0.5 mL/min, retention times:  $t_R$  (major) 12.85 min,  $t_R$  (minor) 17.61 min, ee = 83%;  $[\alpha]_D^{20} = -2.0$  (c 1.0, CHCl<sub>3</sub>).

<sup>1</sup>H NMR (400 MHz, CDCl<sub>3</sub>)  $\delta$  = 8.15 (s, 1H), 8.05 (d,  $J$  = 7.8 Hz, 1H), 7.46 (ddd,  $J$  = 8.0, 2.1, 1.1 Hz, 1H), 7.41 – 7.29 (m, 3H), 7.22 (ddd,  $J$  = 7.5, 6.4, 2.2 Hz, 1H), 7.04 (d,  $J$  = 7.3 Hz, 1H), 6.09 (ddd,  $J$  = 16.9, 10.4, 6.4 Hz, 1H), 5.87 (d,  $J$  = 6.2 Hz, 1H), 5.35 (d,  $J$  = 5.1 Hz, 1H), 5.32 (d,  $J$  = 11.8 Hz, 1H).

<sup>13</sup>C NMR (101 MHz, CDCl<sub>3</sub>)  $\delta$  = 155.3, 138.7, 135.2, 134.4, 134.3, 131.3, 129.5, 129.2, 128.0, 126.8, 126.0, 125.1, 124.5, 124.0, 118.7, 77.4.

HRMS (ESI+,  $m/z$ ) calculated for C<sub>16</sub>H<sub>13</sub>ClNO  $[M + H]^+$  270.0680; found 270.0689.

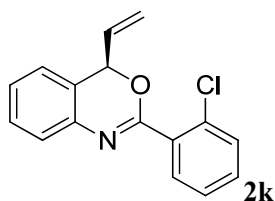

**(R)-2-(2-Chlorophenyl)-4-vinyl-4H-benzo[d][1,3]oxazine (2k)**

Synthesized according to general procedure; 67% yield; yellow oil; enantiomeric excess was determined by HPLC (Chiracel OD-H), *n*-heptane/*i*-propanol = 95:5, 40 °C, 254 nm, 0.5 mL/min, retention times: *t*<sub>R</sub> (major) 10.54 min, *t*<sub>R</sub> (minor) 15.32 min, ee = 97%; [ $\alpha$ ]<sub>D</sub><sup>20</sup> = +6.0 (c 1.0, CHCl<sub>3</sub>).

<sup>1</sup>H NMR (400 MHz, CDCl<sub>3</sub>)  $\delta$  = 7.74 (dd, *J* = 7.5, 1.9 Hz, 1H), 7.44 (dd, *J* = 7.9, 1.4 Hz, 1H), 7.41 – 7.29 (m, 4H), 7.28 – 7.21 (m, 1H), 7.04 (d, *J* = 7.4 Hz, 1H), 6.21 (ddd, *J* = 17.2, 10.3, 7.1 Hz, 1H), 5.92 (d, *J* = 7.2 Hz, 1H), 5.41 (d, *J* = 4.5 Hz, 1H), 5.38 (d, *J* = 11.3 Hz, 1H).

<sup>13</sup>C NMR (101 MHz, CDCl<sub>3</sub>)  $\delta$  = 157.2, 138.7, 135.0, 133.3, 132.7, 131.3, 131.1, 130.5, 129.2, 127.1, 126.7, 125.0, 124.5, 123.8, 119.6, 78.1.

HRMS (ESI<sup>+</sup>, *m/z*) calculated for C<sub>16</sub>H<sub>13</sub>ClNO [M + H]<sup>+</sup> 270.0680; found 270.0689.

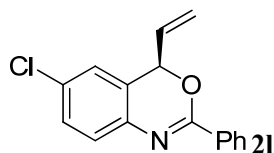

**(R)-6-Chloro-2-phenyl-4-vinyl-4H-benzo[d][1,3]oxazine (2l)**

Synthesized according to general procedure; 89% yield; yellow oil; enantiomeric excess was determined by HPLC (Chiralpak OB-H), *n*-heptane/*i*-propanol = 98:2, 40 °C, 254 nm, 0.5 mL/min, retention times: *t*<sub>R</sub> (minor) 18.33 min, *t*<sub>R</sub> (major) 21.89, ee = 90%; [ $\alpha$ ]<sub>D</sub><sup>20</sup> = -4.4 (c 1.0, CHCl<sub>3</sub>).

<sup>1</sup>H NMR (400 MHz, CDCl<sub>3</sub>)  $\delta$  = 8.15 (d, *J* = 7.0 Hz, 2H), 7.51 (t, *J* = 7.2 Hz, 1H), 7.44 (t, *J* = 7.3 Hz, 2H), 7.34 – 7.21 (m, 2H), 7.03 (d, *J* = 2.2 Hz, 1H), 6.07 (ddd, *J* = 16.9, 10.6, 6.5 Hz, 1H), 5.81 (d, *J* = 6.5 Hz, 1H), 5.39 (s, 1H), 5.35 (d, *J* = 7.6 Hz, 1H).

<sup>13</sup>C NMR (101 MHz, CDCl<sub>3</sub>)  $\delta$  = 156.8, 137.8, 134.7, 132.1, 131.6, 131.4, 129.1, 128.3, 128.0, 126.2, 125.6, 124.6, 119.1, 77.3, 77.0, 76.8, 76.7.

HRMS (ESI<sup>+</sup>, *m/z*) calculated for C<sub>16</sub>H<sub>13</sub>ClNO [M + H]<sup>+</sup> 270.0680; found 270.0688.

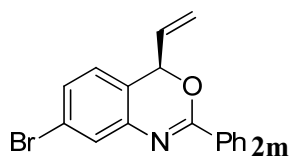

**(R)-7-Bromo-2-phenyl-4-vinyl-4H-benzo[d][1,3]oxazine (2m)**

Synthesized according to general procedure; 81% yield; colorless solid, m.p. = 74-76 °C; enantiomeric excess was determined by HPLC (Chiralpak OJ-H), *n*-heptane/*i*-propanol = 95:5, 40 °C, 254 nm, 0.5 mL/min, retention times: *t*<sub>R</sub> (major) 18.40 min, *t*<sub>R</sub> (minor) 23.22 min, ee = 93%; [ $\alpha$ ]<sub>D</sub><sup>20</sup> = -11.4 (c 1.0, CHCl<sub>3</sub>). The absolute configuration of **2m** was determined as *R* by X-ray crystallographic analysis.<sup>[4]</sup>

[4] CCDC 957091 contains the supplementary crystallographic data for **2m**.

$^1\text{H}$  NMR (400 MHz,  $\text{CDCl}_3$ )  $\delta$  = 8.15 (d,  $J$  = 7.0 Hz, 2H), 7.57 – 7.40 (m, 4H), 7.32 (dd,  $J$  = 8.0, 2.0 Hz, 1H), 6.90 (d,  $J$  = 8.0 Hz, 1H), 6.06 (ddd,  $J$  = 16.9, 10.4, 6.4 Hz, 1H), 5.82 (d,  $J$  = 6.4 Hz, 1H), 5.39 – 5.35 (m, 1H), 5.32 (d,  $J$  = 9.8 Hz, 1H).

$^{13}\text{C}$  NMR (101 MHz,  $\text{CDCl}_3$ )  $\delta$  = 157.5, 140.7, 134.9, 132.1, 131.8, 129.2, 128.3, 128.3, 128.1, 127.9, 125.9, 123.0, 122.4, 118.9, 77.0.

HRMS (ESI+,  $m/z$ ) calculated for  $\text{C}_{16}\text{H}_{13}\text{BrNO}$   $[\text{M} + \text{H}]^+$  314.0175; found 314.0186.

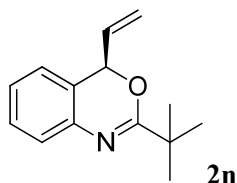

**(R)-2-(tert-Butyl)-4-vinyl-4H-benzo[d][1,3]oxazine (2n)**

Synthesized according to general procedure; 63% yield; yellow oil; enantiomeric excess was determined by Chiralsil Dex CB (25 m x 0.25 mm x 0.25  $\mu\text{m}$ ), (initial temp. 40  $^\circ\text{C}$ , gradient 10  $^\circ\text{C}/\text{min}$  to 120  $^\circ\text{C}$ ), retention time:  $t_R$  (minor) 35.48 min,  $t_R$  (major) 35.93 min, ee = 86%;  $[\alpha]_D^{20}$  = +41.8 (c 1.0,  $\text{CHCl}_3$ ).

$^1\text{H}$  NMR (400 MHz,  $\text{CDCl}_3$ )  $\delta$  = 7.31 – 7.23 (m, 1H), 7.19 (d,  $J$  = 7.7 Hz, 1H), 7.14 (td,  $J$  = 7.4, 1.3 Hz, 1H), 6.95 (d,  $J$  = 7.5 Hz, 1H), 6.03 (ddd,  $J$  = 17.0, 10.3, 6.7 Hz, 1H), 5.63 (d,  $J$  = 6.7 Hz, 1H), 5.28 (d,  $J$  = 10.2 Hz, 1H), 5.22 (d,  $J$  = 17.1 Hz, 1H), 1.26 (s, 9H).

$^{13}\text{C}$  NMR (101 MHz,  $\text{CDCl}_3$ )  $\delta$  = 167.9, 138.9, 135.6, 128.9, 126.0, 124.6, 124.5, 123.7, 118.4, 76.7, 37.3, 27.6.

HRMS (ESI+,  $m/z$ ) calculated for  $\text{C}_{14}\text{H}_{18}\text{NO}$   $[\text{M} + \text{H}]^+$  216.1383; found 216.1388.

**General Procedure for the Iridium-catalyzed asymmetric allylic cyclization of 1o and 1p:**

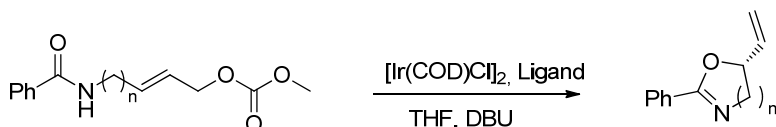

To a suspension of  $[\text{Ir}(\text{COD})\text{Cl}]_2$  (3.3 mg, 2.5 mol%) and **L7** (4.47 mg, 5.0 mol%) in 2.0 mL dry THF was added 0.5 eq. DBU (8  $\mu\text{L}$ , 0.1 mmol) under a  $\text{N}_2$  atmosphere. Then the reaction mixture was heated at 50  $^\circ\text{C}$  for 30 min to generate the catalyst. After cooling down to room temperature, the corresponding allylic carbonate (0.2 mmol) was added and the reaction mixture was stirred at rt for 24 h until TLC showed full conversion. The reaction was quenched by  $\text{H}_2\text{O}$  and extracted with ether. The combined organic layer was dried over  $\text{Na}_2\text{SO}_4$  and concentrated under vacuum. The residue was purified by silica gel column chromatography (Pentane/EtOAc = 10:1 to 4:1) to yield the desired product.

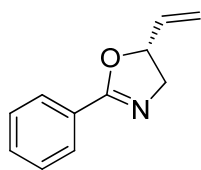

**2o**

**(R)-2-phenyl-5-vinyl-4,5-dihydrooxazole**

Synthesized according to general procedure; 60% yield; pale yellow oil; enantiomeric excess was determined by HPLC (Chiracel OD-H), *n*-heptane/*i*-propanol = 90:10, 40 °C, 254 nm, 0.5 mL/min, retention times: *t<sub>R</sub>* (minor) 9.9 min, *t<sub>R</sub>* (major) 18.5 min, ee = 95%;  $[\alpha]_D^{20} = -56.0$  (c 1.0, CHCl<sub>3</sub>).

<sup>1</sup>H NMR (400 MHz, CDCl<sub>3</sub>) δ 7.96 (d, *J* = 7.3 Hz, 2H), 7.47 (t, *J* = 7.3 Hz, 1H), 7.41 (t, *J* = 7.4 Hz, 2H), 5.96 (ddd, *J* = 17.2, 10.3, 6.9 Hz, 1H), 5.38 (d, *J* = 17.1 Hz, 1H), 5.25 (d, *J* = 10.4 Hz, 1H), 5.18 – 5.02 (m, 1H), 4.21 (dd, *J* = 14.6, 9.9 Hz, 1H), 3.78 (dd, *J* = 14.6, 7.9 Hz, 1H).

<sup>13</sup>C NMR (101 MHz, CDCl<sub>3</sub>) δ 163.9, 136.3, 131.3, 128.3, 128.2, 127.6, 117.3, 80.5, 60.4.

HRMS (ESI+, *m/z*) calculated for C<sub>11</sub>H<sub>12</sub>NO [M + H]<sup>+</sup> 174.09134; found 174.09135.

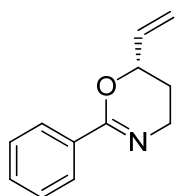

**2p**

**(S)-2-phenyl-6-vinyl-5,6-dihydro-4H-1,3-oxazine**

Synthesized according to general procedure; 67% yield; pale yellow oil; enantiomeric excess was determined by HPLC (Chiracel OD-H), *n*-heptane/*i*-propanol = 90:10, 40 °C, 254 nm, 1.0 mL/min, retention times: *t<sub>R</sub>* (minor) 4.6 min, *t<sub>R</sub>* (major) 6.3 min, ee = 92%;  $[\alpha]_D^{20} = +25.1$  (c 2.0, CHCl<sub>3</sub>).

<sup>1</sup>H NMR (400 MHz, CDCl<sub>3</sub>) δ 7.88 (d, *J* = 6.8 Hz, 2H), 7.42 – 7.23 (m, 3H), 5.89 (ddd, *J* = 17.2, 10.6, 5.3 Hz, 1H), 5.32 (dt, *J* = 17.2, 1.3 Hz, 1H), 5.21 (dt, *J* = 10.6, 1.2 Hz, 1H), 4.79 – 4.65 (m, 1H), 3.64 – 3.47 (m, 2H), 1.98 (dq, *J* = 13.3, 4.7, 1H), 1.72 (dtd, *J* = 14.1, 8.6, 5.7, 1H).

<sup>13</sup>C NMR (101 MHz, CDCl<sub>3</sub>) δ 155.4, 136.6, 133.8, 130.4, 128.0, 126.9, 116.3, 74.9, 41.9, 26.9.

HRMS (ESI+, *m/z*) calculated for C<sub>12</sub>H<sub>14</sub>NO [M + H]<sup>+</sup> 188.10699; found 188.10697.

#### Procedure for cross metathesis of **2a**.

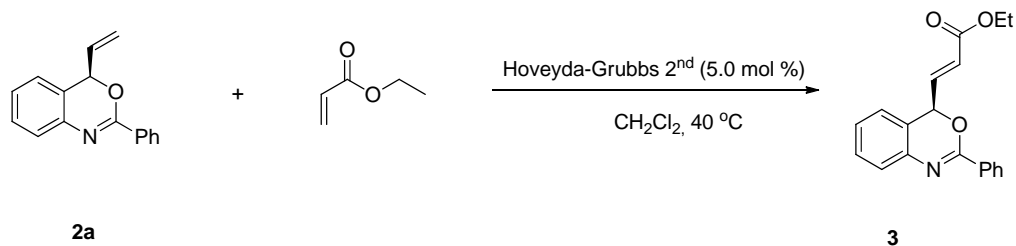

To a solution of **2a** (0.2 mmol, 47.5 mg) and ethyl acrylate (0.6 mmol, 64  $\mu$ L) in dry dichloromethane (2 mL), HG-II catalyst (6.3 mg, 0.01 mmol, 5 mol%) was added and the mixture was heated at reflux for 18 h. The mixture was cooled down to room temperature and the solvent was removed under reduced pressure to yield the crude product which was purified by silica gel chromatography (EtOAc/Pentane 1:10) affording **3** in 70 % yield as colorless oil. Enantiomeric excess was determined by HPLC (Chiralpak AD-H), *n*-heptane/*i*-propanol = 90:10, 40 °C, 254 nm, 0.5 mL/min, retention times:  $t_R$  (minor) 11.16 min,  $t_R$  (major) 12.07 min, ee = 90%;  $[\alpha]_D^{20} = -85.6$  (c 1.0, CHCl<sub>3</sub>). <sup>1</sup>H NMR (400 MHz, CDCl<sub>3</sub>)  $\delta$  = 8.18 (d,  $J$  = 8.4 Hz, 2H), 7.55 – 7.50 (m, 1H), 7.49 – 7.43 (m, 2H), 7.40 – 7.31 (m, 2H), 7.25 – 7.19 (m, 1H), 7.12 – 7.01 (m, 2H), 6.06 (d,  $J$  = 5.4 Hz, 1H), 5.99 (d,  $J$  = 15.7 Hz, 1H), 4.17 (q,  $J$  = 7.1 Hz, 2H), 1.25 (t,  $J$  = 7.1 Hz, 3H). <sup>13</sup>C NMR (101 MHz, CDCl<sub>3</sub>)  $\delta$  = 165.7, 155.8, 143.4, 138.7, 132.0, 131.7, 129.6, 128.4, 128.3, 128.0, 126.8, 125.4, 124.4, 122.7, 122.4, 74.9, 60.8, 14.1. HRMS (ESI<sup>+</sup>,  $m/z$ ) calculated for C<sub>19</sub>H<sub>18</sub>NO<sub>3</sub> [M + H]<sup>+</sup> 308.1282; found 308.1281.

#### Procedure for the addition of organolithium reagent to benzoxazine.

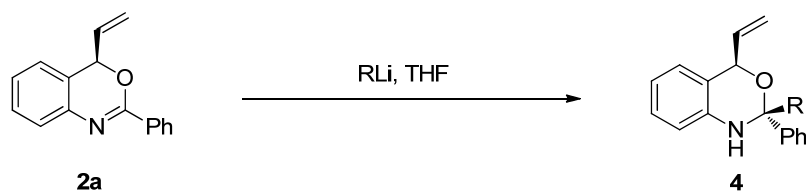

General procedure for the addition of organolithium reagents to benzoxazine: To a solution of the **2a** (40 mg, 0.17 mmol) in THF (2 mL) was added the corresponding organolithium reagent at -78 °C (-40 °C for MeLi·LiBr). The mixture was allowed to gradually warm to RT (0 °C for MeLi·LiBr). After the reaction is completed as monitored by TLC, the reaction was quenched with water (2 mL) and the mixture extracted with CH<sub>2</sub>Cl<sub>2</sub> (3 x 5 mL). The combined organic layers were dried over Na<sub>2</sub>SO<sub>4</sub> and concentrated under vacuum. The residue was purified by silica gel column chromatography (Pentane/EtOAc = 15:1) to yield the desired product.

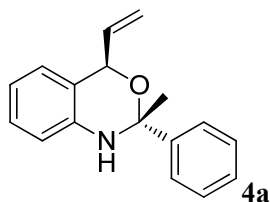

**(2R,4R)-2-Methyl-2-phenyl-4-vinyl-2,4-dihydro-1H-benzo[d][1,3]oxazine (4a)**

Synthesized according to the general procedure for the addition of organolithium reagents to benzoxazine. **2a** was treated with 1.5 eq of MeLi·LiBr and the mixture was allowed to gradually warm to 0 °C in 3 h. The product was obtained in 67% yield as white solid, m.p. = 122–124 °C. Enantiomeric excess was determined by HPLC (Chiralpak OJ-H), *n*-heptane/*i*-propanol = 90:10, 40 °C, 254 nm, 0.5 mL/min, retention times: *t<sub>R</sub>* (minor) 13.0 min, *t<sub>R</sub>* (major) 17.0 min, ee = 96%;  $[\alpha]_D^{20} = +200.0$  (c 1.04, CHCl<sub>3</sub>). The relative configuration of **4a** was determined by X-ray analysis<sup>[5]</sup> and NOESY experiment. <sup>1</sup>H NMR (500 MHz, CDCl<sub>3</sub>) δ = 7.54 (d, *J* = 7.3 Hz, 2H), 7.32 (t, *J* = 7.5 Hz, 2H), 7.26 (t, *J* = 7.3 Hz, 1H), 7.12 (t, *J* = 7.6 Hz, 1H), 6.81 (d, *J* = 8.0 Hz, 2H), 6.72 (t, *J* = 7.5 Hz, 1H), 6.03–5.83 (m, 1H), 5.39 (s, 1H), 5.36 (d, *J* = 5.9 Hz, 1H), 4.74 (d, *J* = 8.1 Hz, 1H), 4.47 (s, 1H), 1.75 (s, 3H). <sup>13</sup>C NMR (101 MHz, CDCl<sub>3</sub>) δ = 144.1, 140.2, 137.3, 128.5, 127.8, 127.6, 126.7, 125.9, 123.3, 119.4, 119.0, 116.4, 85.5, 74.0, 31.9. HRMS (ESI<sup>+</sup>, *m/z*) calculated for C<sub>17</sub>H<sub>18</sub>NO [M + H]<sup>+</sup> 252.1383; found 252.1383.

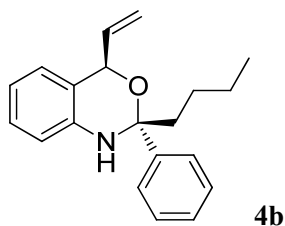

**(2R,4R)-2-Butyl-2-phenyl-4-vinyl-2,4-dihydro-1H-benzo[d][1,3]oxazine (4b)**

Synthesized according to the general procedure for the addition of organolithium reagents to benzoxazine. **2a** was treated with 1.1 eq of *n*BuLi at -78 °C and the reaction mixture was allowed to gradually warm to room temperature overnight. The product was obtained in 70% yield as a colorless oil.  $[\alpha]_D^{20} = +262.0$  (c 1.0, CHCl<sub>3</sub>). <sup>1</sup>H NMR (400 MHz, CDCl<sub>3</sub>) δ = 7.50 (d, *J* = 7.1 Hz, 2H), 7.32 (t, *J* = 7.3 Hz, 2H), 7.25 (t, *J* = 7.2 Hz, 1H), 7.10 (t, *J* = 7.6 Hz, 1H), 6.80 (d, *J* = 8.2 Hz, 2H), 6.71 (t, *J* = 7.5 Hz, 1H), 5.94 (ddd, *J* = 11.3, 9.6, 8.1 Hz, 1H), 5.39 (d, *J* = 4.5 Hz, 1H), 5.35 (s, 1H), 4.79 (d, *J* = 8.1 Hz, 1H), 4.48 (brs, 1H), 2.10–1.99 (m, 1H), 1.99–1.88 (m, 1H), 1.56–1.38 (m, 1H), 1.38–1.23 (m, 2H), 1.22–1.09 (m, 1H), 0.87 (t, *J* = 7.3 Hz, 3H). <sup>13</sup>C NMR (101 MHz, CDCl<sub>3</sub>) δ = 143.5, 140.3, 137.4, 128.4, 127.7, 127.5, 127.2, 125.9, 123.4, 119.1, 118.8, 116.3, 87.5, 73.7, 44.0, 25.4, 22.8, 13.9. HRMS (ESI<sup>+</sup>, *m/z*) calculated for C<sub>20</sub>H<sub>24</sub>NO<sub>3</sub> [M + H]<sup>+</sup> 294.1852; found 294.1854.

[5] CCDC 957090 contains the supplementary crystallographic data for **4a**.

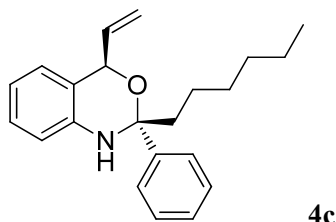

**4c**

**(2*R*,4*R*)-2-hexyl-2-phenyl-4-vinyl-2,4-dihydro-1H-benzo[d][1,3]oxazine (4c)**

Synthesized according to the general procedure for the addition of organolithium reagents to benzoxazine. **2a** was treated with 1.1 eq of *n*-hexylLi at -78 °C and the mixture was allowed to gradually warm to room temperature overnight. The product was obtained in 73% yield as a colorless oil.  $[\alpha]_D^{20} = +166.7$  (c 1.04, CHCl<sub>3</sub>). <sup>1</sup>H NMR (400 MHz, CDCl<sub>3</sub>)  $\delta$  = 7.49 (d, *J* = 7.2 Hz, 2H), 7.31 (t, *J* = 7.3 Hz, 2H), 7.25 (t, *J* = 7.2 Hz, 1H), 7.10 (t, *J* = 7.3 Hz, 1H), 6.81 (t, *J* = 8.5 Hz, 2H), 6.70 (t, *J* = 7.5 Hz, 1H), 6.01 – 5.80 (m, 1H), 5.38 (d, *J* = 4.5 Hz, 1H), 5.34 (s, 1H), 4.78 (d, *J* = 8.0 Hz, 1H), 4.47 (brs, 1H), 2.02 (ddd, *J* = 13.7, 11.8, 5.0 Hz, 1H), 1.97 – 1.87 (m, 1H), 1.53 – 1.39 (m, 1H), 1.37 – 1.02 (m, 7H), 0.85 (t, *J* = 6.8 Hz, 3H). <sup>13</sup>C NMR (101 MHz, CDCl<sub>3</sub>)  $\delta$  = 143.5, 140.3, 137.4, 128.4, 127.7, 127.5, 127.2, 125.9, 123.4, 119.0, 118.8, 116.3, 87.5, 73.7, 44.2, 31.6, 29.4, 23.2, 22.5, 14.0. HRMS (ESI+, *m/z*) calculated for C<sub>22</sub>H<sub>28</sub>NO [M + H]<sup>+</sup> 322.2165; found 322.2166.

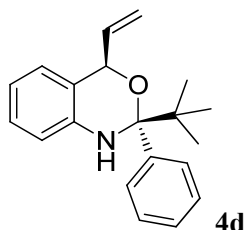

**4d**

**(2*R*,4*R*)-2-(*tert*-Butyl)-2-phenyl-4-vinyl-2,4-dihydro-1H-benzo[d][1,3]oxazine (4d)**

Synthesized according to the general procedure for the addition of organolithium reagents to benzoxazine. **2a** was treated with 1.1 eq of *t*BuLi at -78 °C and the mixture was allowed to gradually warm to room temperature overnight. The product was obtained in 42% yield as a colorless oil.  $[\alpha]_D^{20} = +89.4$  (c 1.0, CHCl<sub>3</sub>). <sup>1</sup>H NMR (400 MHz, CDCl<sub>3</sub>)  $\delta$  = 7.49 (d, *J* = 7.3 Hz, 2H), 7.30 (t, *J* = 7.3 Hz, 2H), 7.23 (t, *J* = 7.2 Hz, 1H), 7.05 (t, *J* = 7.6 Hz, 1H), 6.79 (d, *J* = 7.6 Hz, 1H), 6.73 (d, *J* = 7.9 Hz, 1H), 6.64 (t, *J* = 7.4 Hz, 1H), 5.99 (ddd, *J* = 17.5, 10.1, 7.6 Hz, 1H), 5.43 (dd, *J* = 17.1, 0.7 Hz, 1H), 5.35 (dd, *J* = 10.1, 1.5 Hz, 1H), 4.98 (d, *J* = 7.5 Hz, 1H), 4.74 (brs, 1H), 1.03 (s, 9H). <sup>13</sup>C NMR (101 MHz, CDCl<sub>3</sub>)  $\delta$  = 140.8, 140.7, 137.7, 129.5, 127.5, 127.4, 127.3, 125.5, 123.0, 118.0, 117.8, 115.6, 90.6, 73.3, 39.2, 25.1. HRMS (ESI+, *m/z*) calculated for C<sub>20</sub>H<sub>24</sub>NO<sub>3</sub> [M + H]<sup>+</sup> 294.1852; found 294.1855.

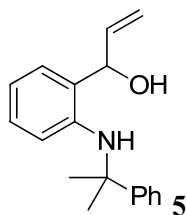

**1-(2-((2-Phenylpropan-2-yl)amino)phenyl)prop-2-en-1-ol (5)**

To a solution of the **2a** (40 mg, 0.17 mmol) in THF (2 mL) was added the MeLi·LiBr (0.51 mmol, 3.0 eq) at -40 °C. The mixture was allowed to gradually warm to RT. After stirring at RT for 3 h, the reaction was quenched with water (2 mL) and the mixture extracted with CH<sub>2</sub>Cl<sub>2</sub> (3 x 5 mL). The combined organic layers were dried over Na<sub>2</sub>SO<sub>4</sub> and concentrated under vacuum. The residue was purified by silica gel column chromatography (Pentane/EtOAc = 10:1) to yield **5** as colorless oil in 40% yield. <sup>1</sup>H NMR (400 MHz, CHCl<sub>3</sub>) δ = 7.46 (d, *J* = 7.1 Hz, 2H), 7.31 (t, *J* = 7.6 Hz, 2H), 7.21 (t, *J* = 7.3 Hz, 1H), 7.07 (dd, *J* = 7.5, 1.7 Hz, 1H), 6.86 (ddd, *J* = 8.2, 7.3, 1.7 Hz, 1H), 6.56 (td, *J* = 7.4, 1.1 Hz, 1H), 6.27 (ddd, *J* = 17.2, 10.5, 4.9 Hz, 1H), 6.09 (d, *J* = 8.3 Hz, 1H), 5.47 (d, *J* = 17.3 Hz, 1H), 5.35 (dt, *J* = 10.5, 1.6 Hz, 1H), 5.30 (d, *J* = 5.0 Hz, 1H), 1.65 (s, 3H), 1.64 (s, 3H). <sup>13</sup>C NMR (101 MHz, CHCl<sub>3</sub>) δ = 147.6, 144.6, 138.4, 128.5, 128.3, 128.2, 126.2, 125.6, 125.4, 115.9, 115.3, 115.2, 75.3, 55.6, 30.9, 30.5. HRMS (ESI<sup>+</sup>, *m/z*) calculated for C<sub>18</sub>H<sub>22</sub>NO [M + H]<sup>+</sup> 268.1689; found 268.1696.

**X-ray analysis of 2m and 4a: Determination of Relative and Absolute Configuration**

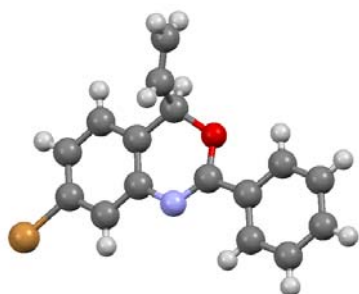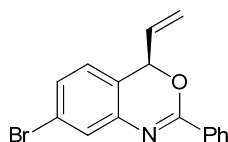

**2m**

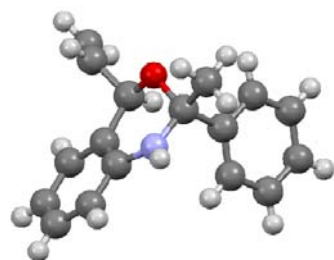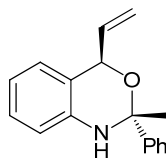

**4a**

### Crystal structure determination of 2m

Crystal data.  $C_{16}H_{12}BrNO$ , Fw = 314.18, colourless plate,  $0.21 \times 0.10 \times 0.09 \text{ mm}^3$ , triclinic,  $P_1$  (no. 1),  $a = 6.3154(5)$ ,  $b = 8.1371(7)$ ,  $c = 14.3362(12) \text{ \AA}$ ,  $\alpha = 85.222(3)$ ,  $\beta = 78.520(3)$ ,  $\gamma = 70.043^\circ$ ,  $V = 678.53(10) \text{ \AA}^3$ ,  $Z = 2$ ,  $D_x = 1.538 \text{ g/cm}^3$ ,  $\mu = 3.019 \text{ mm}^{-1}$ . 31603 Reflections were measured on a Bruker D8 Venture diffractometer with sealed tube and Triumph monochromator ( $\lambda = 0.71073 \text{ \AA}$ ) up to a resolution of  $(\sin \theta/\lambda)_{\max} = 0.64 \text{ \AA}^{-1}$  at a temperature of 293(2) K. Data collection and reduction was done using the Bruker software suite APEX2.<sup>[6]</sup> Intensity data were integrated with the SAINT V8.27B software.<sup>[4]</sup> Absorption correction and scaling was performed based on multiple measured reflections with SADABS (0.5697 – 0.7728 correction range).<sup>[4]</sup> 5756 Reflections were unique ( $R_{\text{int}} = 0.0311$ ), of which 4785 were observed [ $I > 2\sigma(I)$ ]. The structure was solved with Direct Methods using the program SHELXS-97<sup>[5]</sup> and refined with SHELXL-97<sup>[7]</sup> against  $F^2$  of all reflections. All non-hydrogen atoms were refined with anisotropic displacement parameters. Hydrogen atoms were located in difference Fourier maps and refined with a riding model. 319 Parameters were refined with 17 restraints.  $R1/wR2$  [ $I > 2\sigma(I)$ ]: 0.0552 / 0.1339.  $R1/wR2$  [all refl.]: 0.0675 / 0.1434.  $S = 1.046$ . Flack parameter<sup>[8]</sup>  $x = 0.007(11)$ . Residual electron density between  $-0.27$  and  $1.17 \text{ e/\AA}^3$ . Geometry calculations and checking for higher symmetry was performed with the PLATON program.<sup>[9]</sup>

### Crystal structure determination of 4a

Crystal data.  $C_{17}H_{17}NO$ , Fw = 251.32, colourless plate,  $0.27 \times 0.10 \times 0.03 \text{ mm}^3$ , orthorhombic,  $P2_12_12_1$  (no. 19),  $a = 8.2349(3)$ ,  $b = 12.5658(4)$ ,  $c = 12.9900(5) \text{ \AA}$ ,  $V = 1344.18(8) \text{ \AA}^3$ ,  $Z = 4$ ,  $D_x = 1.242 \text{ g/cm}^3$ ,  $\mu = 0.077 \text{ mm}^{-1}$ . 55490 Reflections were measured on a Bruker D8 Venture diffractometer with sealed tube and Triumph monochromator ( $\lambda = 0.71073 \text{ \AA}$ ) up to a resolution of  $(\sin \theta/\lambda)_{\max} = 0.64 \text{ \AA}^{-1}$  at a temperature of 100(2) K. Data collection and reduction was done using the Bruker software suite APEX2.<sup>[4]</sup> Intensity data were integrated with the SAINT V8.27B software.<sup>[4]</sup> Absorption correction and scaling was performed based on multiple measured reflections with SADABS (0.9796 – 0.9977 correction range). 2992 Reflections were unique ( $R_{\text{int}} = 0.0321$ ), of which 2861 were observed [ $I > 2\sigma(I)$ ]. The structure was solved with Direct Methods using the program SHELXS-97<sup>[5]</sup> and refined with SHELXL-97<sup>[5]</sup> against  $F^2$  of all reflections. All non-hydrogen atoms were refined with anisotropic displacement parameters. Hydrogen atoms were located in difference Fourier maps and refined with a riding model. 173 Parameters were refined with no restraints.  $R1/wR2$  [ $I > 2\sigma(I)$ ]: 0.0325 / 0.0820.  $R1/wR2$  [all refl.]: 0.0347 / 0.836.  $S = 1.090$ . Residual electron density between  $-0.30$  and  $0.29 \text{ e/\AA}^3$ . Geometry calculations and checking for higher symmetry was performed with the PLATON program.<sup>[7]</sup>

---

[6] Bruker, (2012). *APEX2* (v2012.4-3), *SAINT* (Version 8.27B) and *SADABS* (Version 2012/1). Bruker AXS Inc., Madison, Wisconsin, USA.

[7] G. M. Sheldrick, *Acta Cryst.* **2008**, *A64*, 112.

[8] H. D. Flack, *Acta Cryst.* **1983**, *A39*, 876.

[9] A. L. Spek, *Acta Cryst.* **2009**, *D65*, 148.

# Determination of the relative configuration of 4a and 4d by NOESY

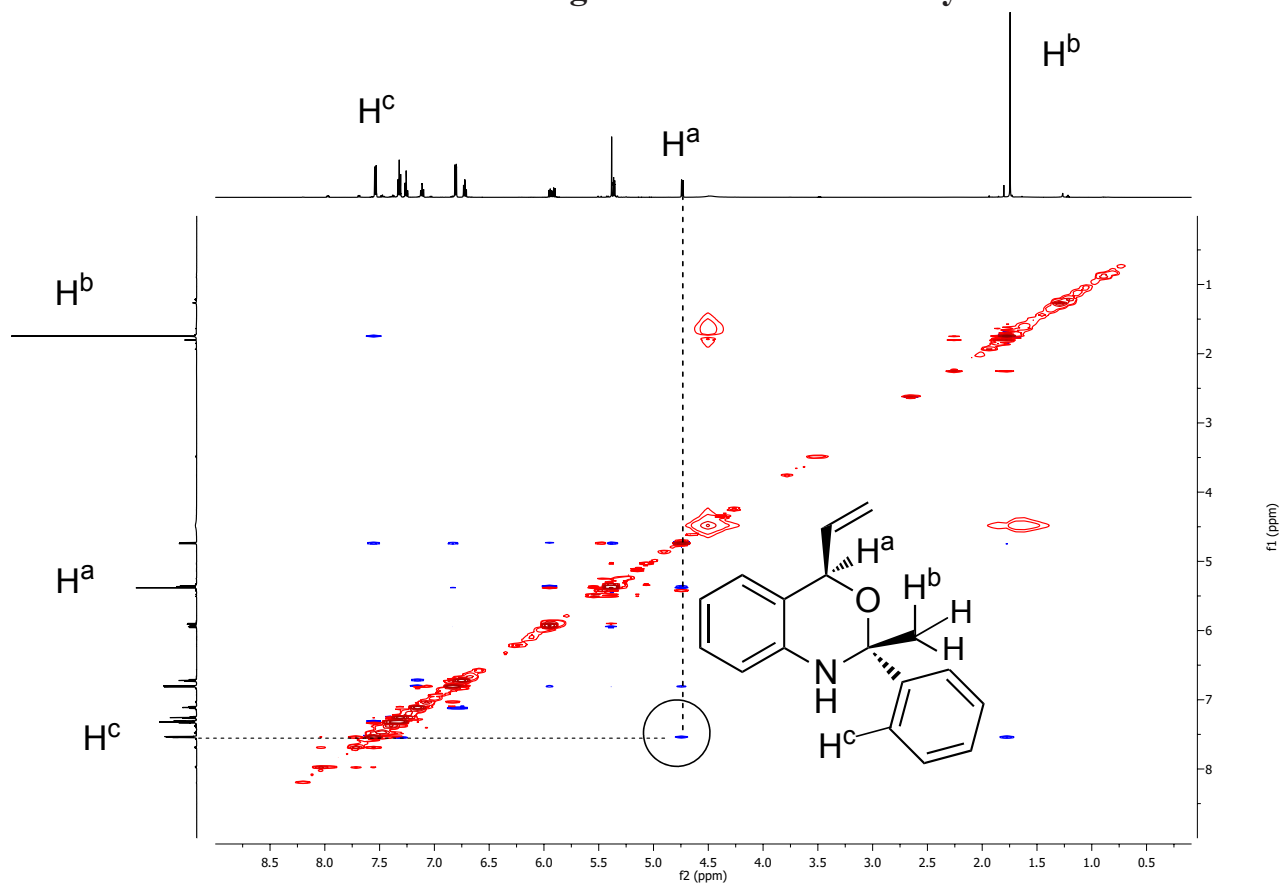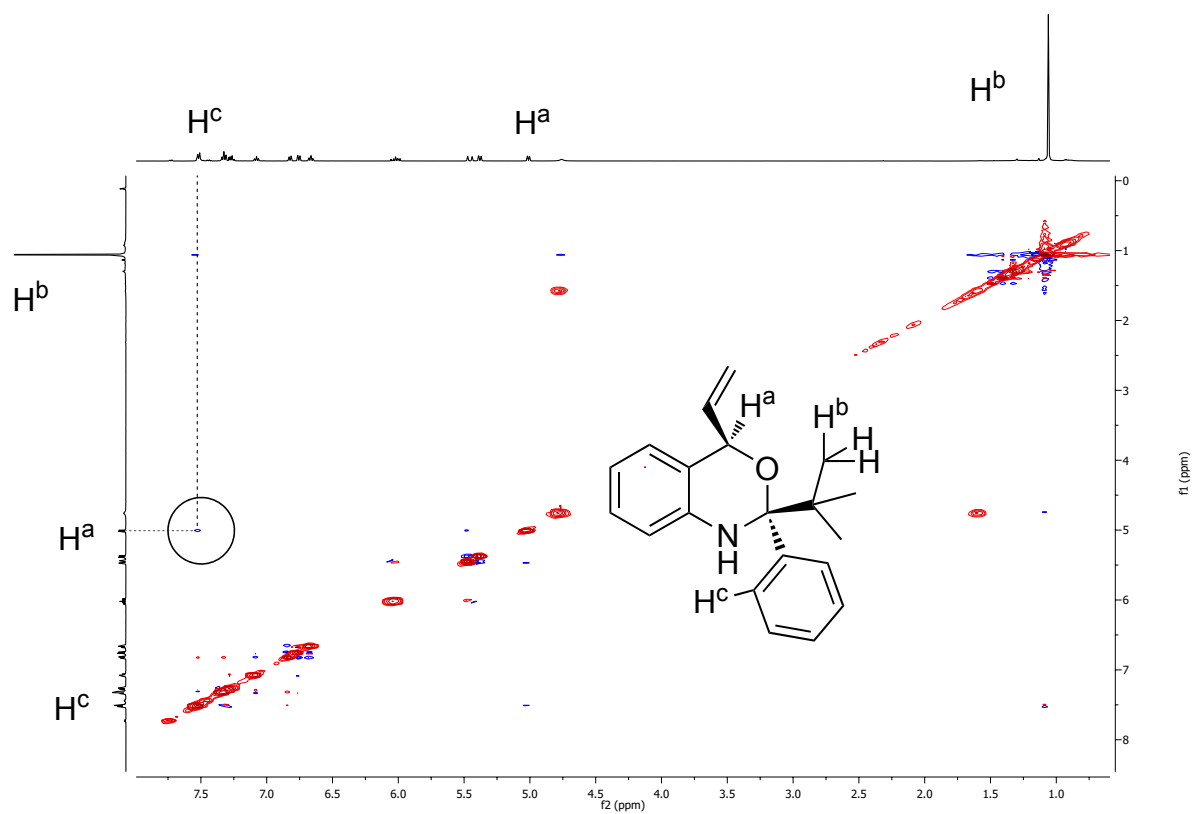

## Copies of NMR spectra

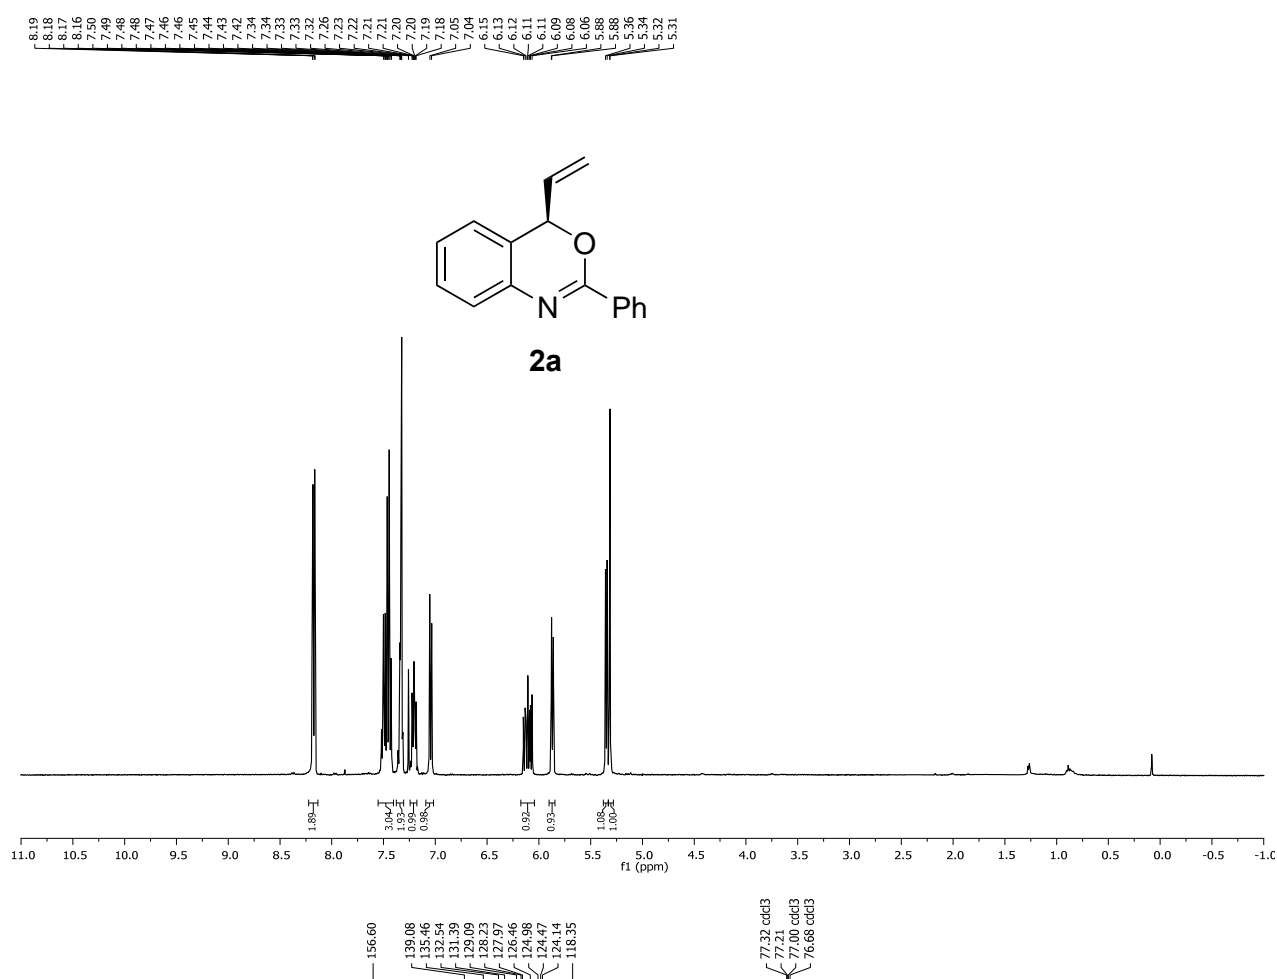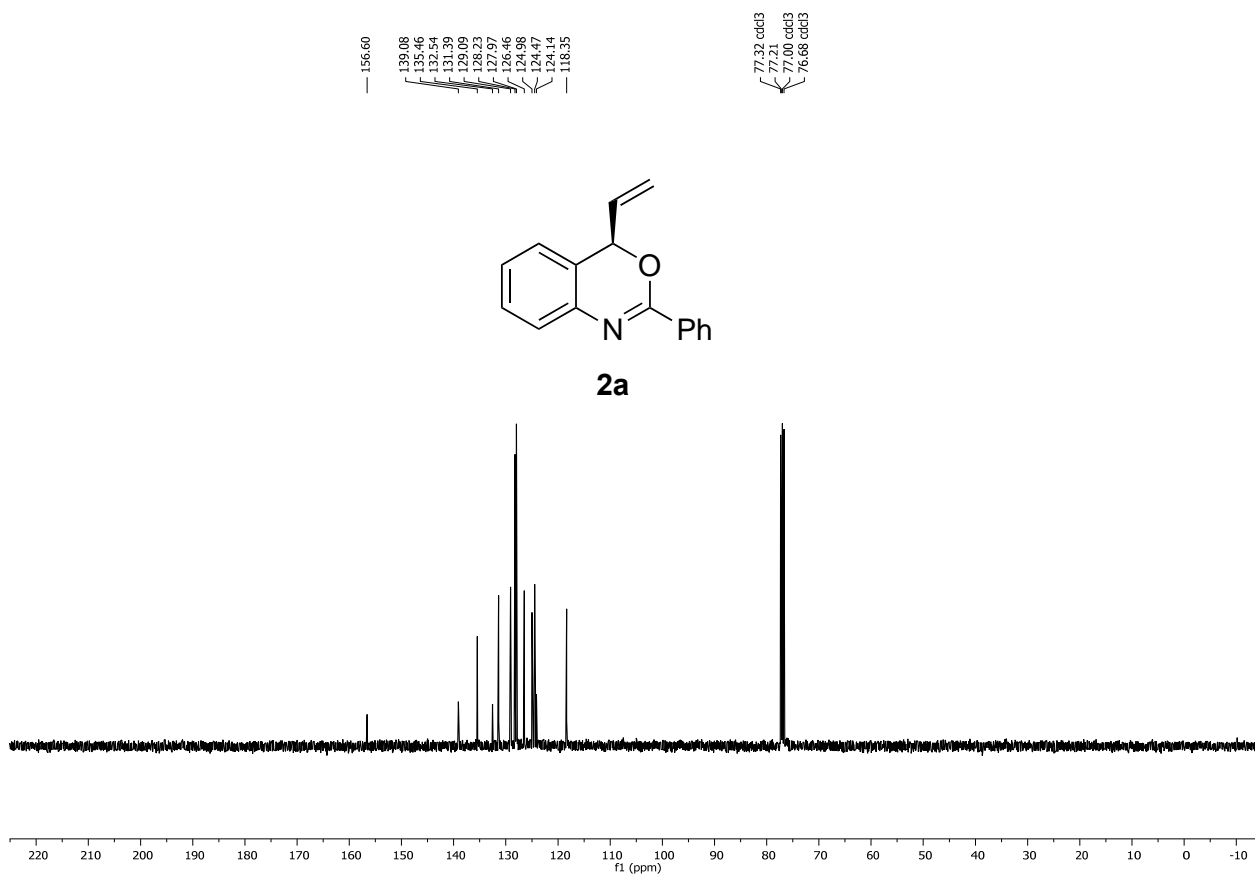

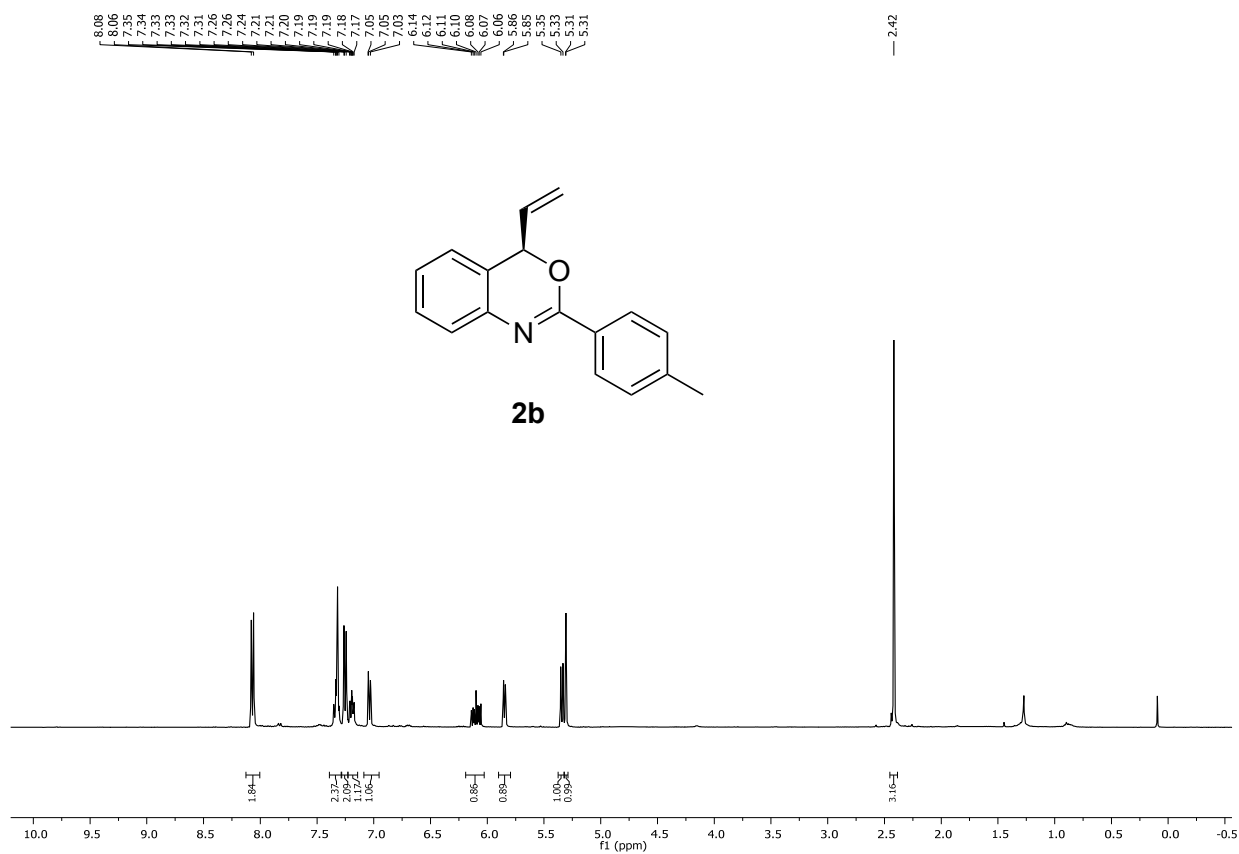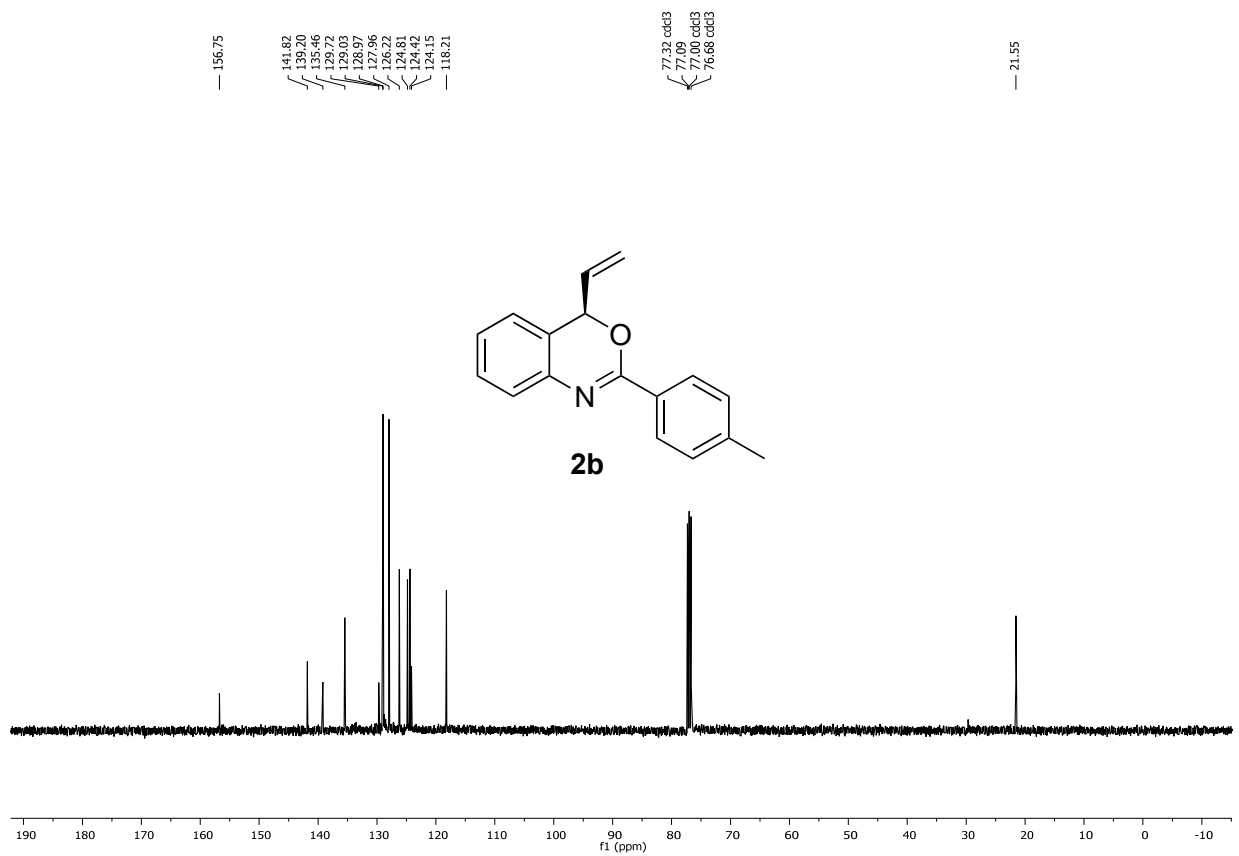

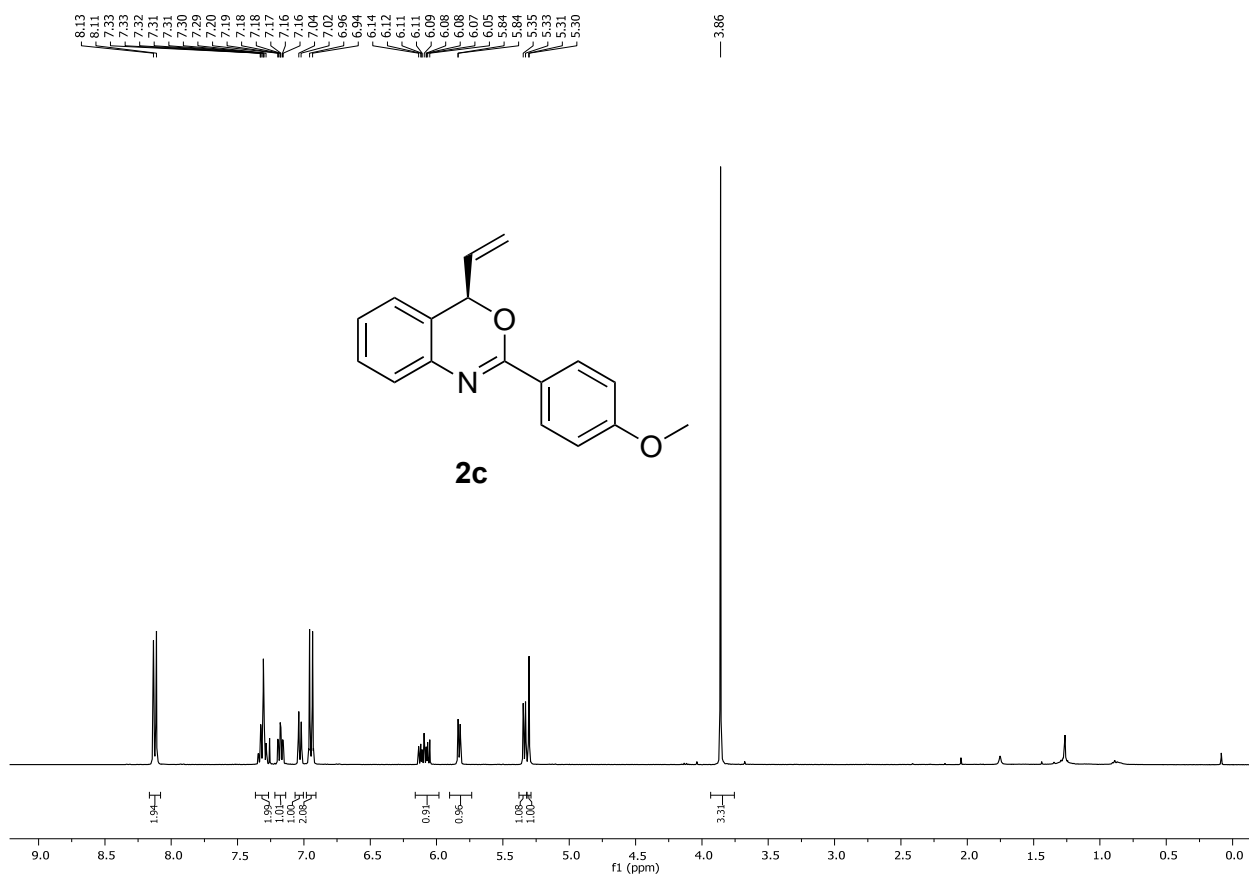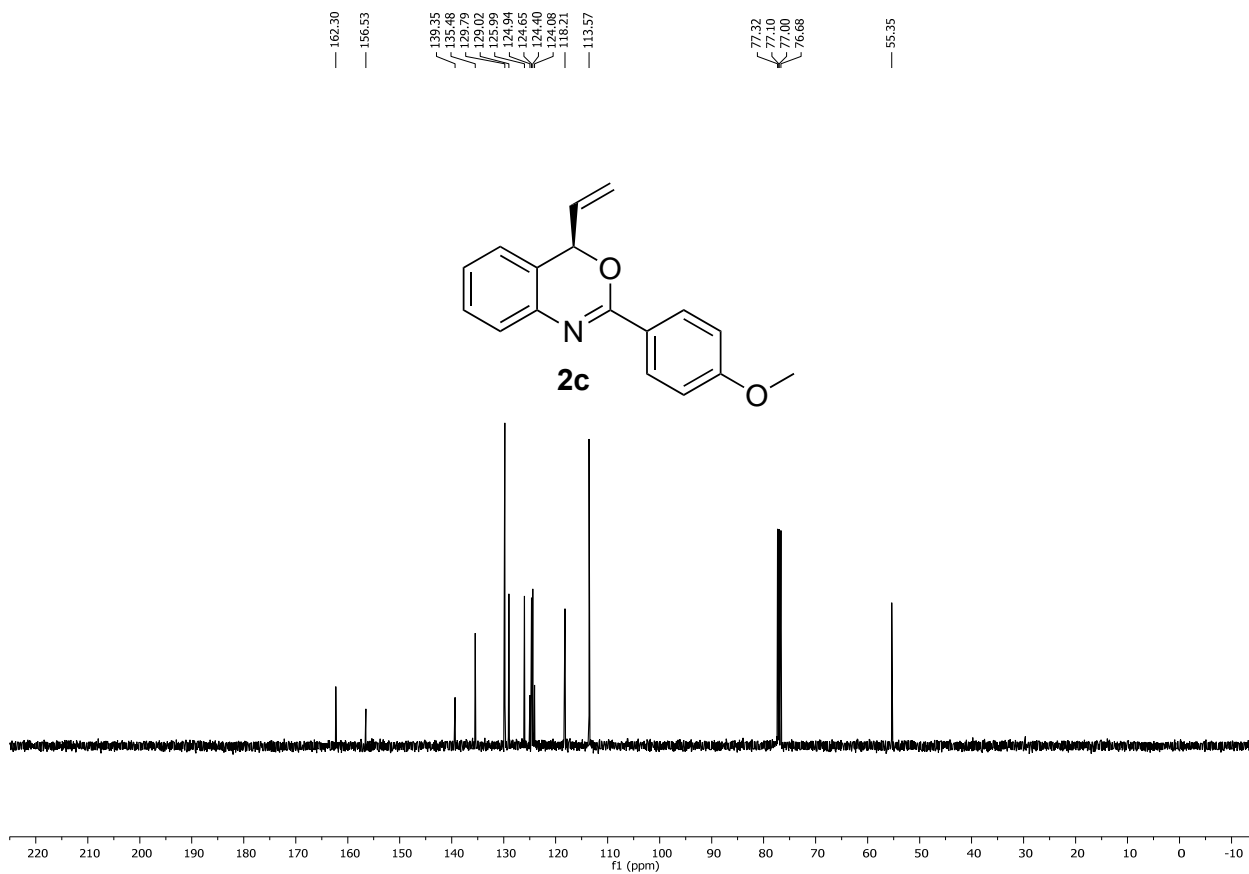

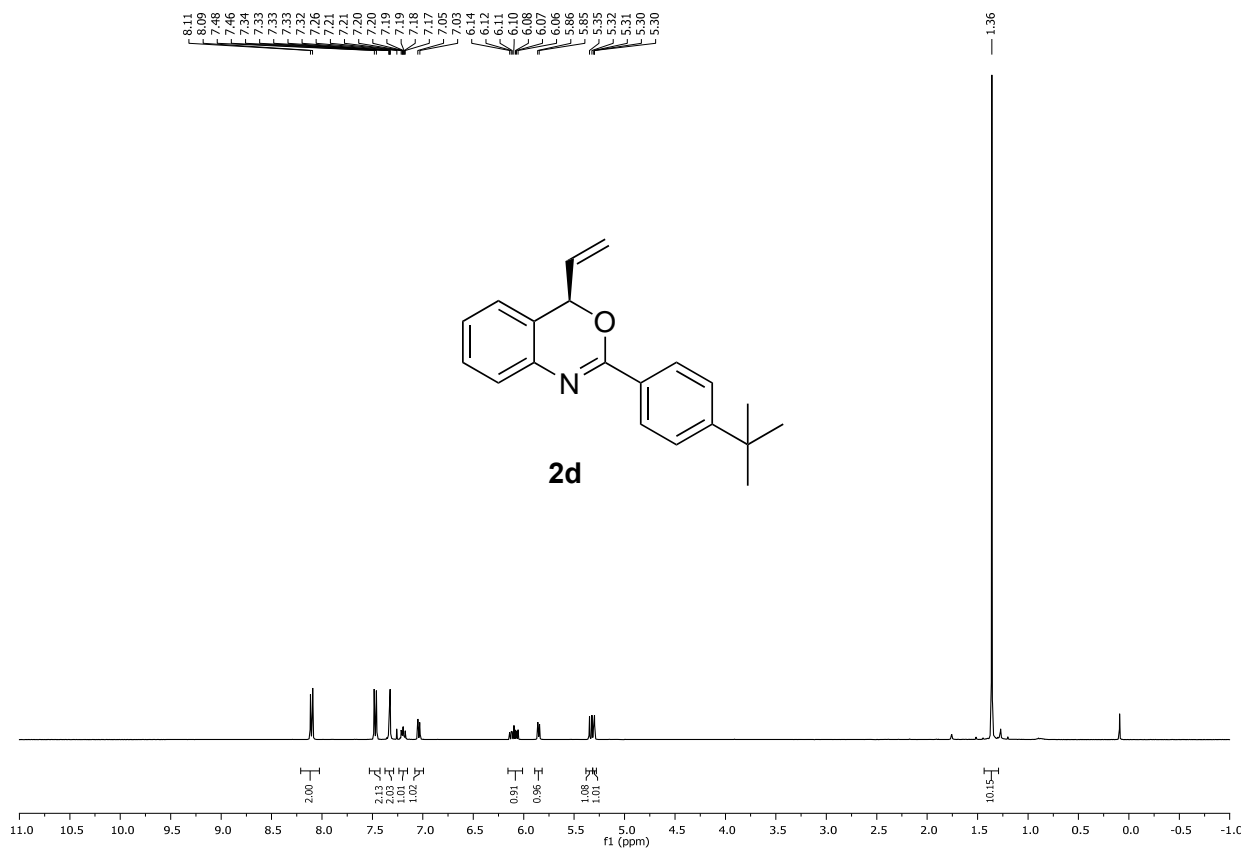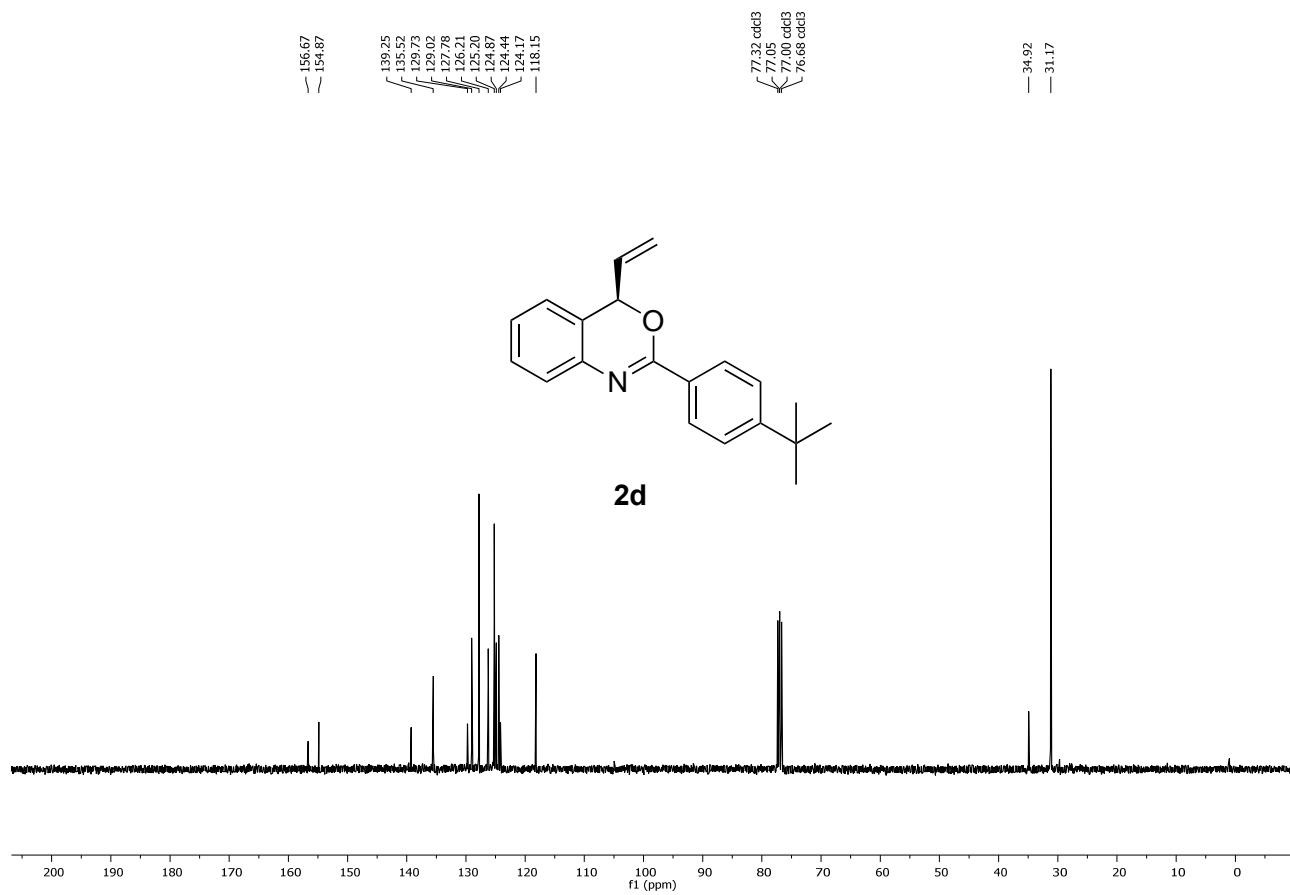

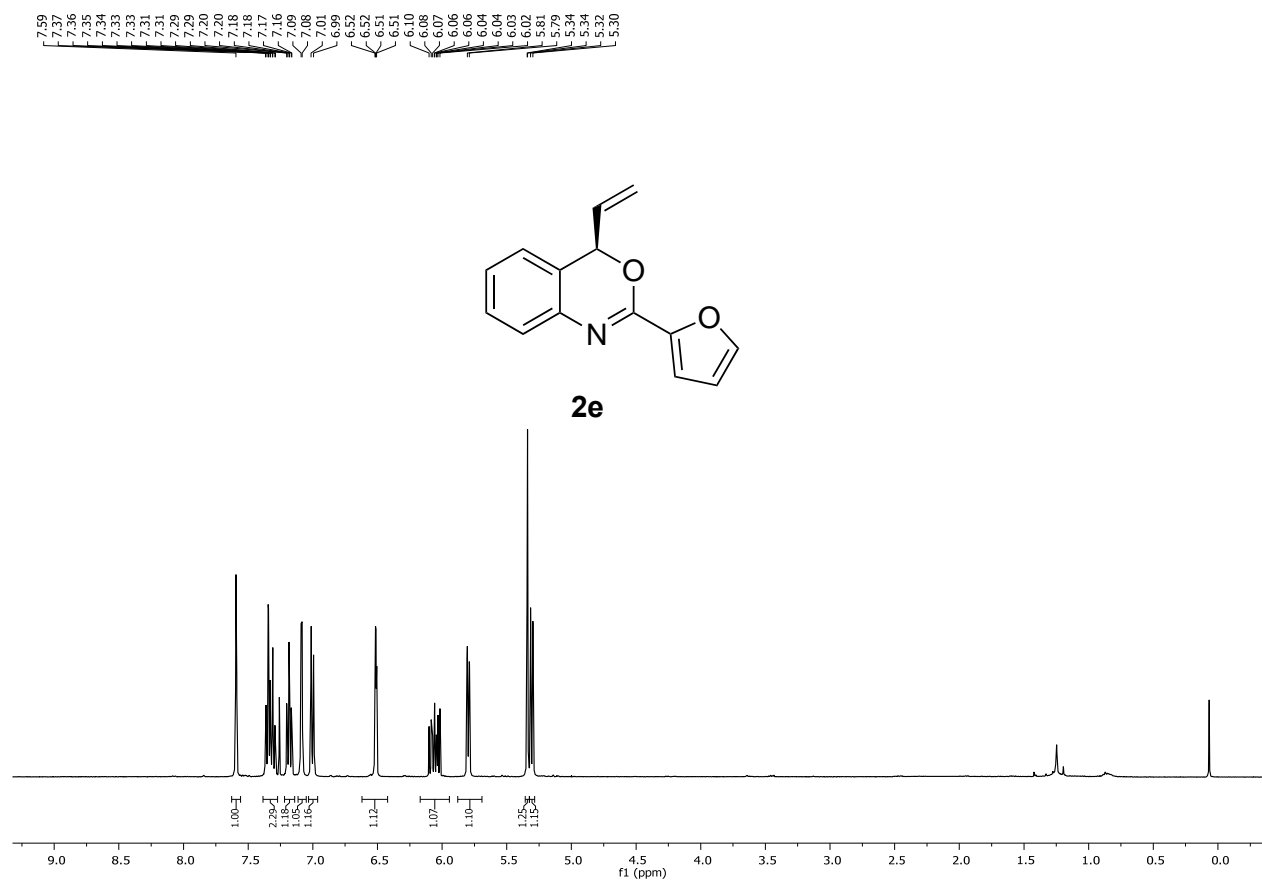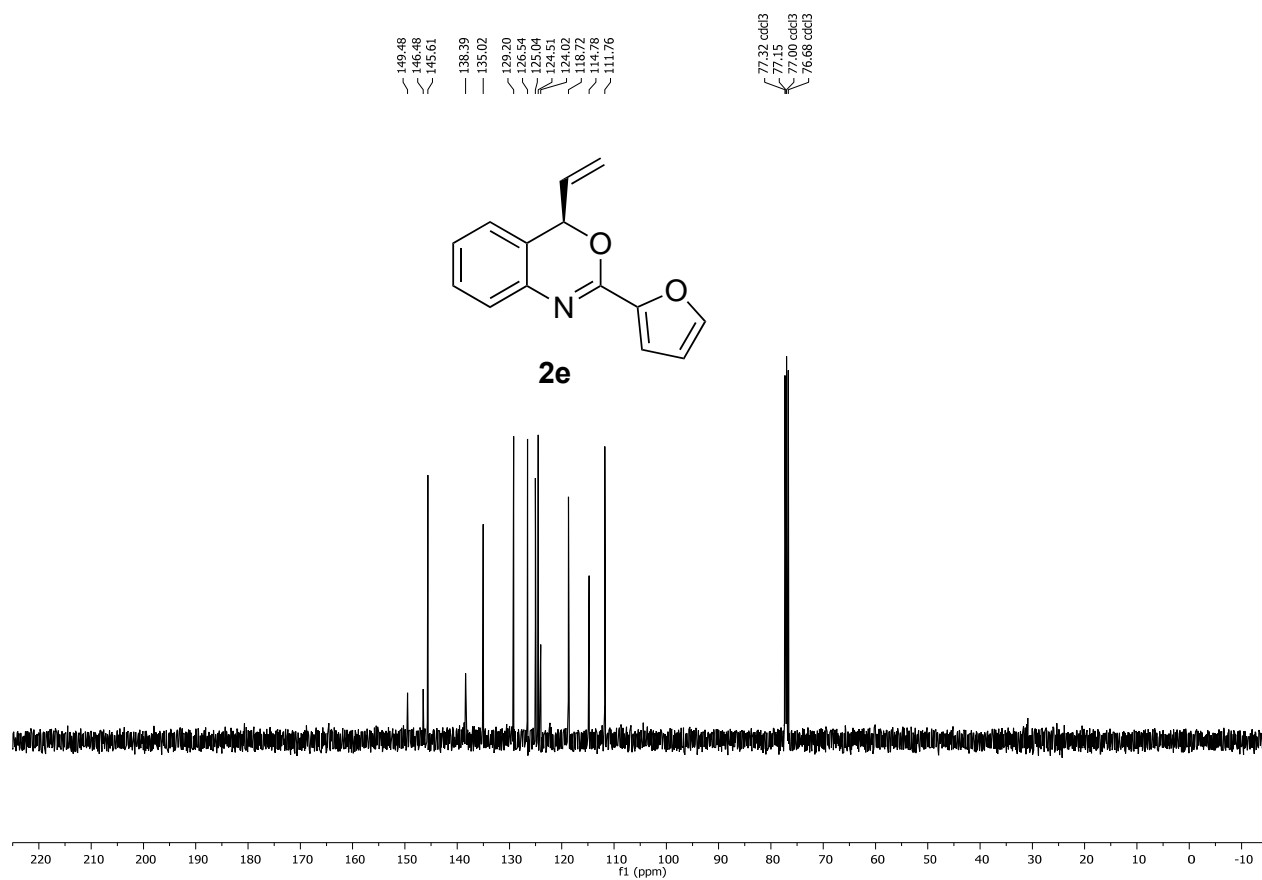

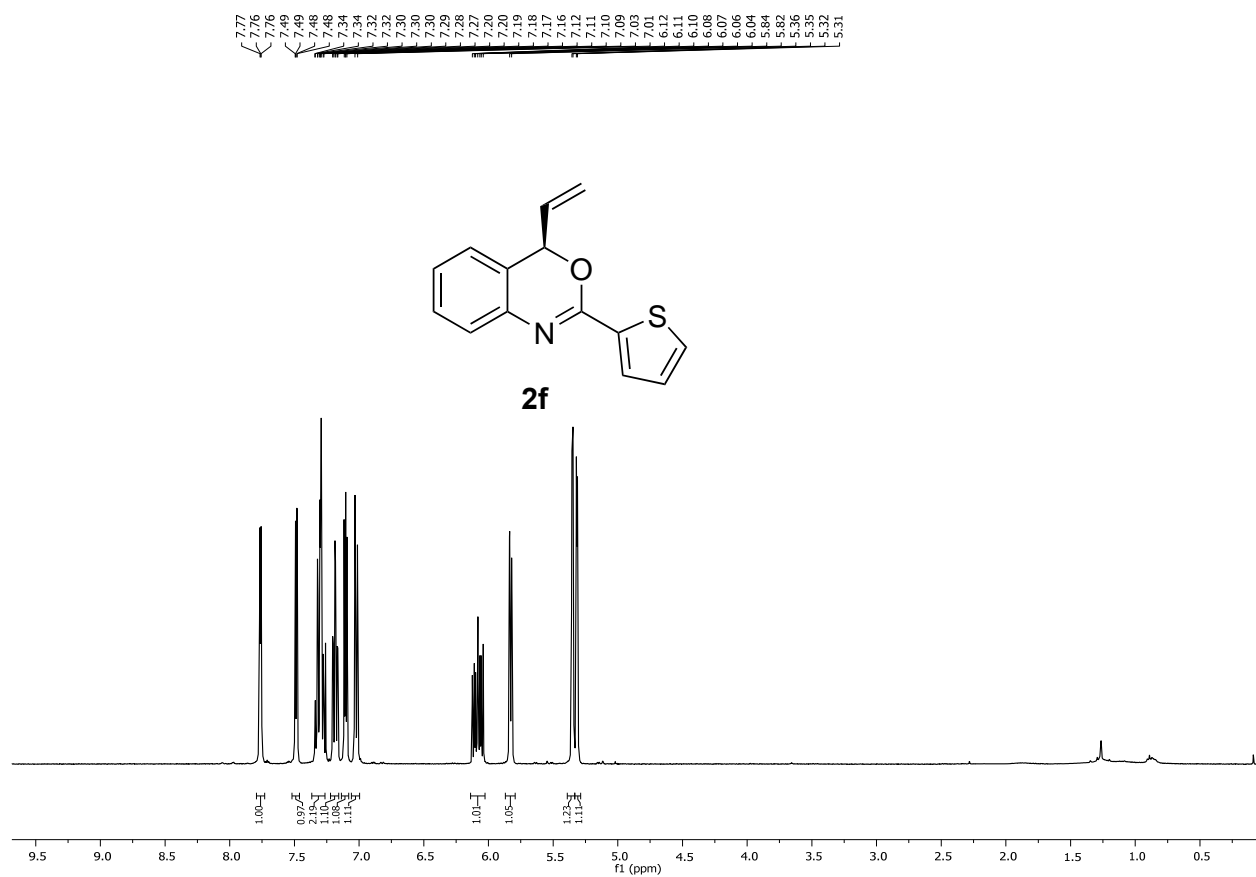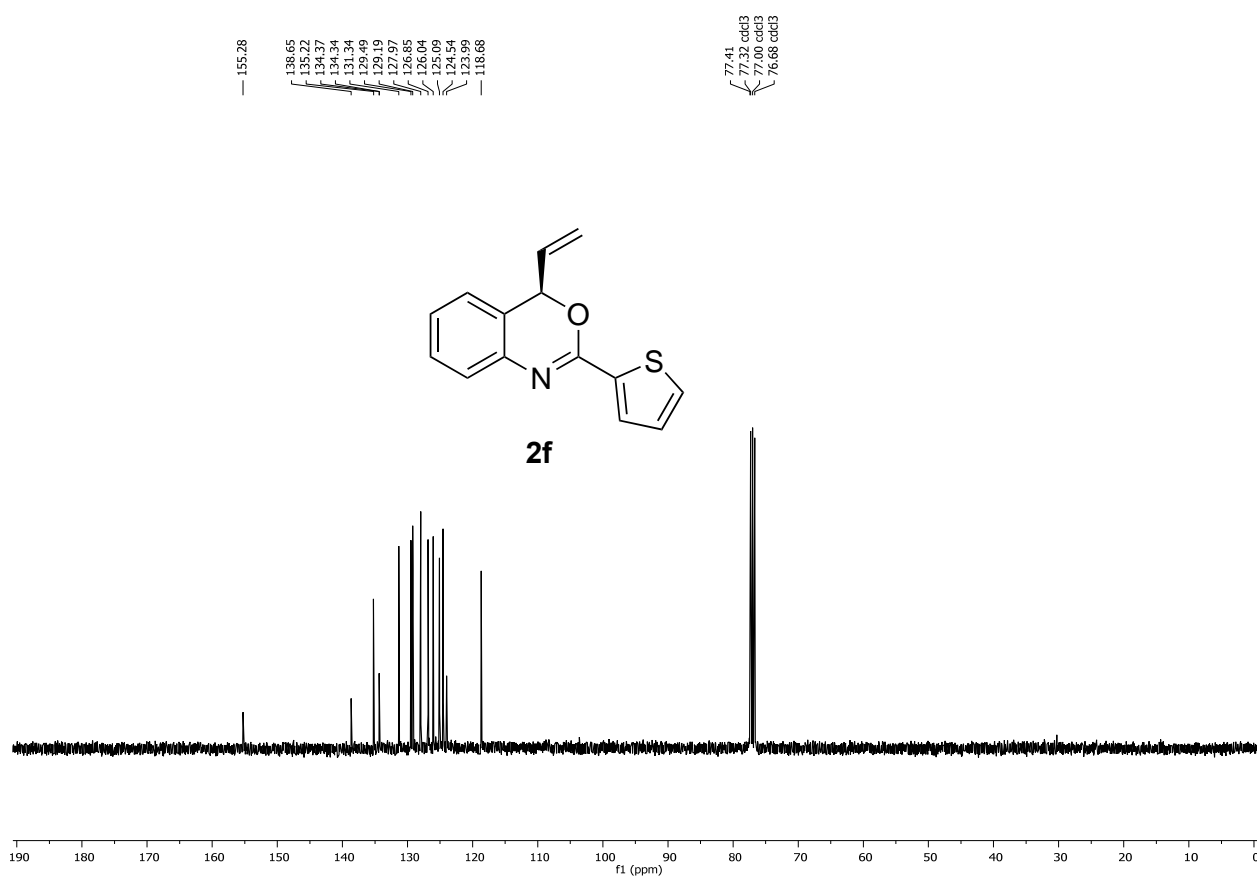

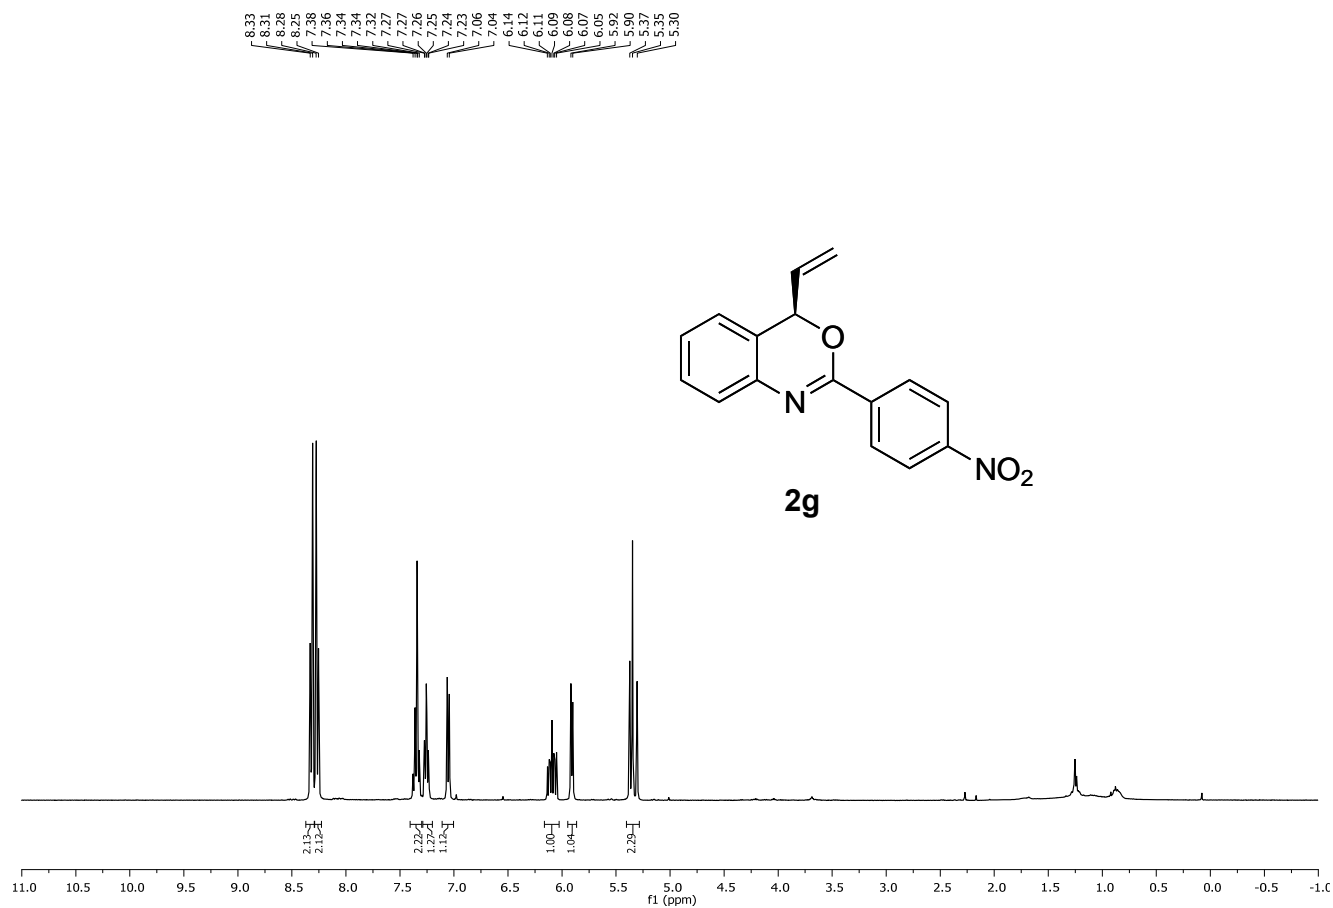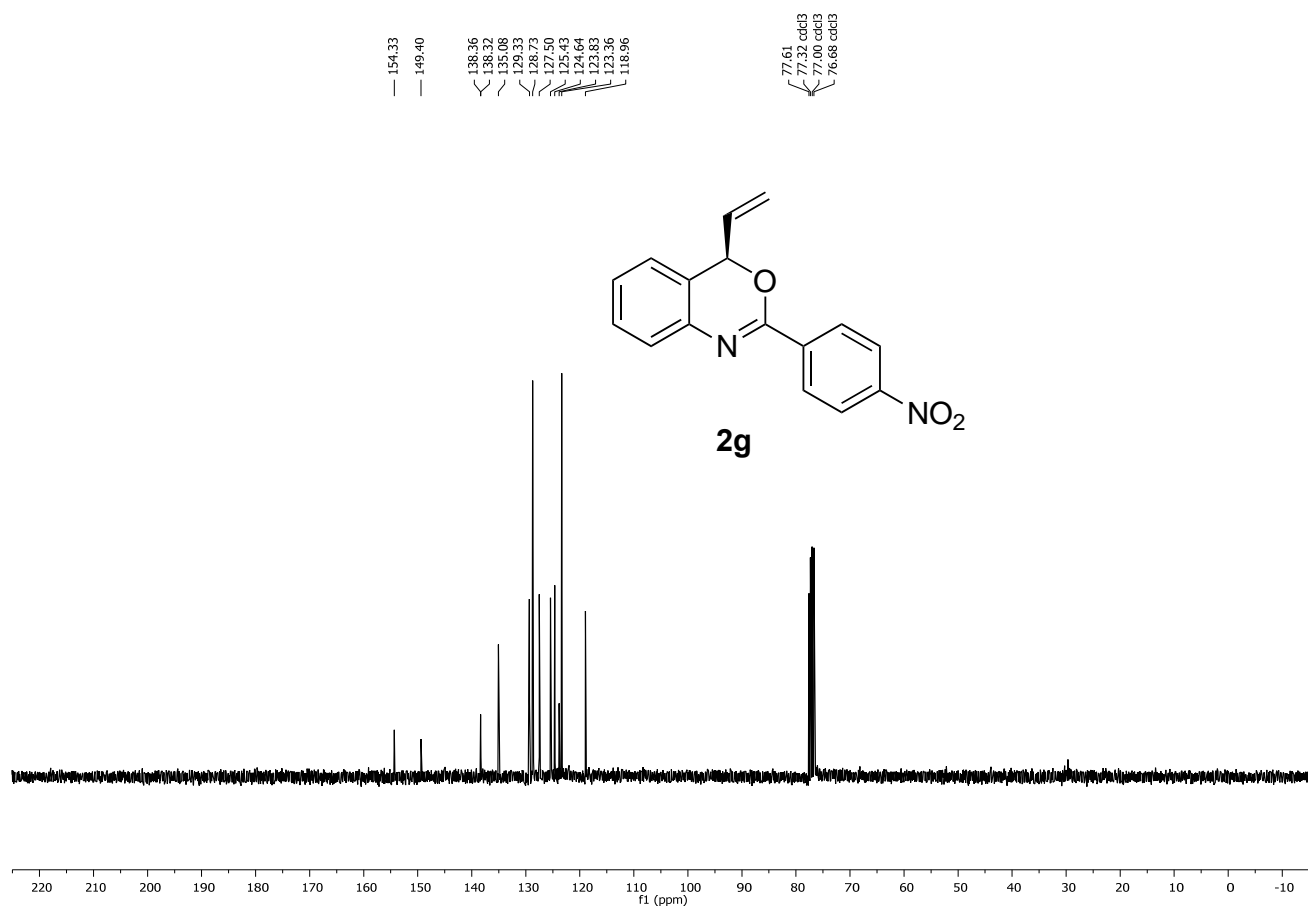

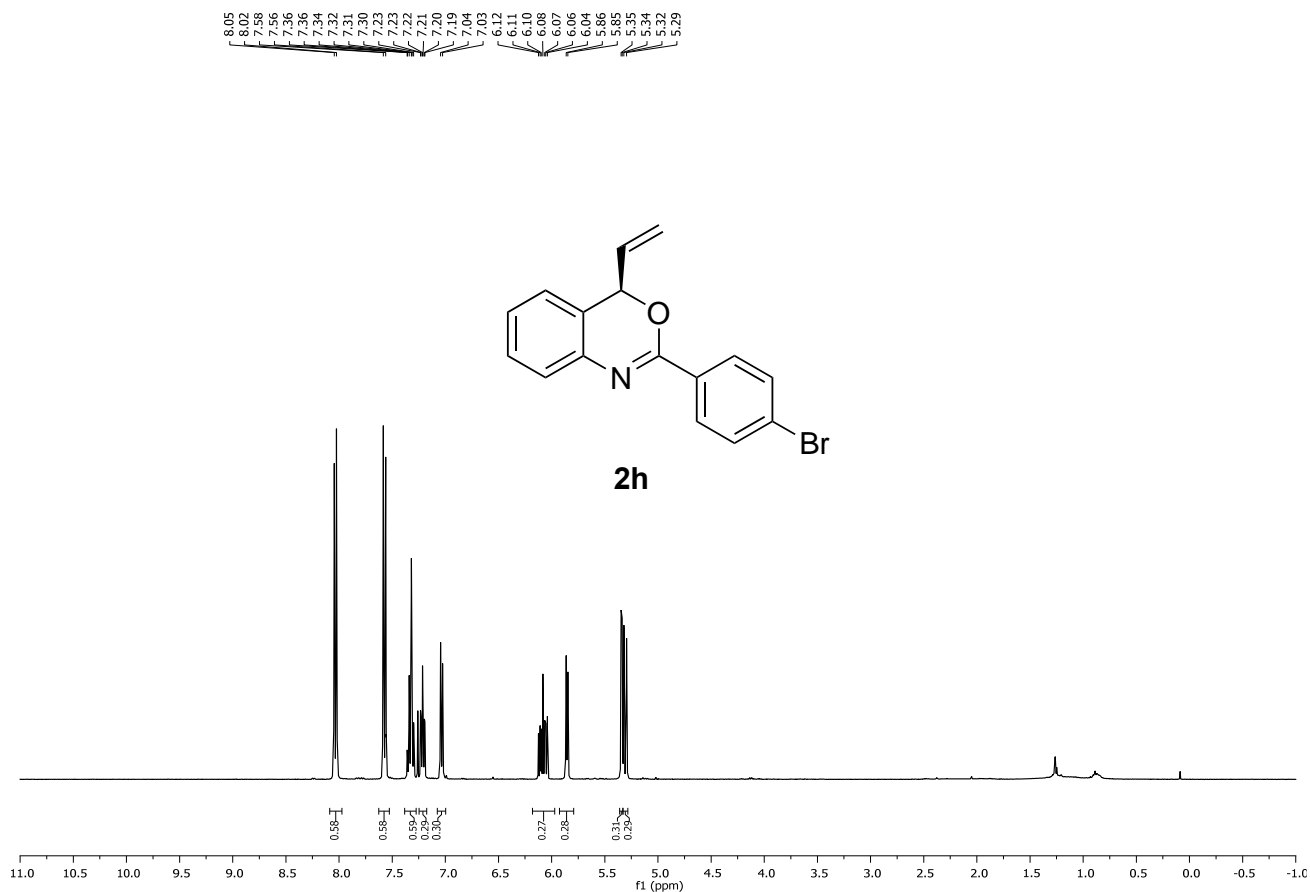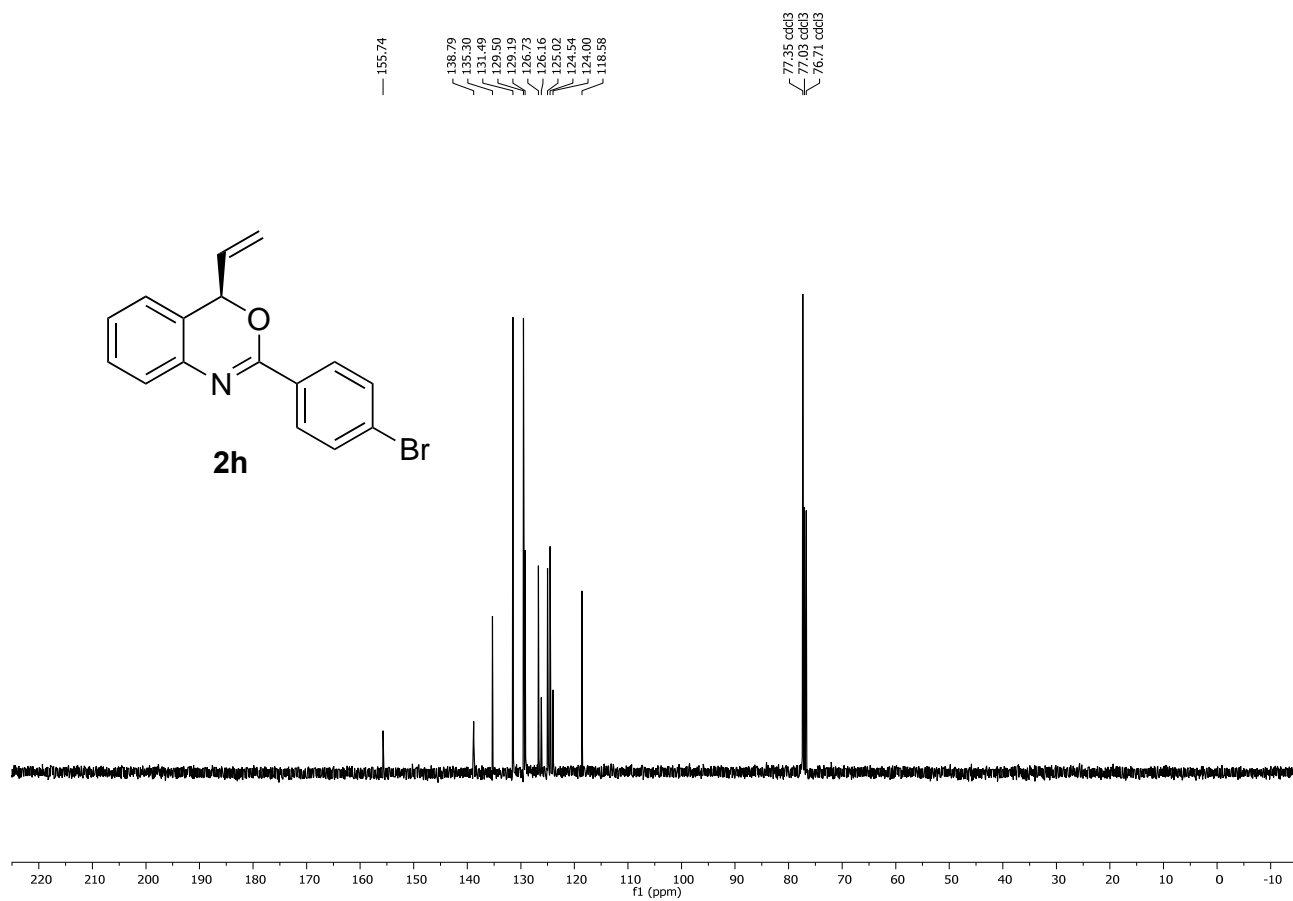

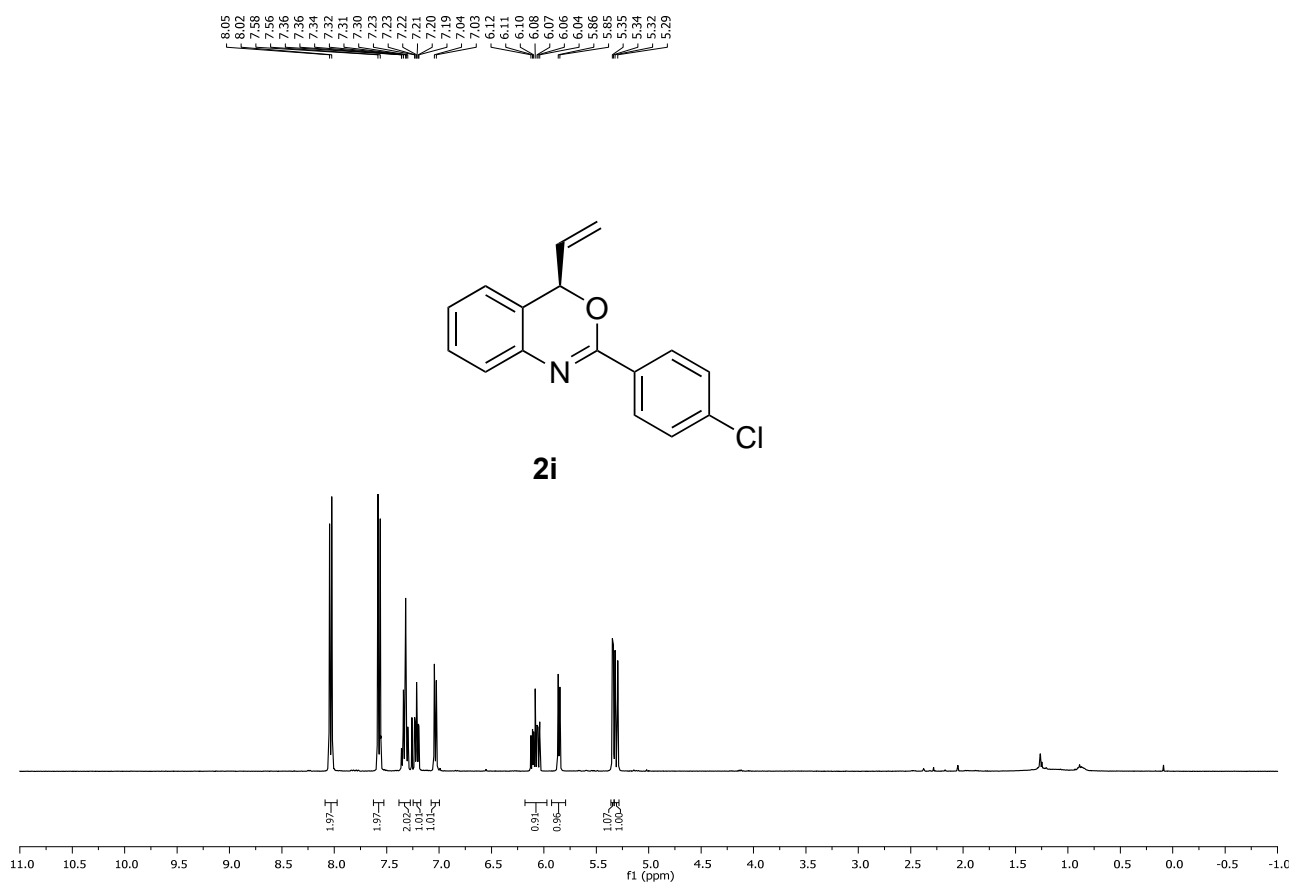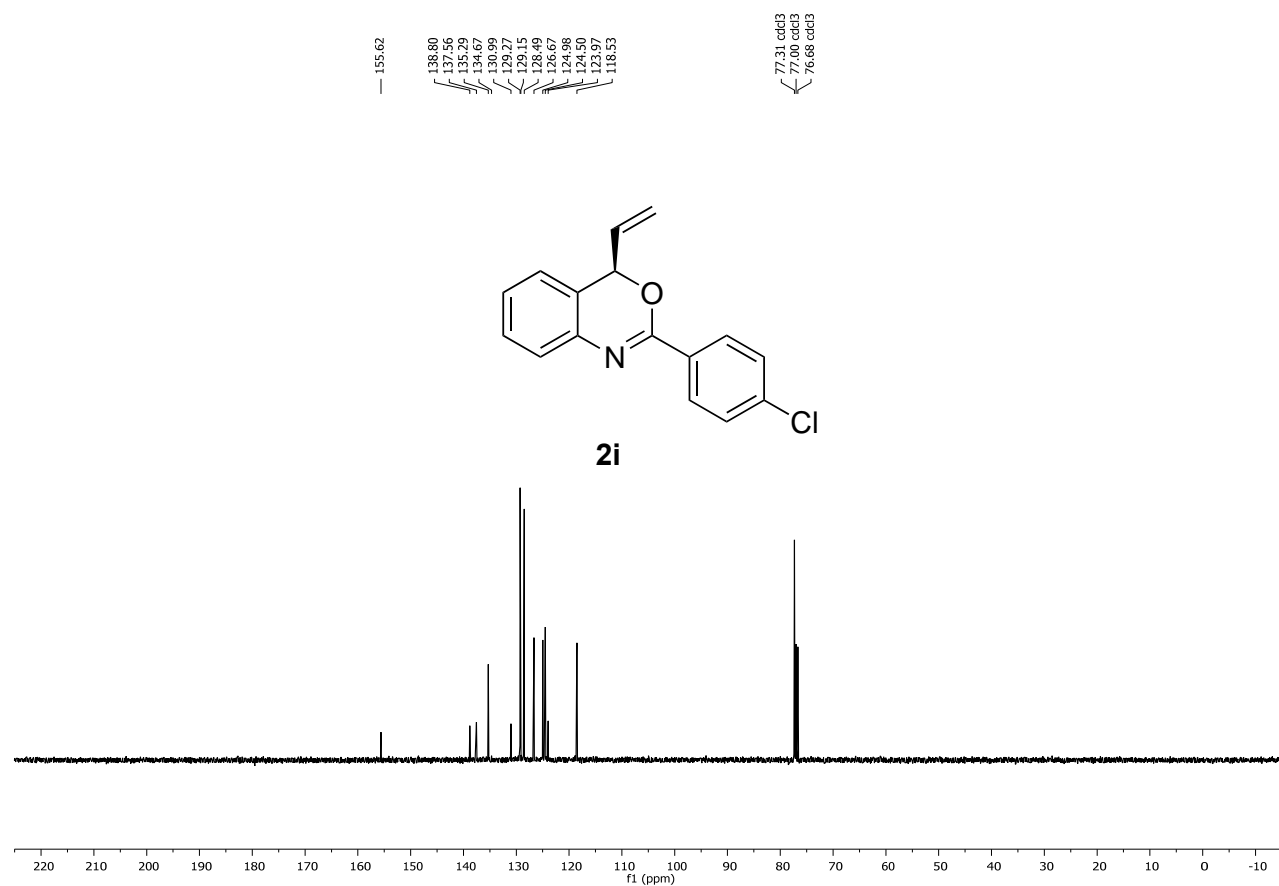

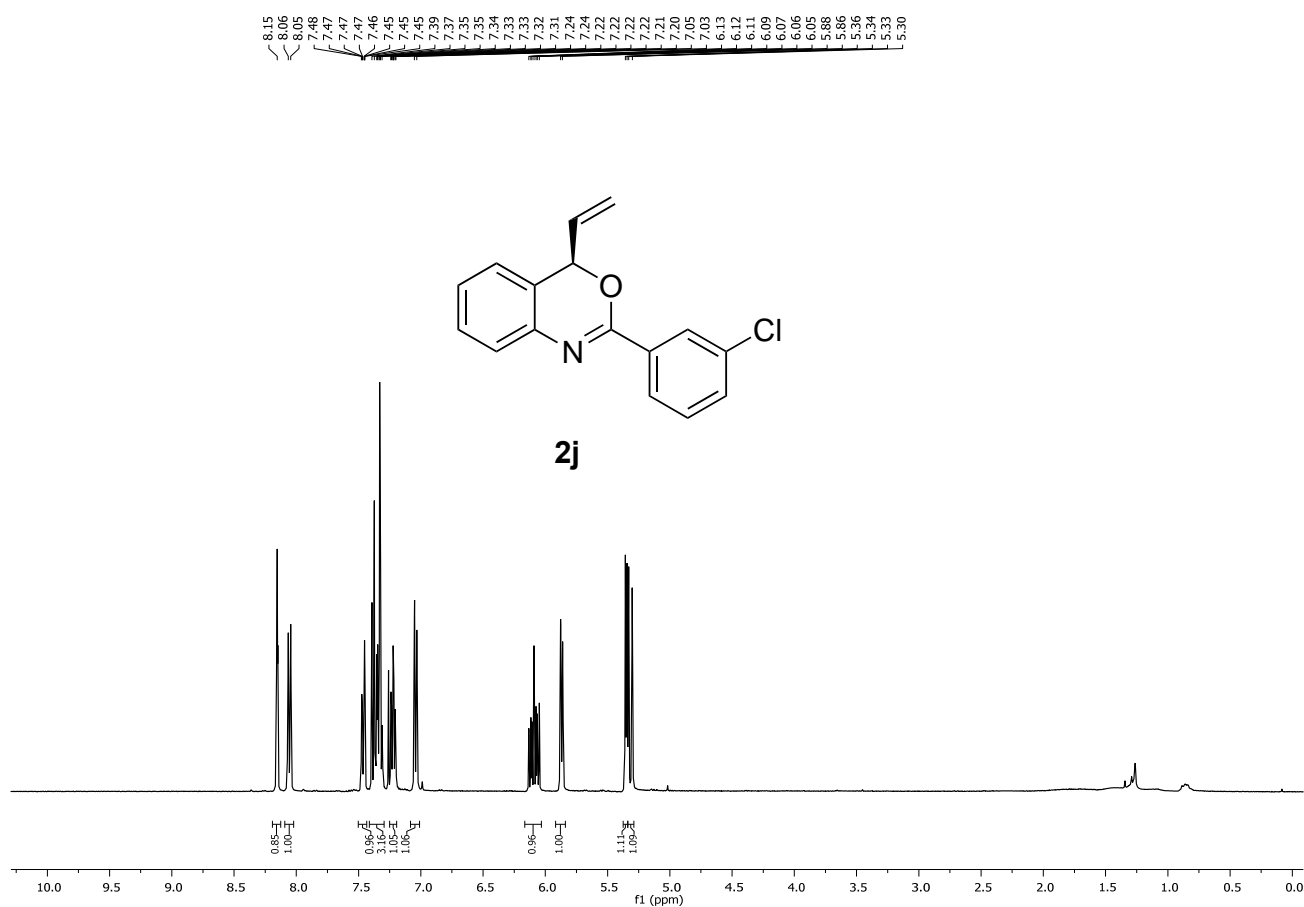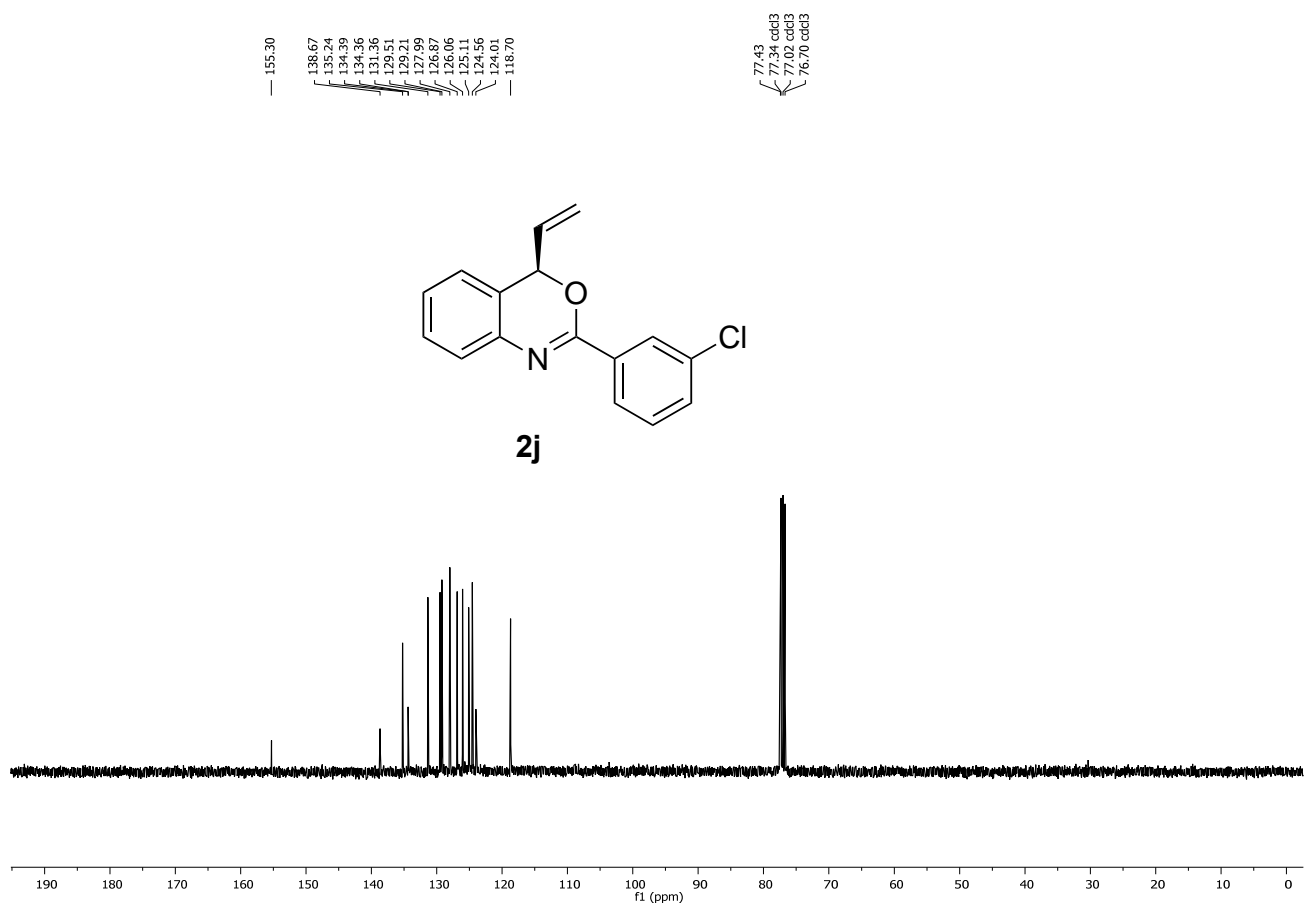

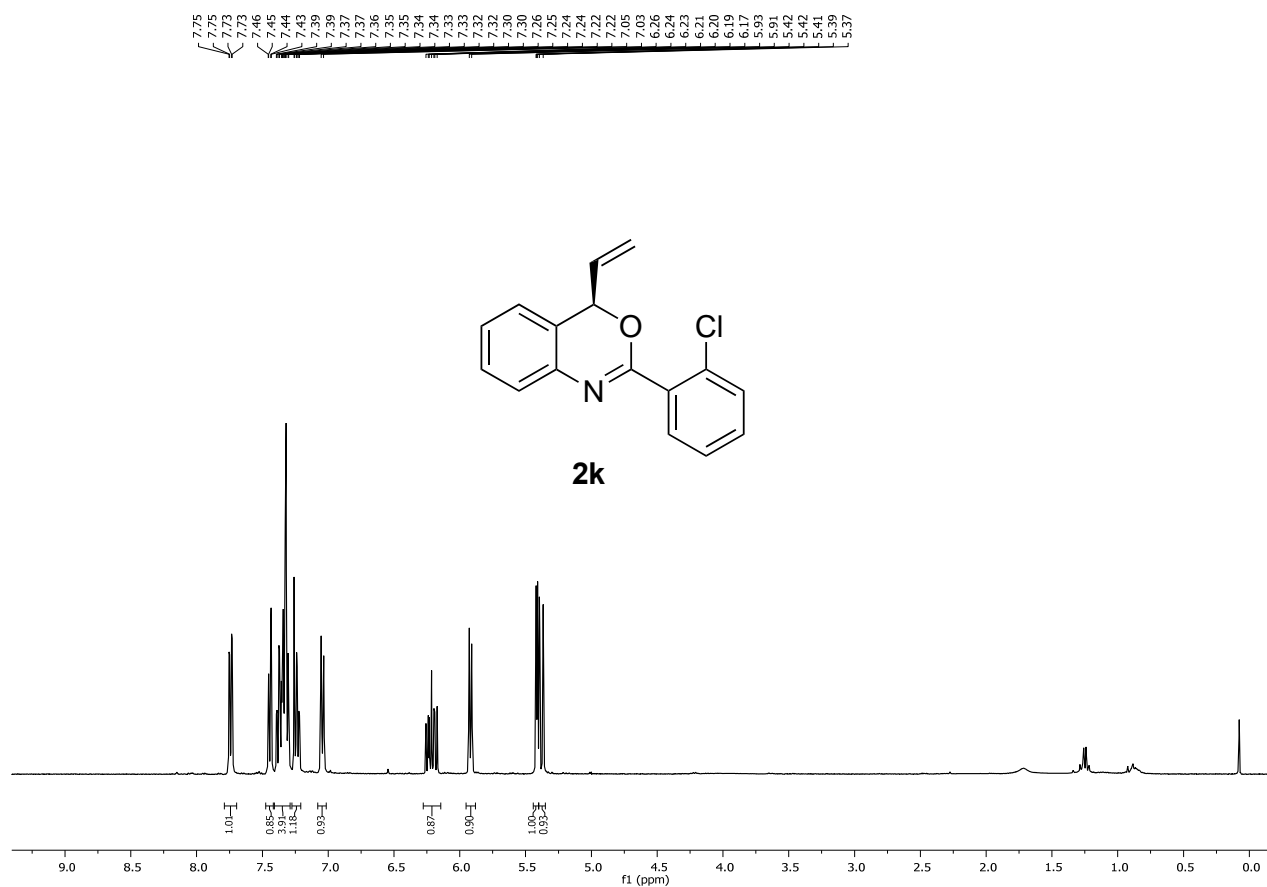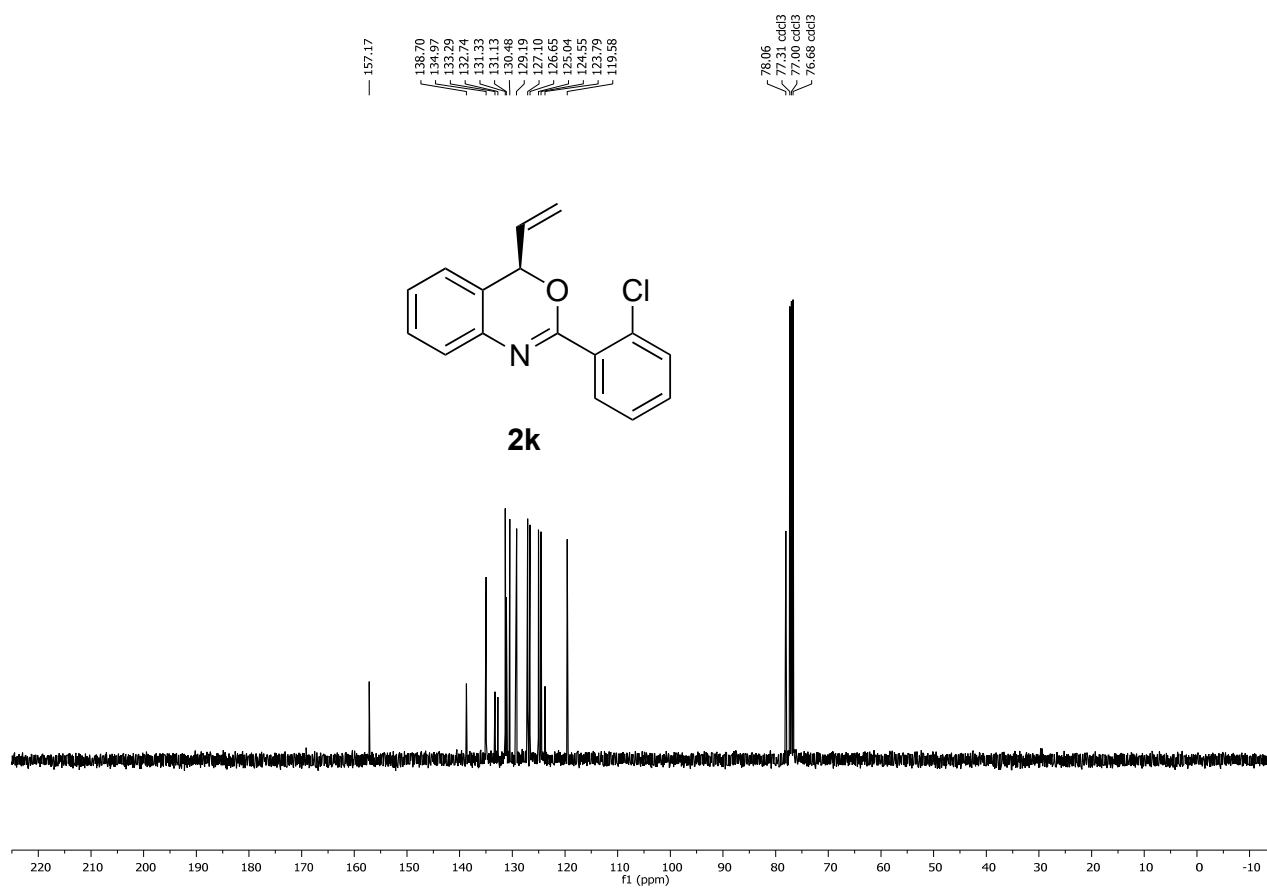

8.16  
8.14  
7.53  
7.51  
7.49  
7.46  
7.45  
7.43  
7.31  
7.30  
7.28  
7.28  
7.26  
7.24  
7.03  
7.02  
6.12  
6.10  
6.09  
6.08  
6.06  
6.05  
6.03  
5.82  
5.80  
5.39  
5.36  
5.34

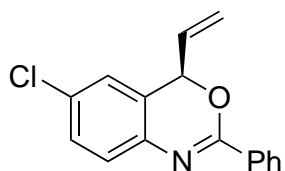

2I

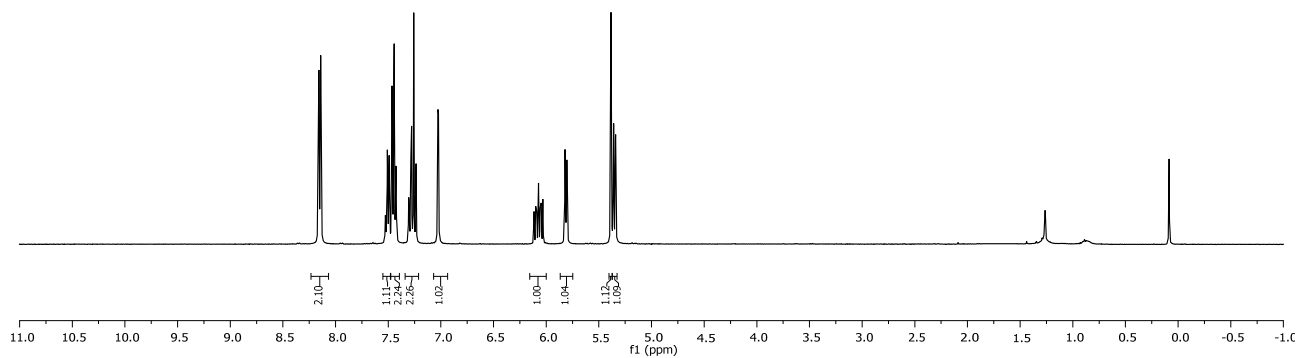

156.78

137.75  
134.72  
132.13  
131.61  
129.63  
129.14  
128.27  
127.97  
126.25  
125.61  
124.57  
119.12

77.32 cdd3  
77.00 cdd3  
76.86 cdd3  
76.68 cdd3

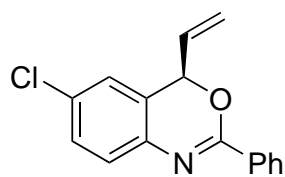

2I

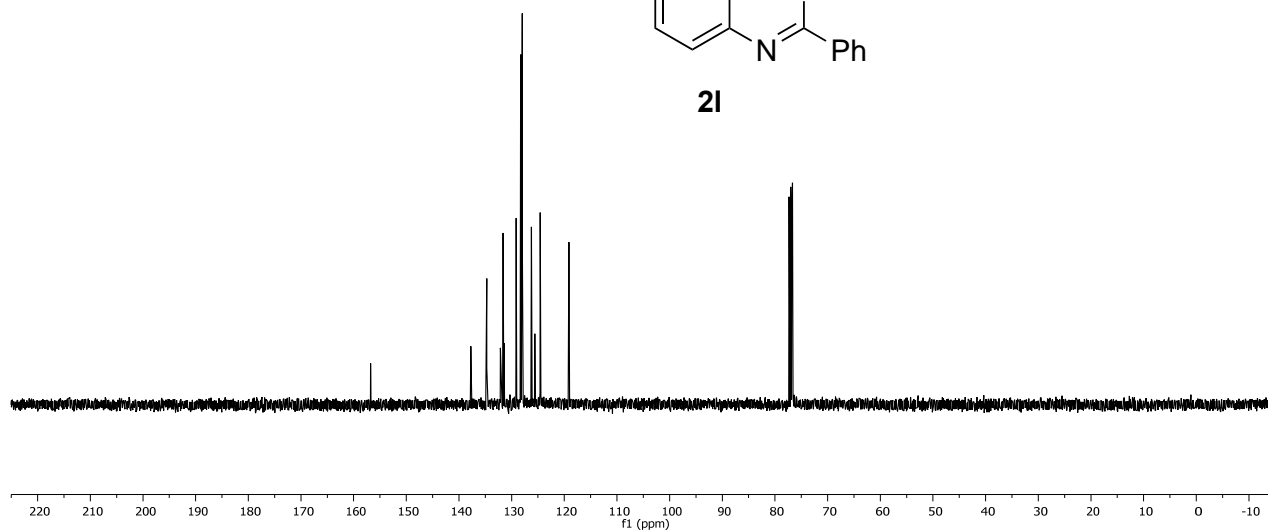

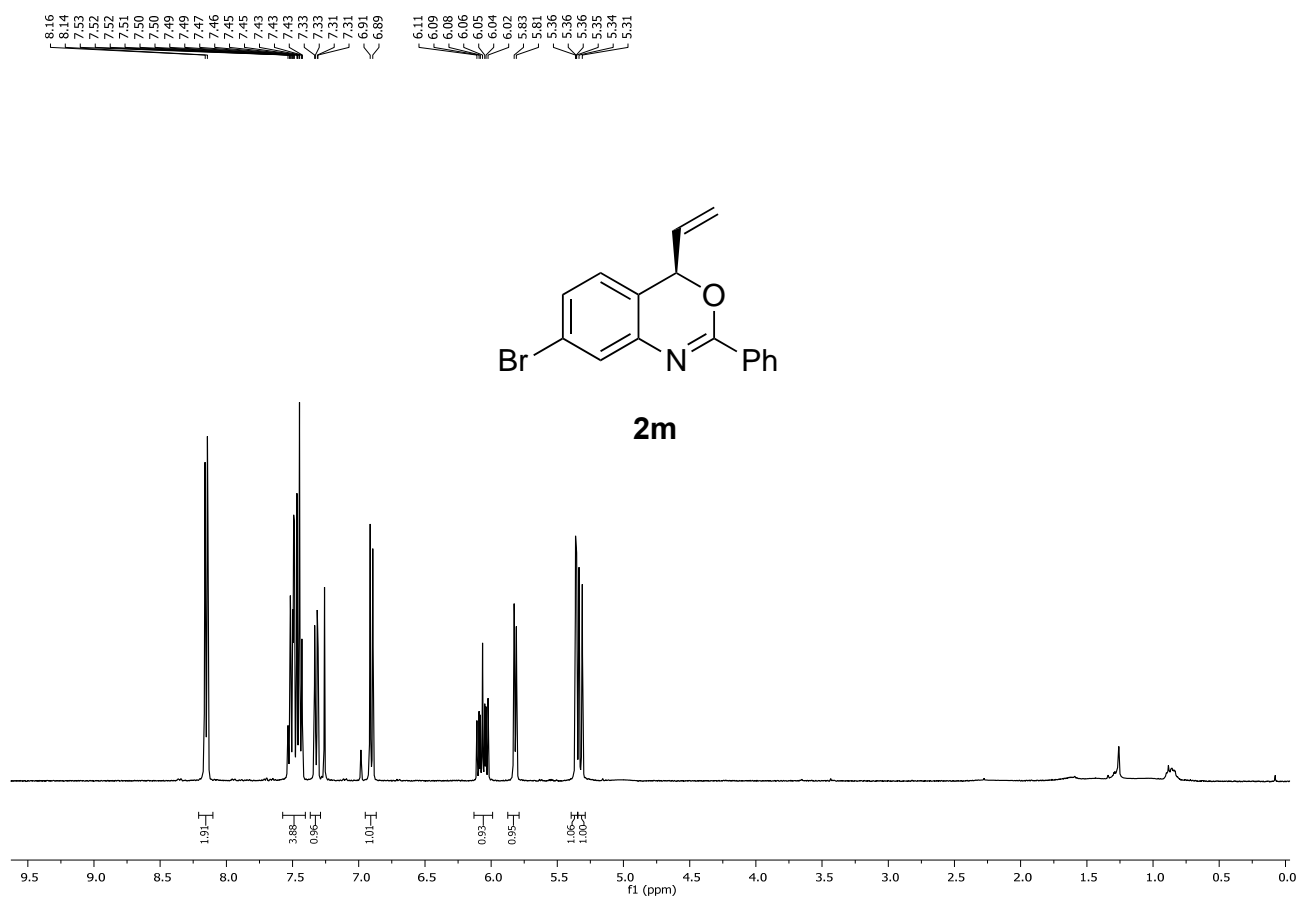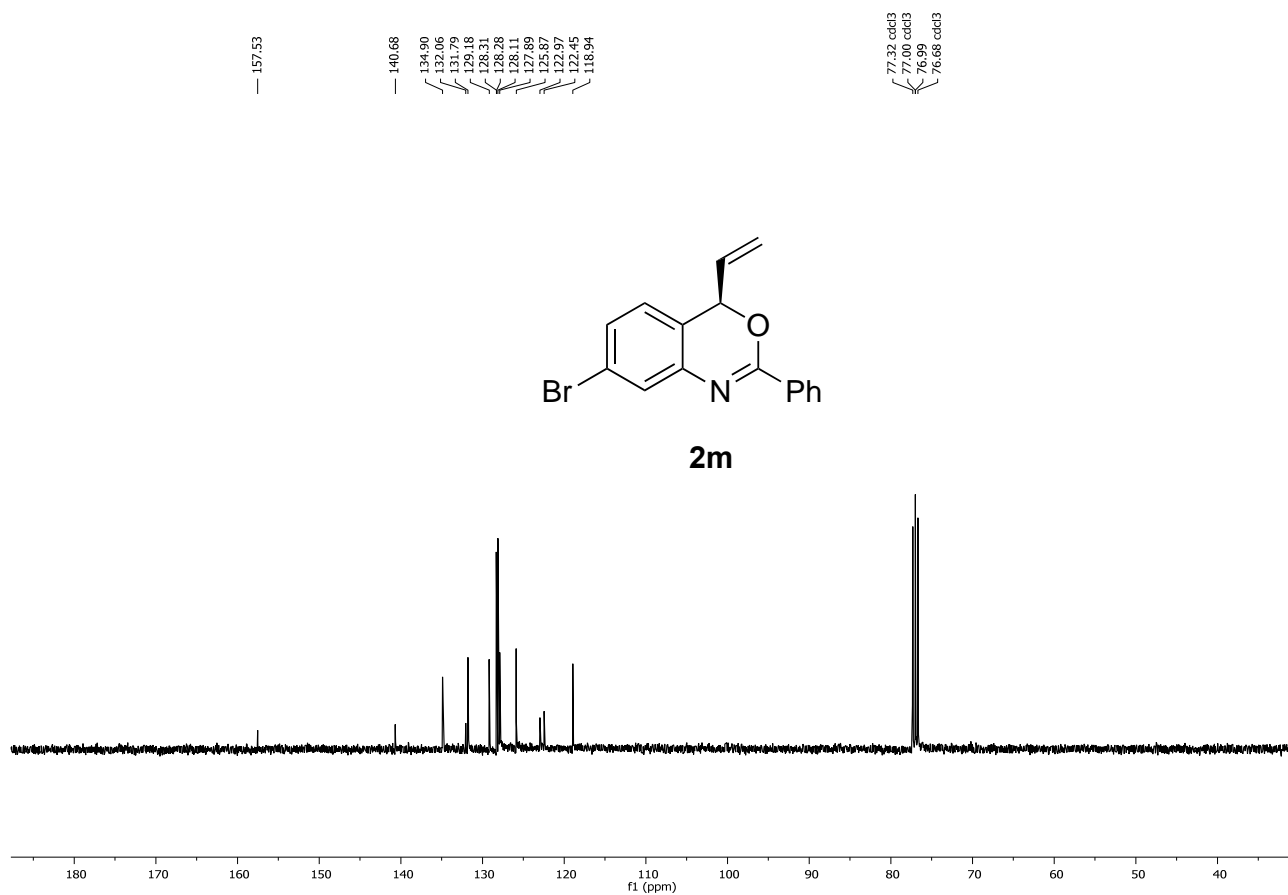

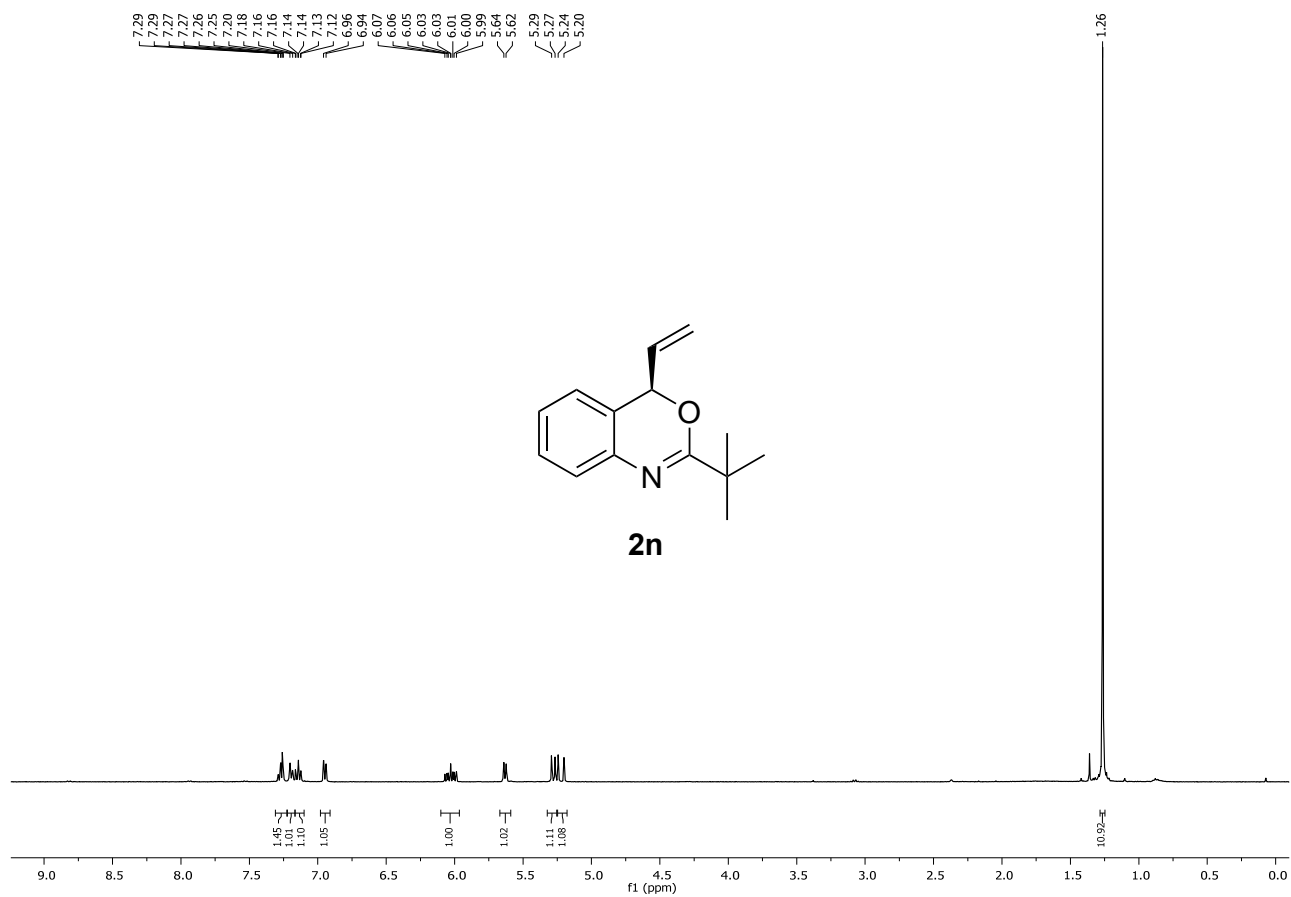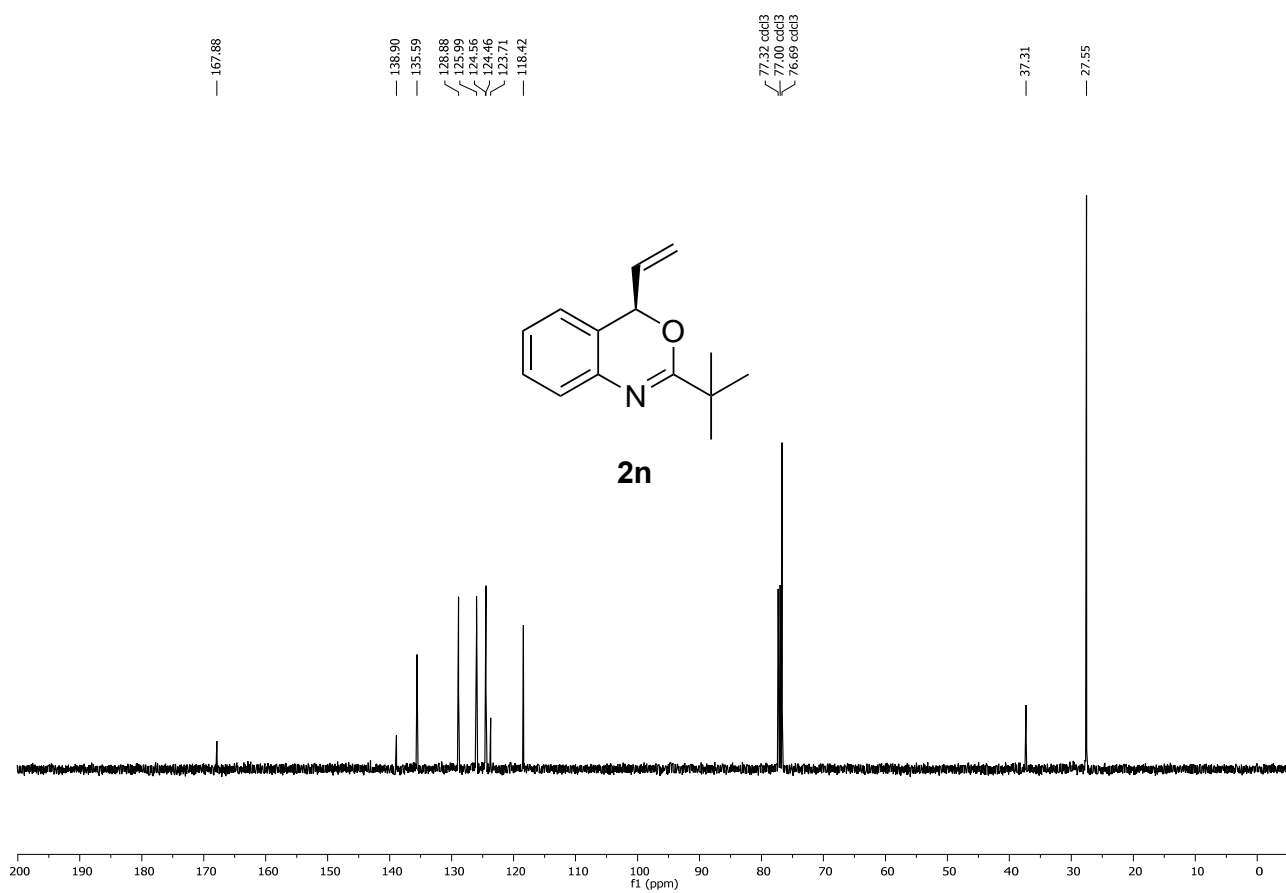

7.97, 7.96, 7.49, 7.48, 7.47, 7.46, 7.45, 7.42, 7.40, 7.39, 6.00, 5.98, 5.97, 5.96, 5.94, 5.93, 5.91, 5.40, 5.35, 5.27, 5.24, 5.15, 5.13, 5.11, 5.09, 4.24, 4.22, 4.20, 4.18, 3.81, 3.79, 3.77, 3.75

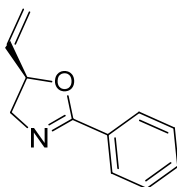

2o

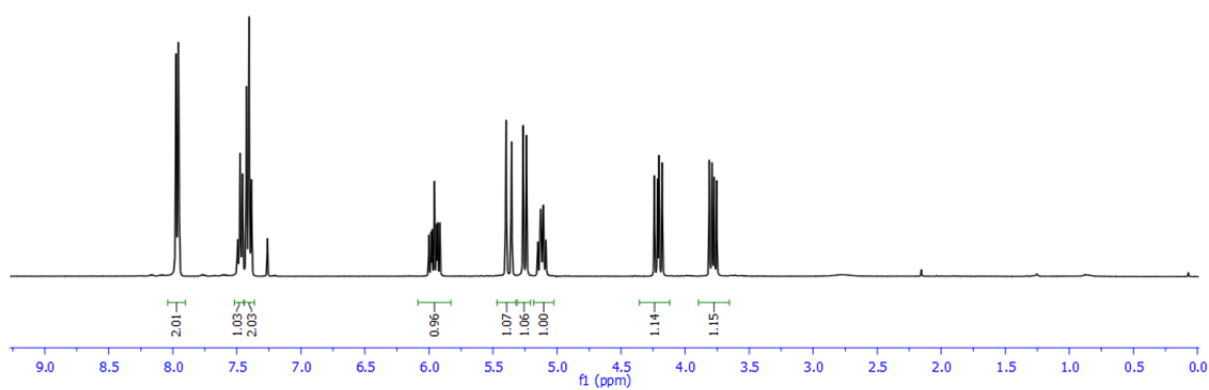

163.92, 136.31, 131.33, 128.30, 128.15, 127.58, 117.31, 80.47, 77.32, 77.00, 76.68, 60.43

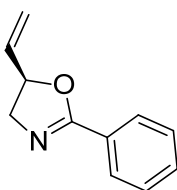

2o

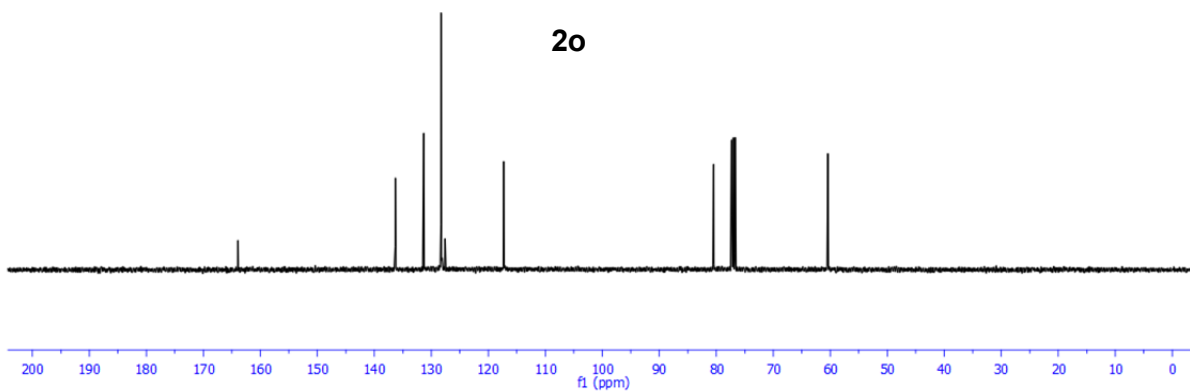

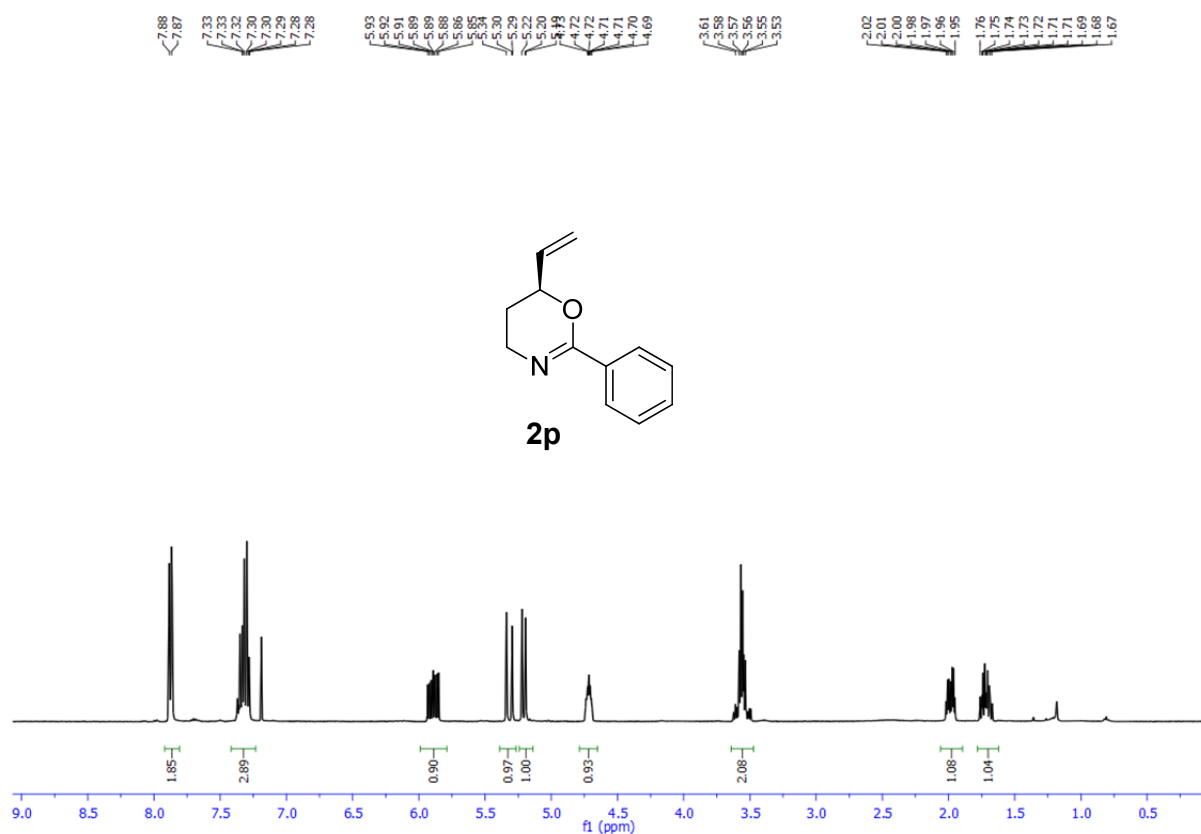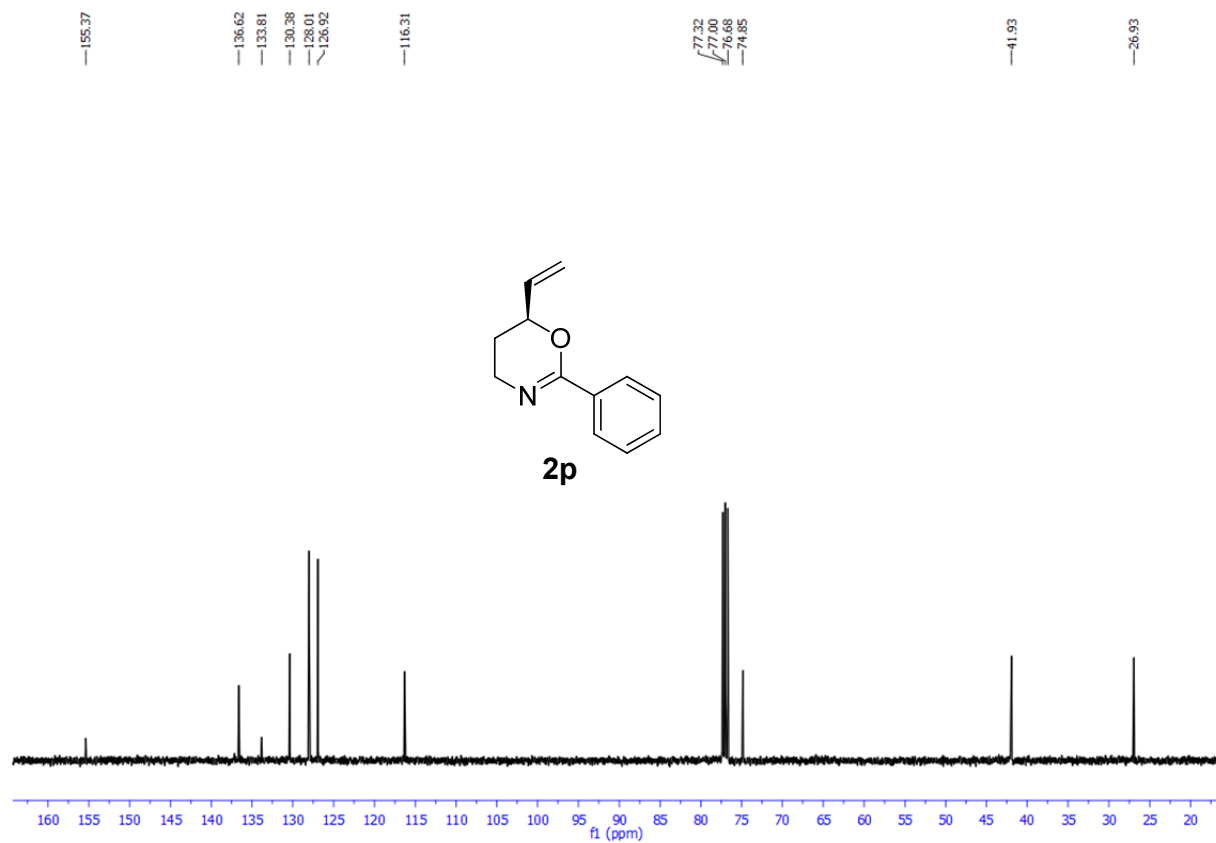

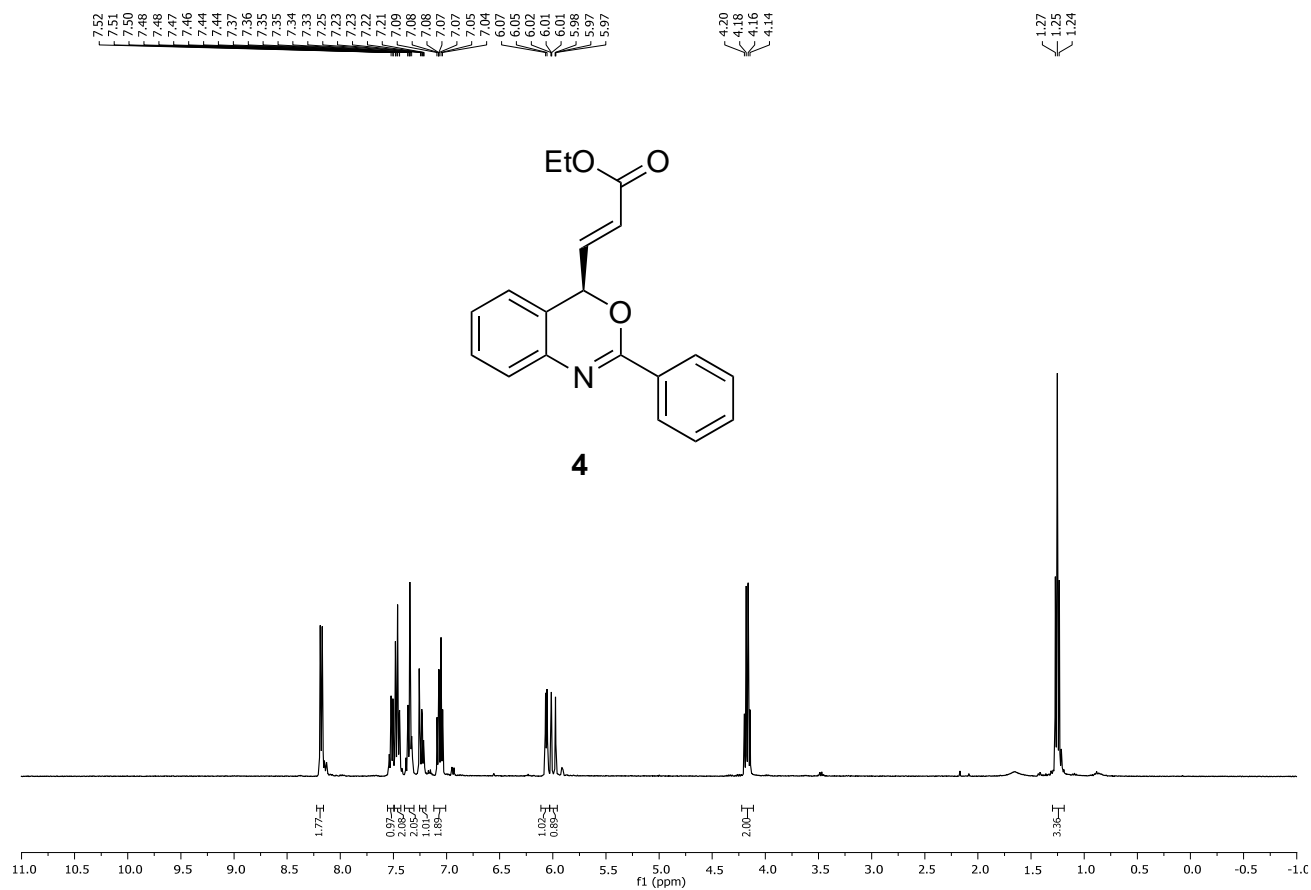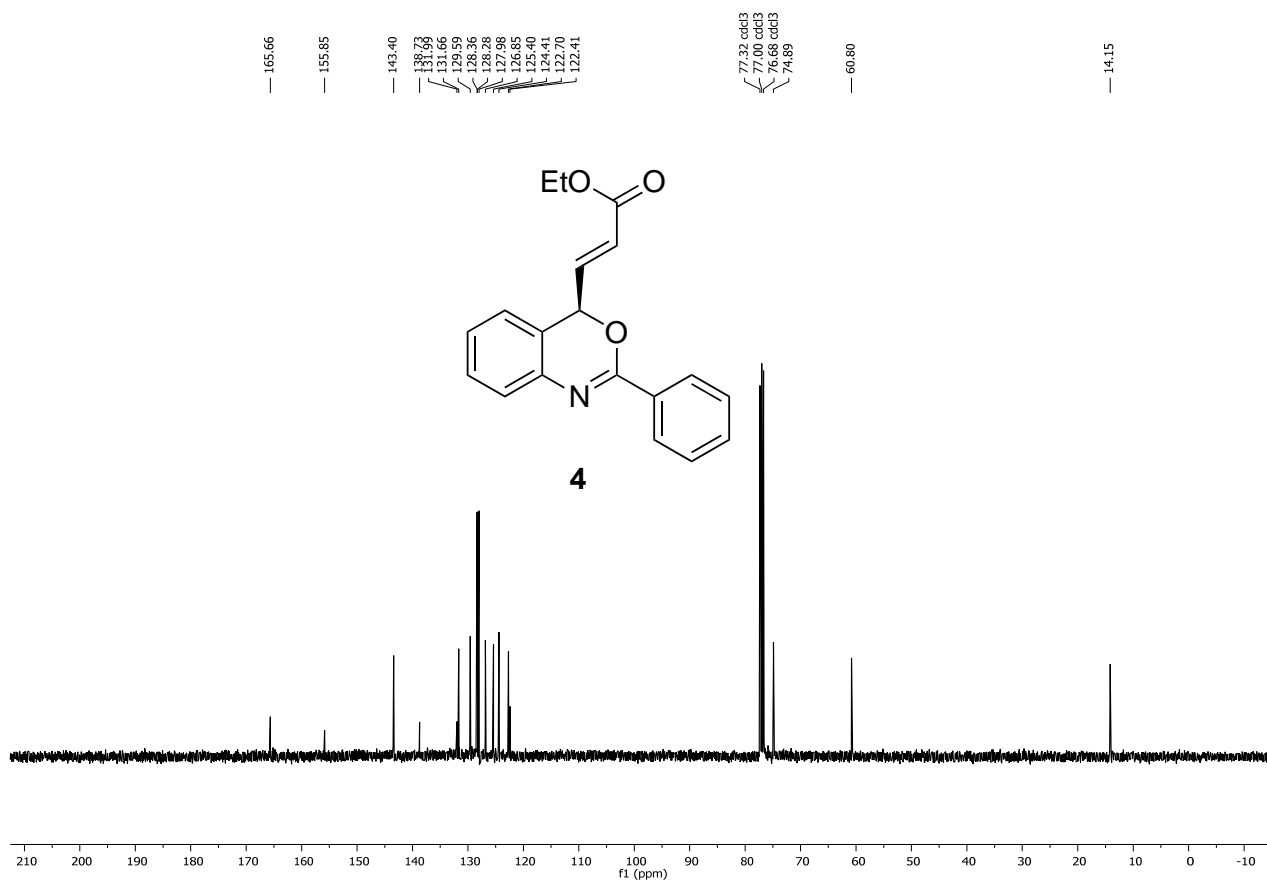

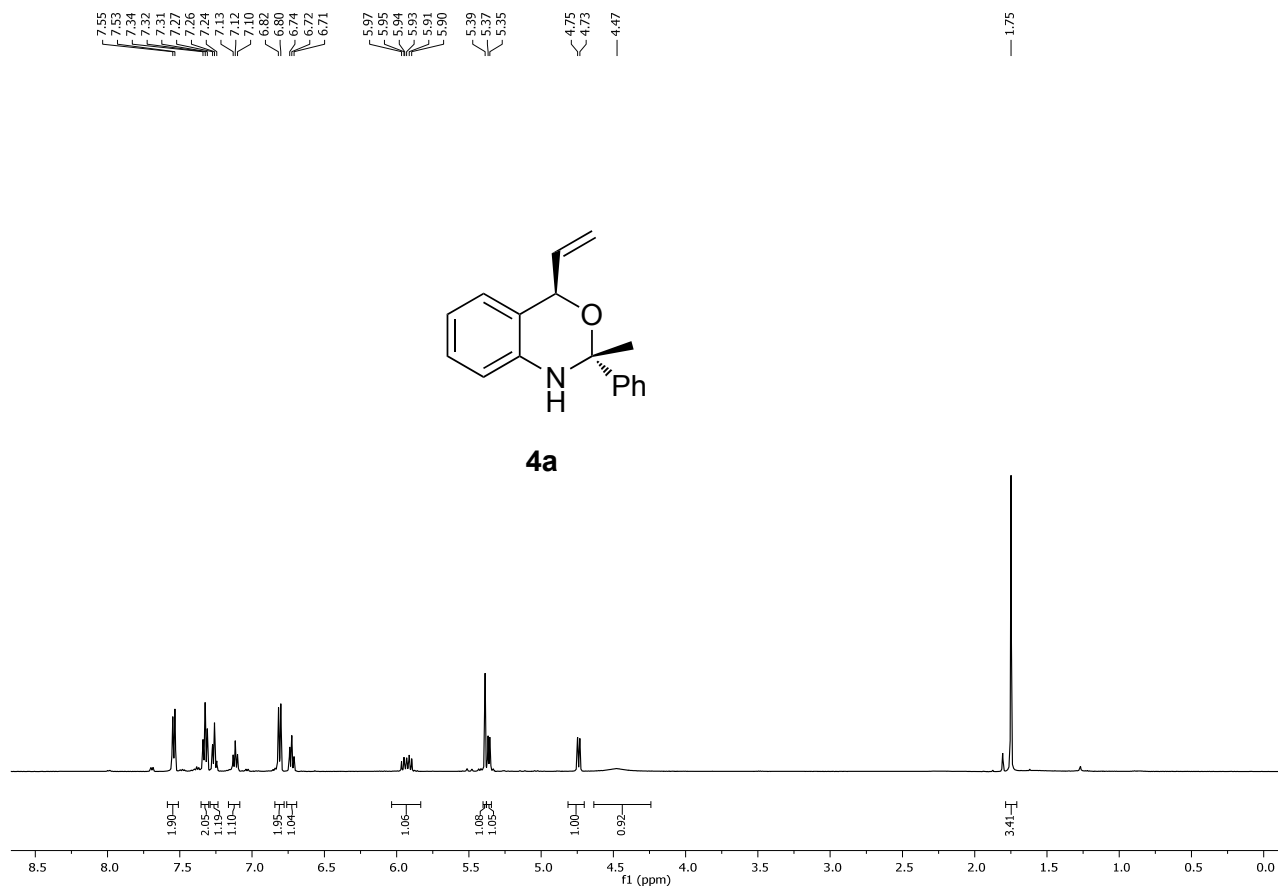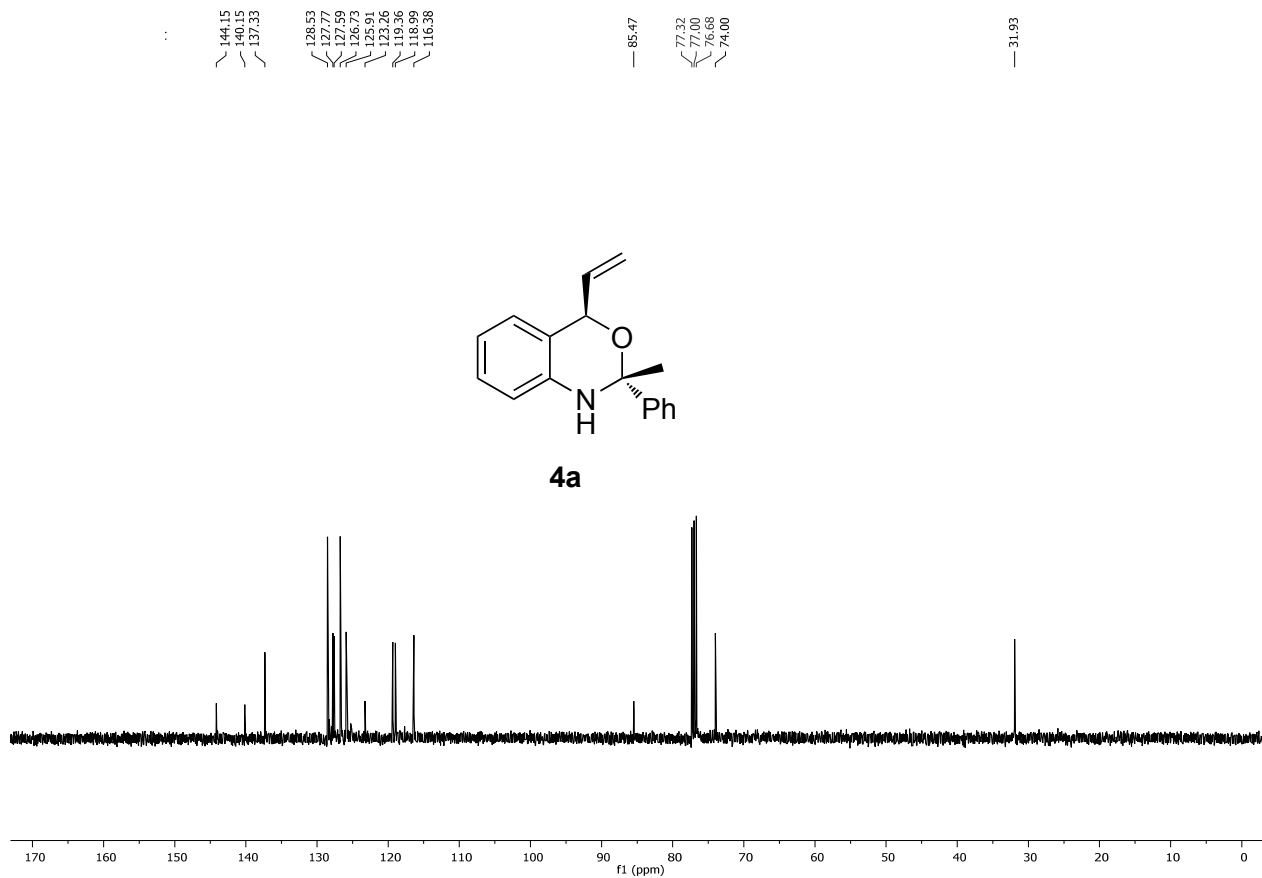

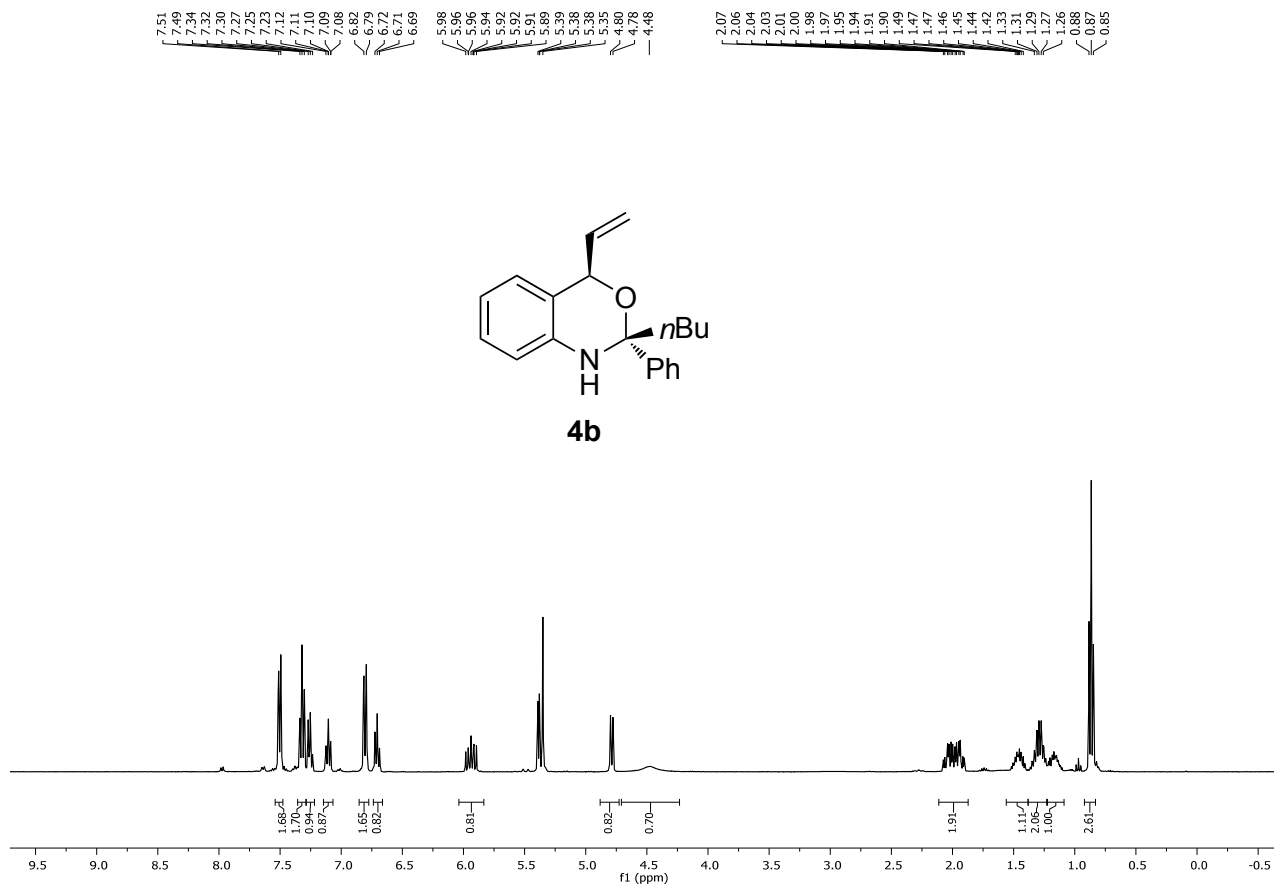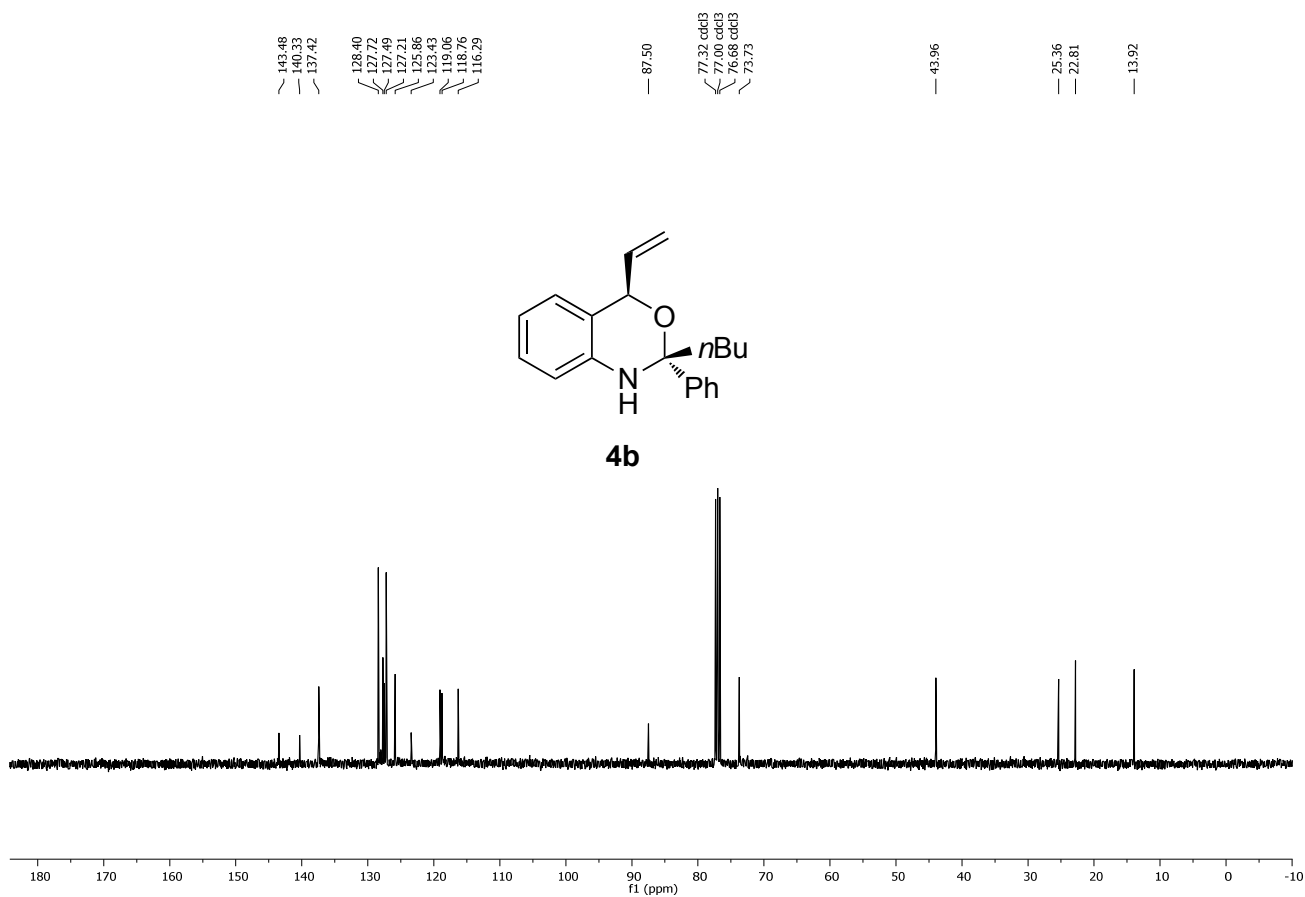

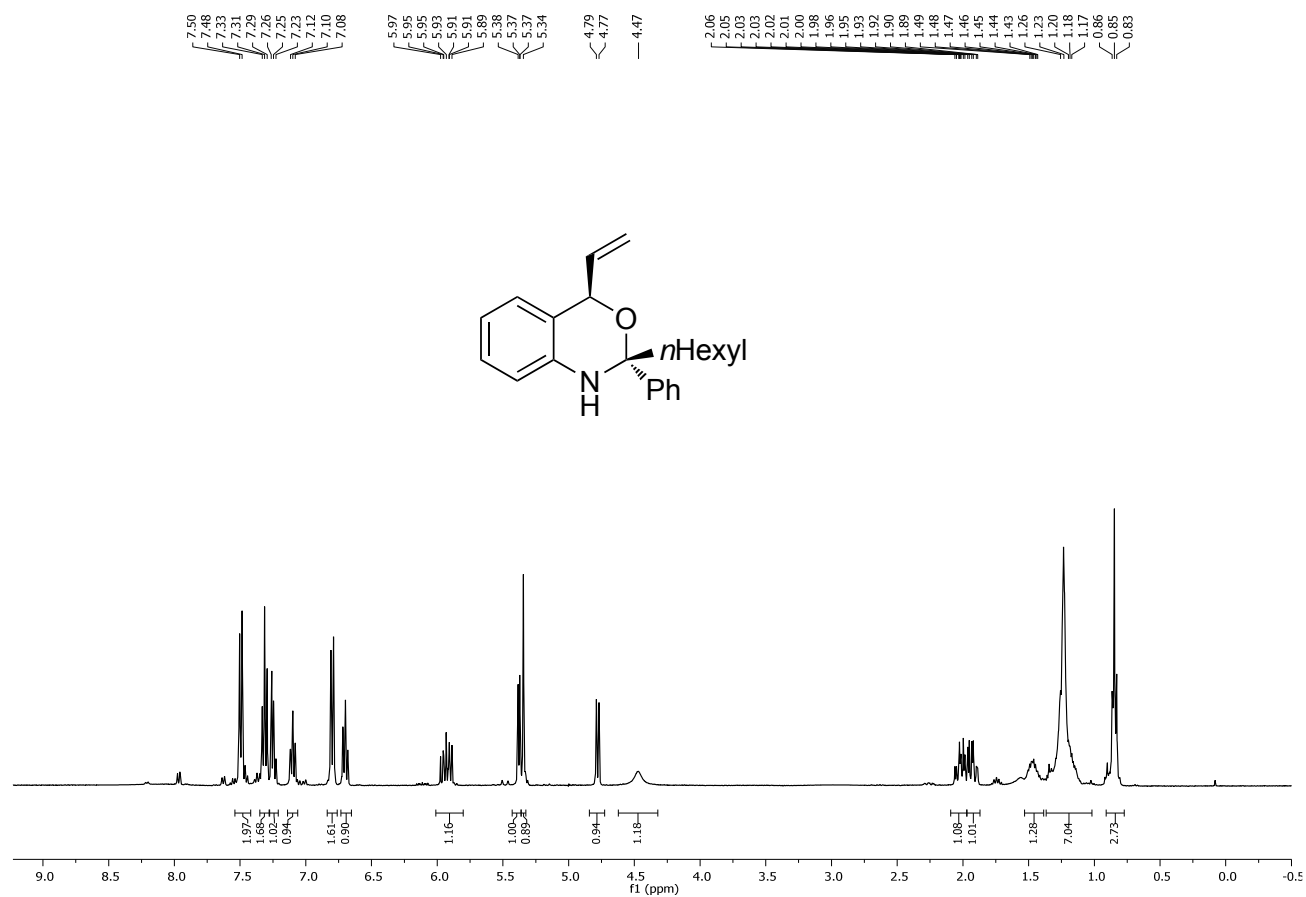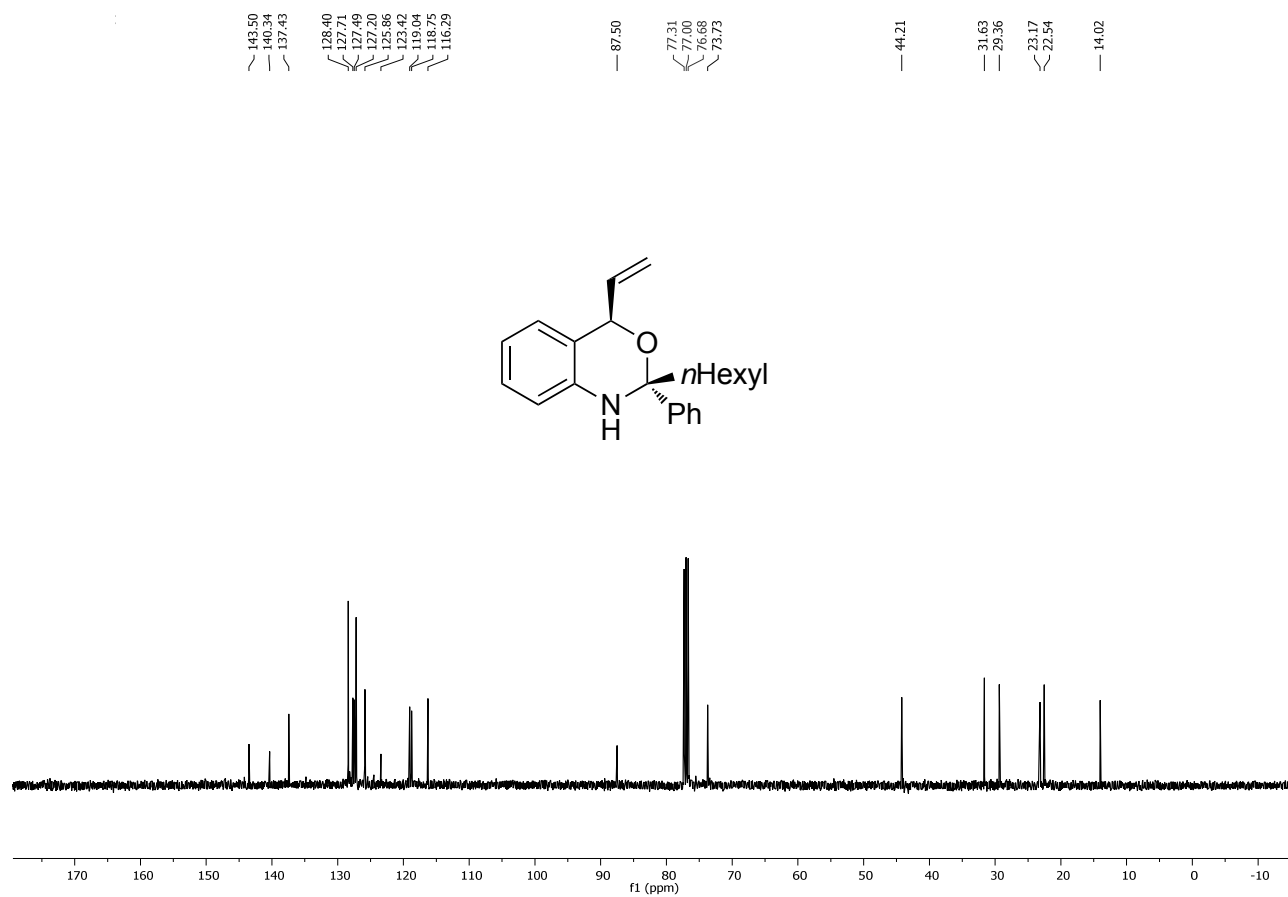

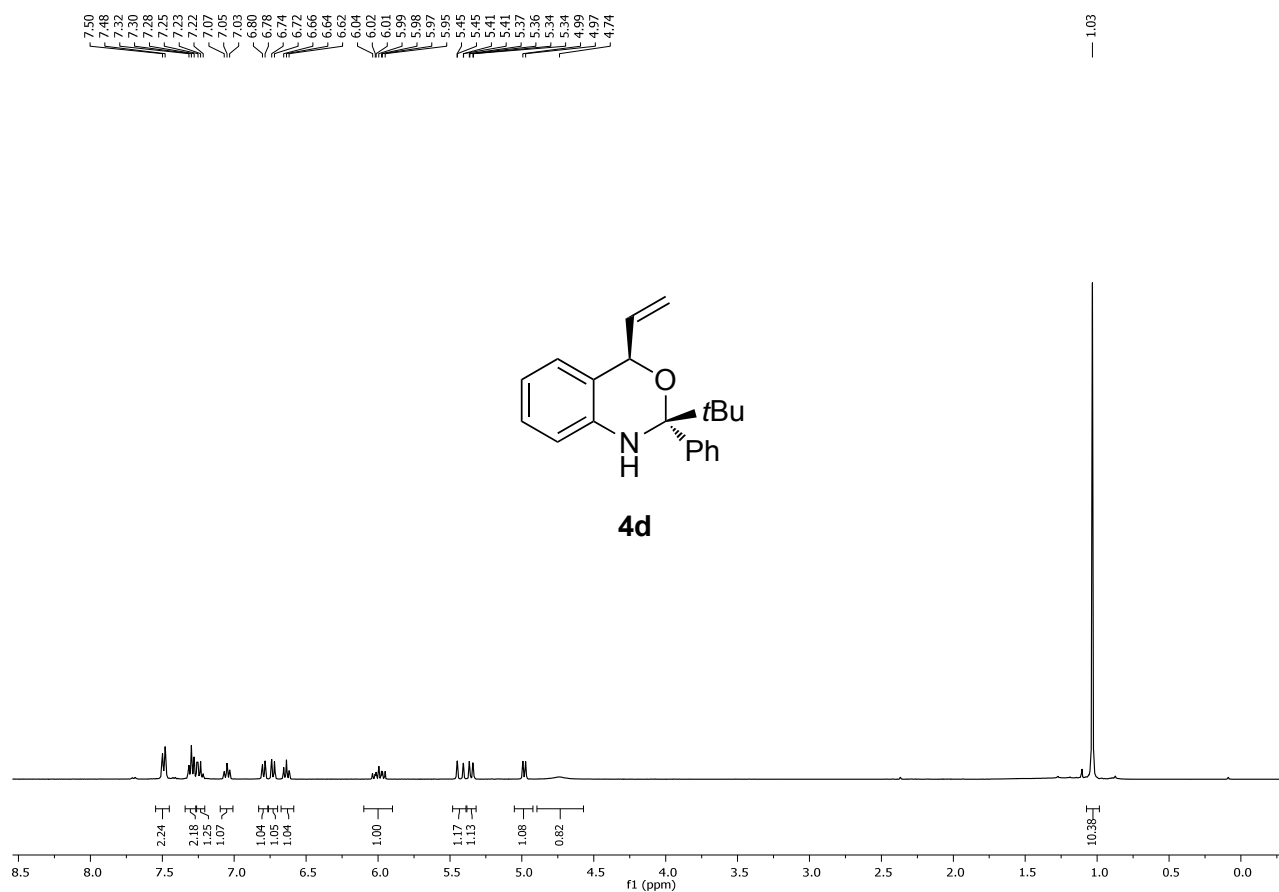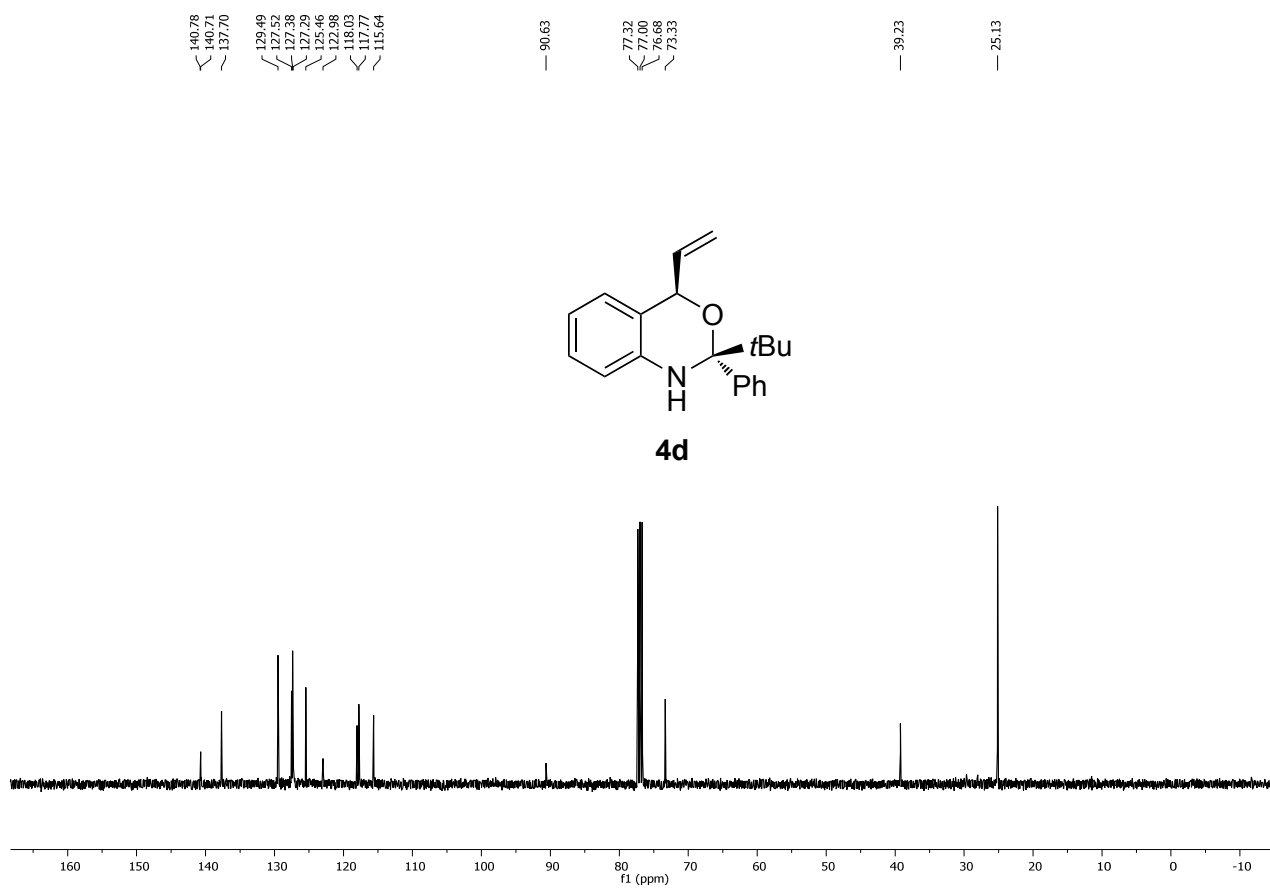

Copies of HPLC results

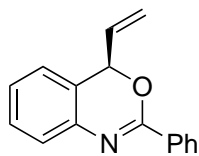

2a

mAU

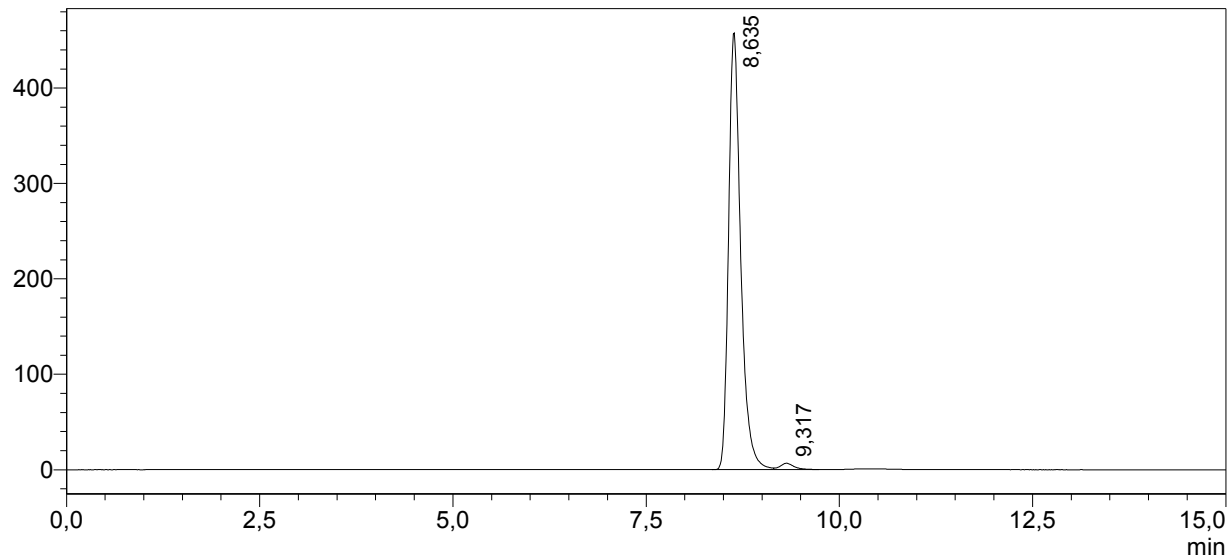

<Peak Table>

| Peak# | Ret. Time | Area    | Height | Conc. | Area%   |
|-------|-----------|---------|--------|-------|---------|
| 1     | 8,635     | 5000450 | 457494 | 0,000 | 98,399  |
| 2     | 9,317     | 81383   | 6572   | 0,000 | 1,601   |
| Total |           | 5081832 | 464066 |       | 100,000 |

mAU

Racemic mixture:

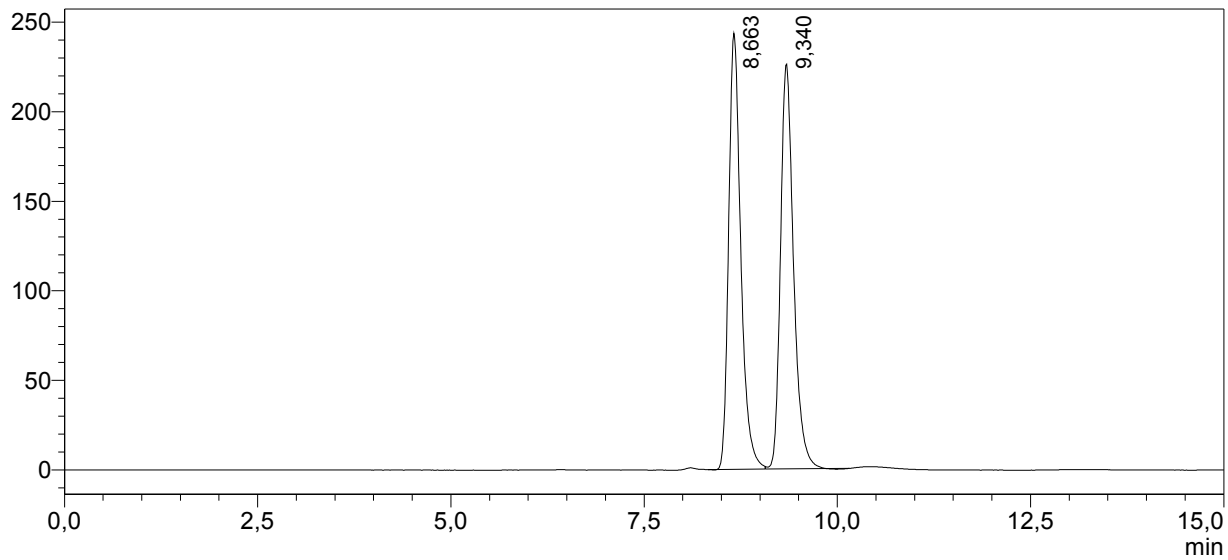

<Peak Table>

| Peak# | Ret. Time | Area    | Height | Conc. | Area%   |
|-------|-----------|---------|--------|-------|---------|
| 1     | 8,663     | 2654392 | 243343 | 0,000 | 49,991  |
| 2     | 9,340     | 2655308 | 226029 | 0,000 | 50,009  |
| Total |           | 5309701 | 469372 |       | 100,000 |

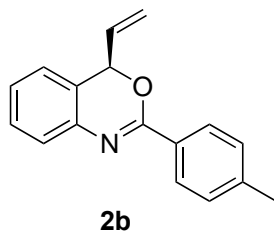

mAU

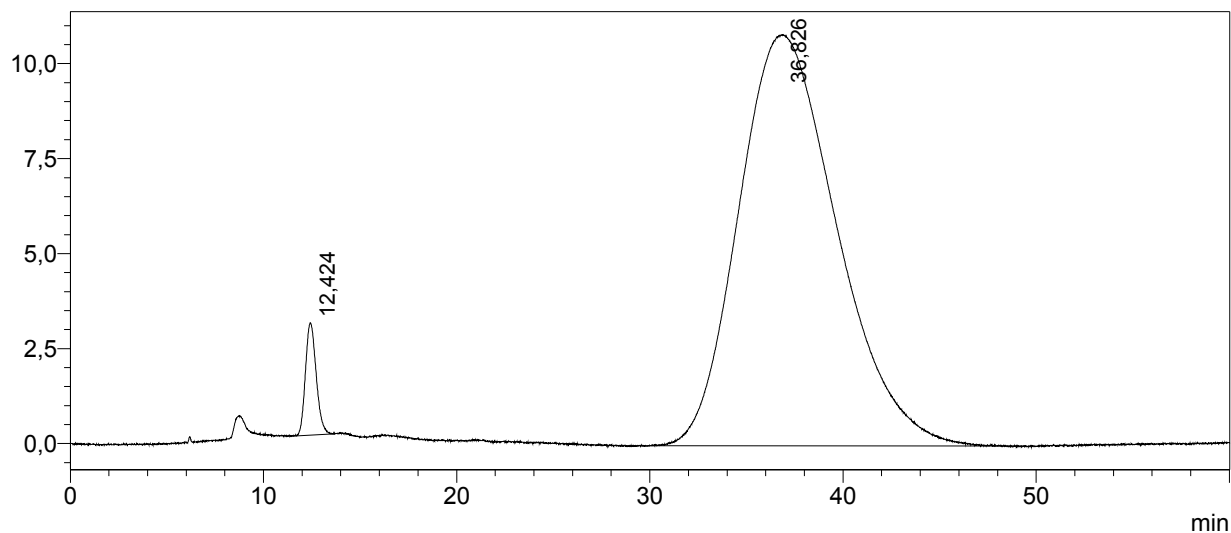

**<Peak Table>**

| Peak# | Ret. Time | Area    | Height | Conc. | Area%   |
|-------|-----------|---------|--------|-------|---------|
| 1     | 12,424    | 114792  | 2956   | 0,000 | 2,918   |
| 2     | 36,826    | 3819775 | 10822  | 0,000 | 97,082  |
| Total |           | 3934567 | 13779  |       | 100,000 |

mAU

Racemic mixture:

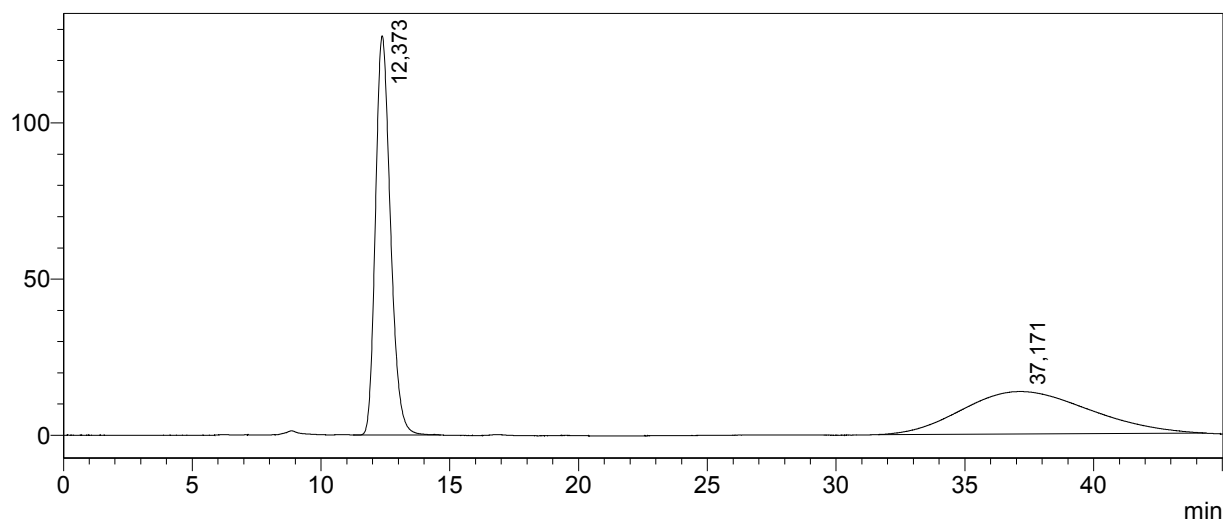

**<Peak Table>**

| Peak# | Ret. Time | Area    | Height | Conc. | Area%   |
|-------|-----------|---------|--------|-------|---------|
| 1     | 12,373    | 5183488 | 127892 | 0,000 | 52,600  |
| 2     | 37,171    | 4671073 | 13579  | 0,000 | 47,400  |
| Total |           | 9854560 | 141471 |       | 100,000 |

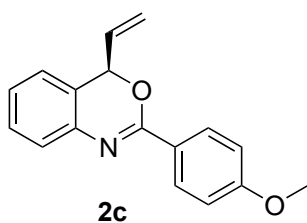

mAU

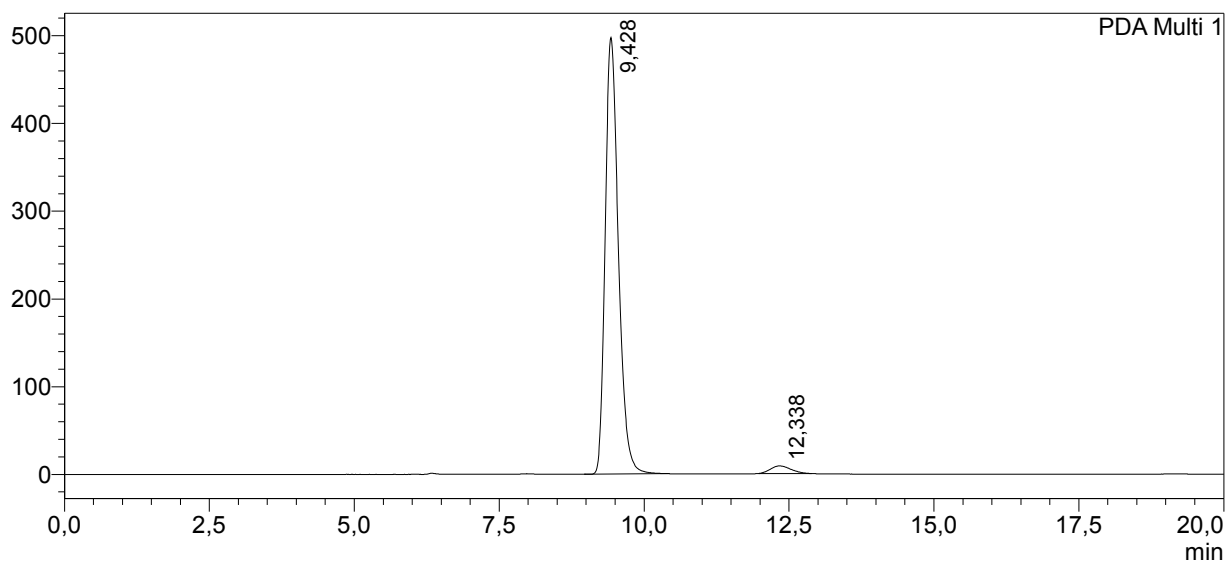

### <Peak Table>

| Peak# | Ret. Time | Area    | Height | Conc. | Area%   |
|-------|-----------|---------|--------|-------|---------|
| 1     | 9,428     | 7893858 | 497459 | 0,000 | 97,384  |
| 2     | 12,338    | 212040  | 8665   | 0,000 | 2,616   |
| Total |           | 8105898 | 506124 |       | 100,000 |

mAU

Racemic mixture:

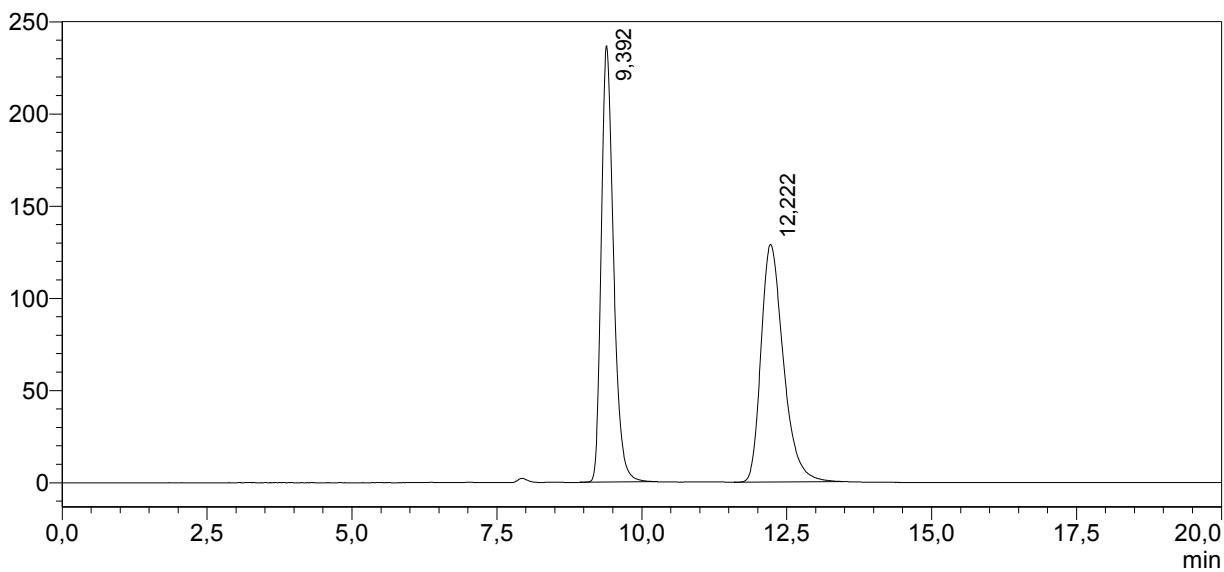

### <Peak Table>

| Peak# | Ret. Time | Area    | Height | Conc. | Area%   |
|-------|-----------|---------|--------|-------|---------|
| 1     | 9,392     | 3496560 | 236474 | 0,000 | 50,335  |
| 2     | 12,222    | 3449968 | 128820 | 0,000 | 49,665  |
| Total |           | 6946528 | 365295 |       | 100,000 |

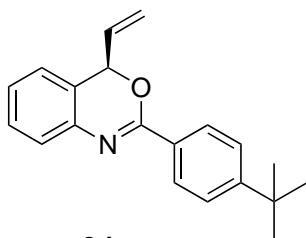

mAU

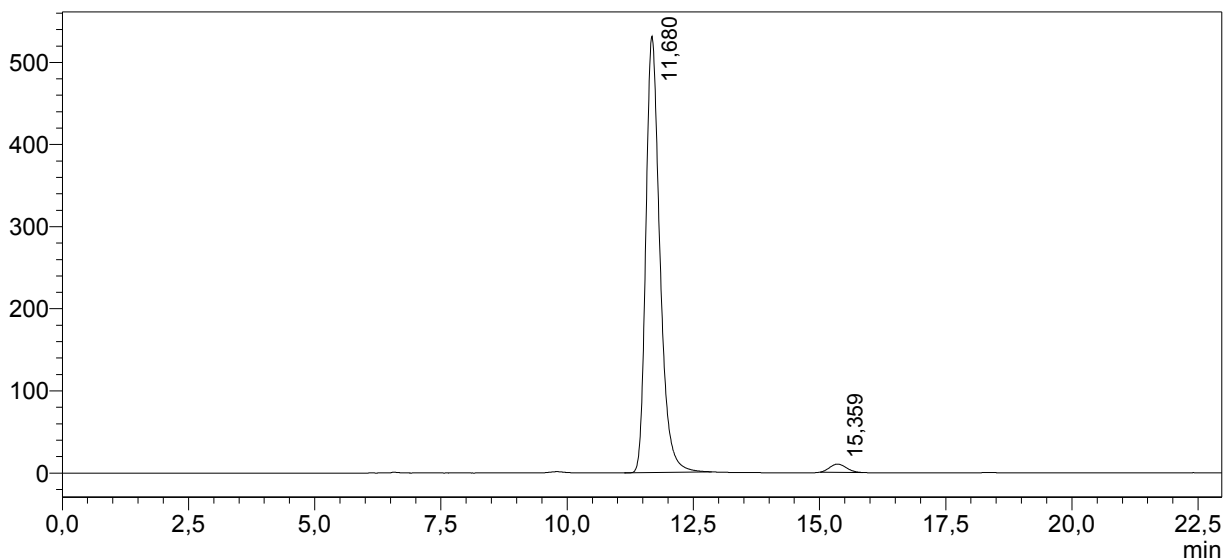

**<Peak Table>**

| Peak# | Ret. Time | Area     | Height | Conc. | Area%   |
|-------|-----------|----------|--------|-------|---------|
| 1     | 11,680    | 10248972 | 531158 | 0,000 | 97,864  |
| 2     | 15,359    | 223685   | 9927   | 0,000 | 2,136   |
| Total |           | 10472657 | 541085 |       | 100,000 |

mAU

Racemic mixture:

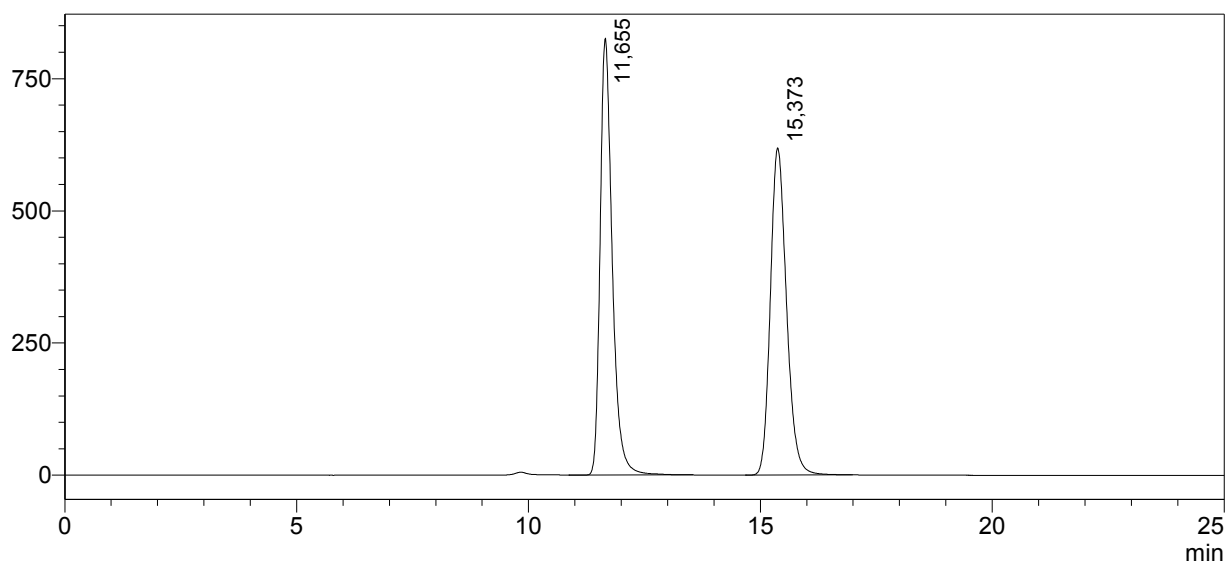

**<Peak Table>**

| Peak# | Ret. Time | Area     | Height  | Conc. | Area%   |
|-------|-----------|----------|---------|-------|---------|
| 1     | 11,655    | 14975247 | 825387  | 0,000 | 50,003  |
| 2     | 15,373    | 14973385 | 618688  | 0,000 | 49,997  |
| Total |           | 29948631 | 1444075 |       | 100,000 |

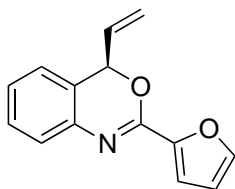

mAU

**2e**

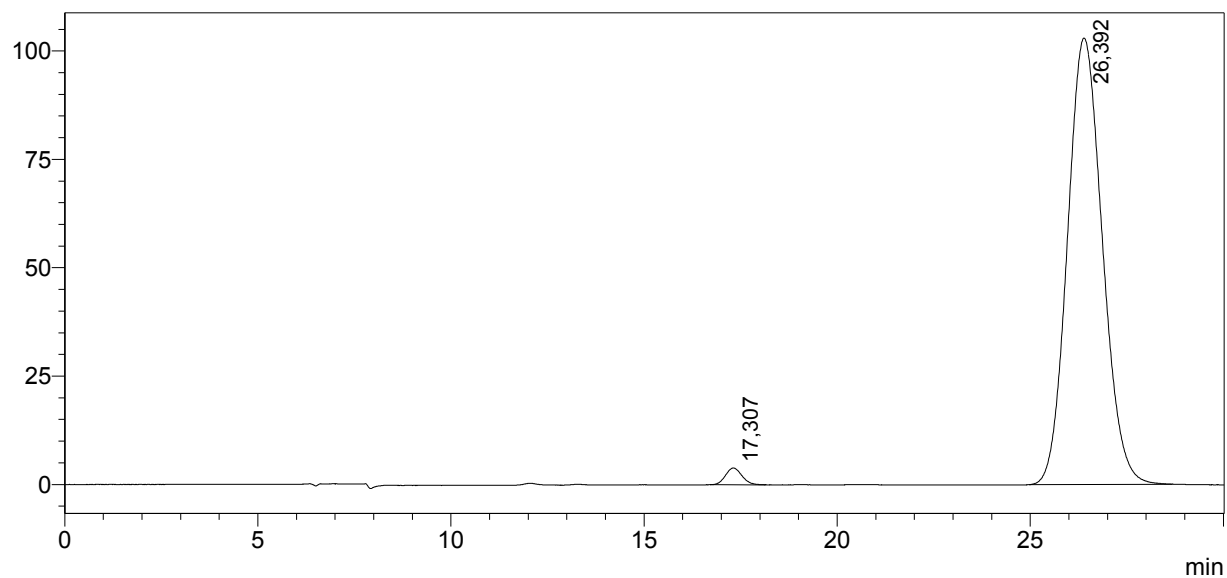

**<Peak Table>**

| Peak# | Ret. Time | Area    | Height | Conc. | Area%   |
|-------|-----------|---------|--------|-------|---------|
| 1     | 17,307    | 114187  | 3864   | 0,000 | 1,736   |
| 2     | 26,392    | 6463193 | 102988 | 0,000 | 98,264  |
| Total |           | 6577379 | 106852 |       | 100,000 |

mAU

Racemic mixture:

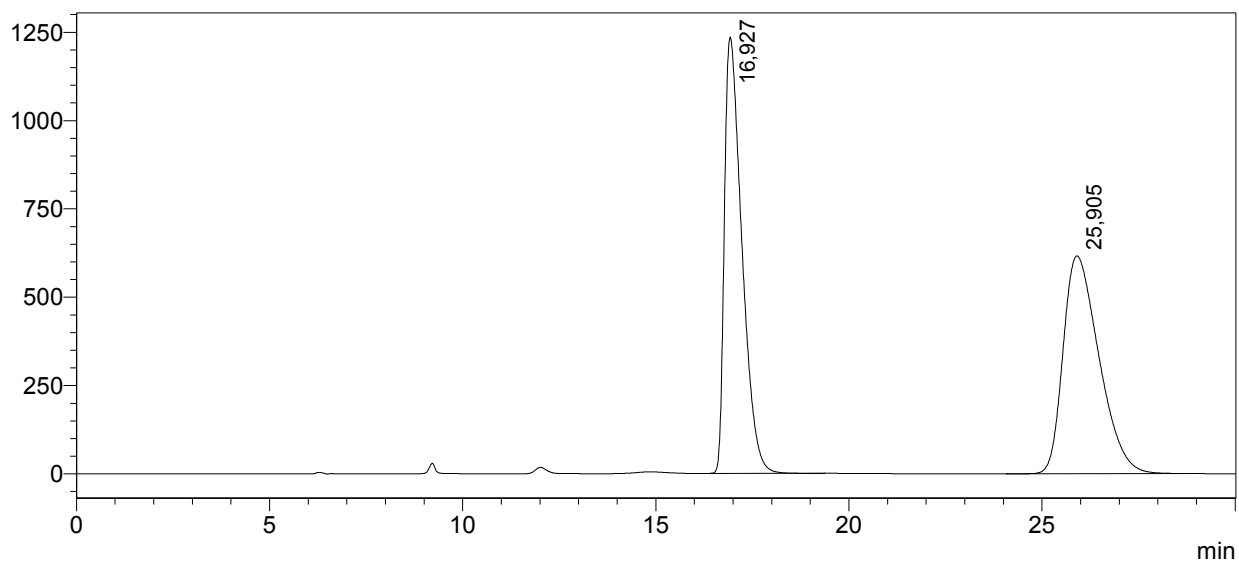

**<Peak Table>**

| Peak# | Ret. Time | Area     | Height  | Conc. | Area%   |
|-------|-----------|----------|---------|-------|---------|
| 1     | 16,927    | 38877482 | 1234613 | 0,000 | 49,411  |
| 2     | 25,905    | 39803930 | 616442  | 0,000 | 50,589  |
| Total |           | 78681412 | 1851055 |       | 100,000 |

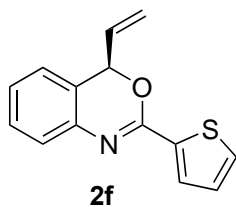

mAU

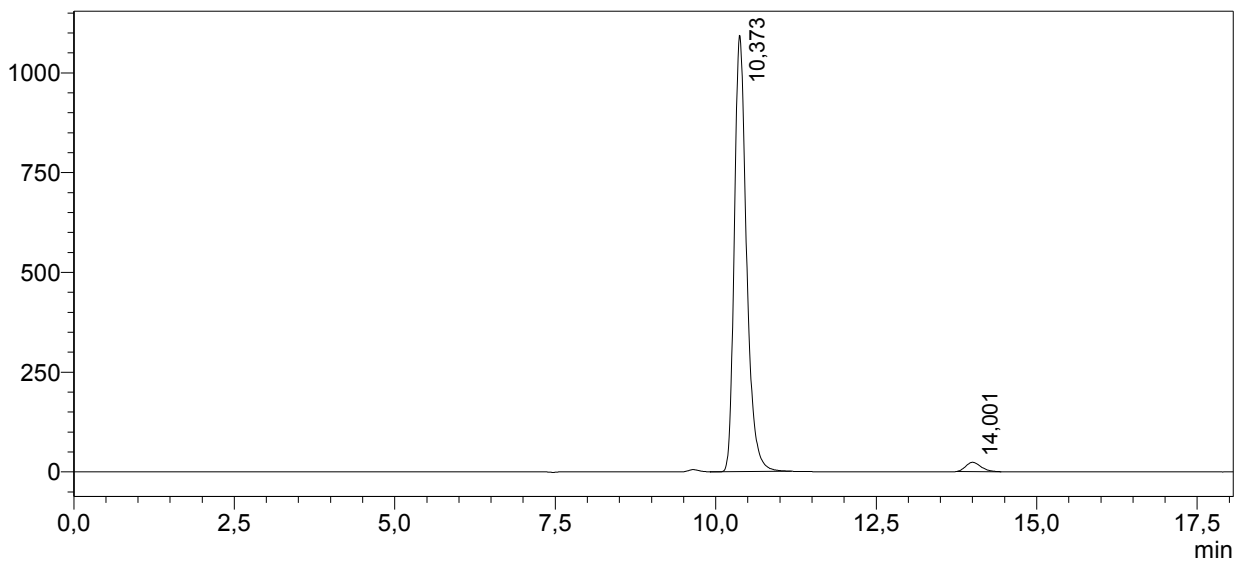

### <Peak Table>

| Peak# | Ret. Time | Area     | Height  | Conc. | Area%   |
|-------|-----------|----------|---------|-------|---------|
| 1     | 10,373    | 14438329 | 1092586 | 0,000 | 97,427  |
| 2     | 14,001    | 381240   | 23141   | 0,000 | 2,573   |
| Total |           | 14819569 | 1115727 |       | 100,000 |

mAU

Racemic mixture:

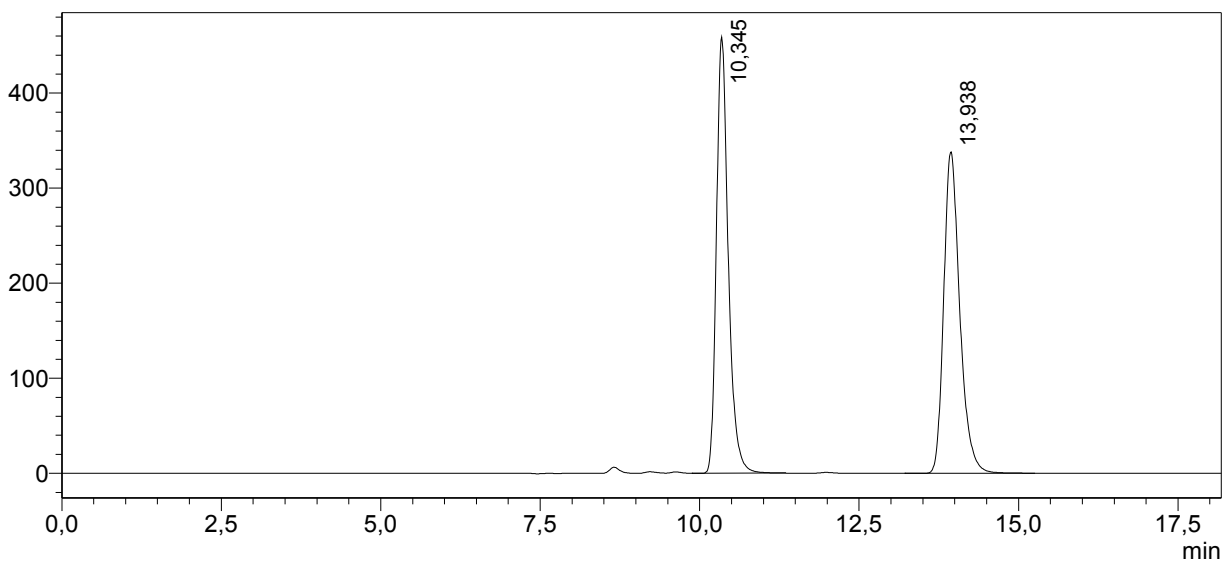

### <Peak Table>

| Peak# | Ret. Time | Area     | Height | Conc. | Area%   |
|-------|-----------|----------|--------|-------|---------|
| 1     | 10,345    | 5921901  | 458883 | 0,000 | 49,975  |
| 2     | 13,938    | 5927932  | 338186 | 0,000 | 50,025  |
| Total |           | 11849833 | 797069 |       | 100,000 |

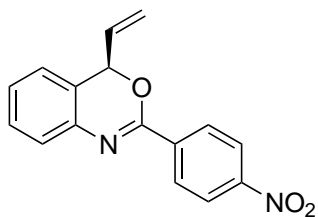

mAU

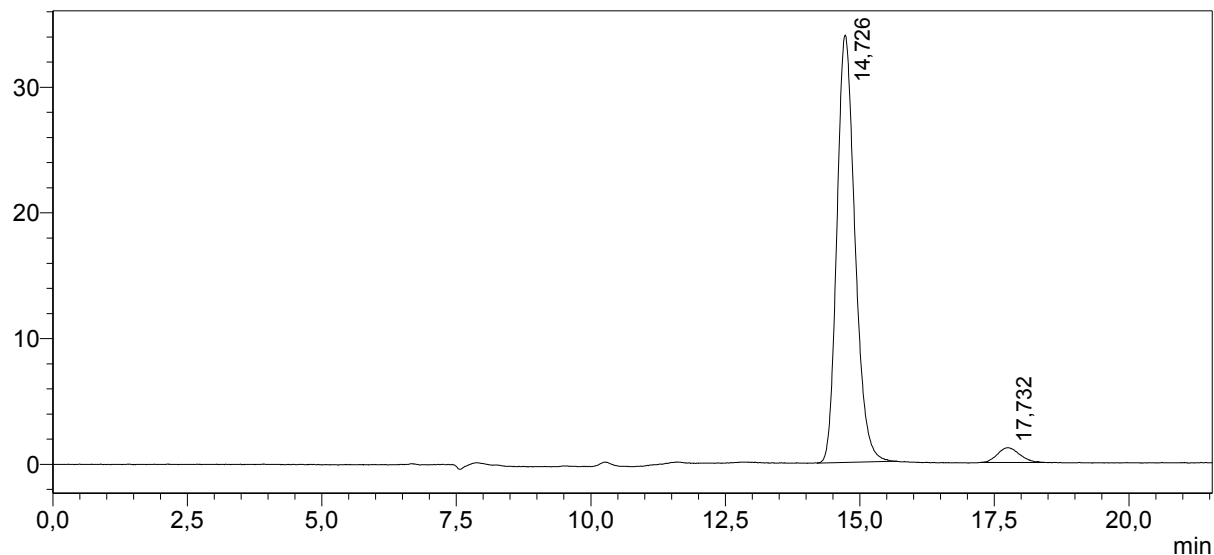

<Peak Table>

| Peak# | Ret. Time | Area   | Height | Conc. | Area%   |
|-------|-----------|--------|--------|-------|---------|
| 1     | 14,726    | 793930 | 33998  | 0,000 | 95,952  |
| 2     | 17,732    | 33498  | 1179   | 0,000 | 4,048   |
| Total |           | 827428 | 35177  |       | 100,000 |

mAU

Racemic mixture:

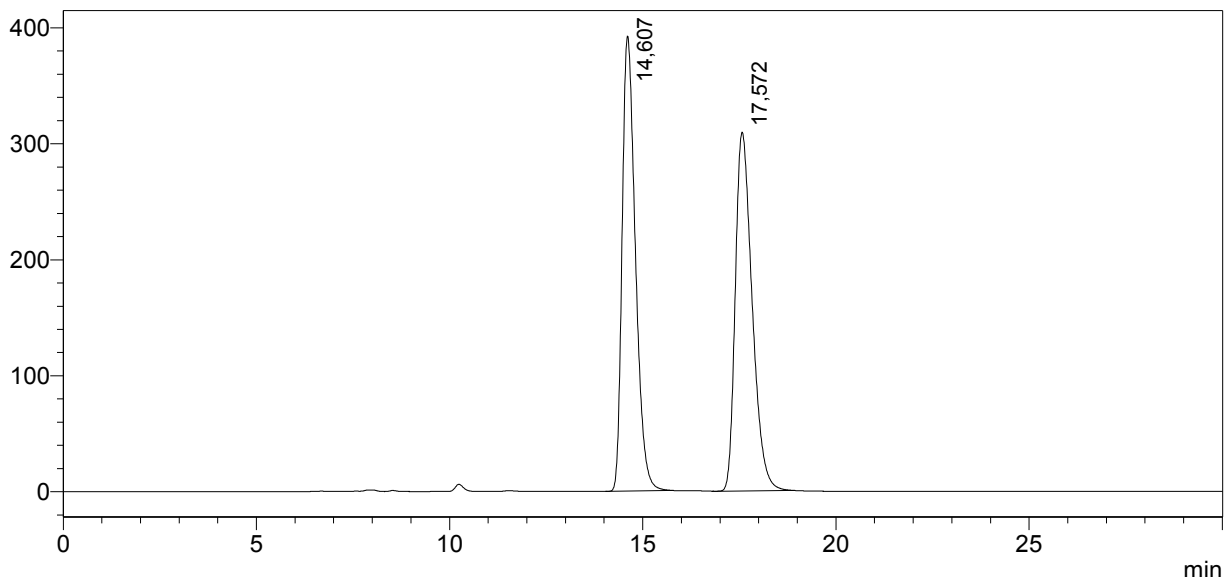

<Peak Table>

| Peak# | Ret. Time | Area     | Height | Conc. | Area%   |
|-------|-----------|----------|--------|-------|---------|
| 1     | 14,607    | 9371156  | 392257 | 0,000 | 50,012  |
| 2     | 17,572    | 9366490  | 309231 | 0,000 | 49,988  |
| Total |           | 18737646 | 701489 |       | 100,000 |

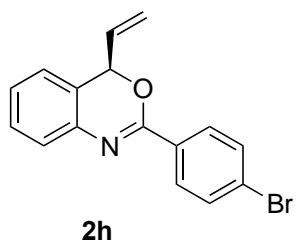

mAU

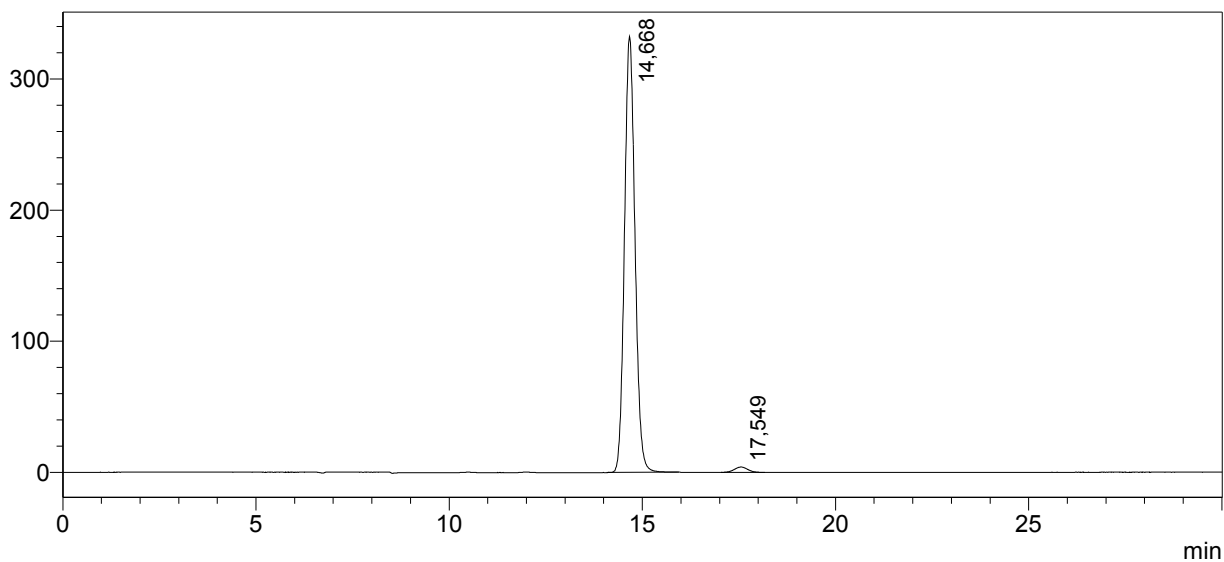

**<Peak Table>**

| Peak# | Ret. Time | Area    | Height | Conc. | Area%   |
|-------|-----------|---------|--------|-------|---------|
| 1     | 14,668    | 6279017 | 332542 | 0,000 | 98,475  |
| 2     | 17,549    | 97211   | 4075   | 0,000 | 1,525   |
| Total |           | 6376228 | 336617 |       | 100,000 |

mAU

Racemic mixture:

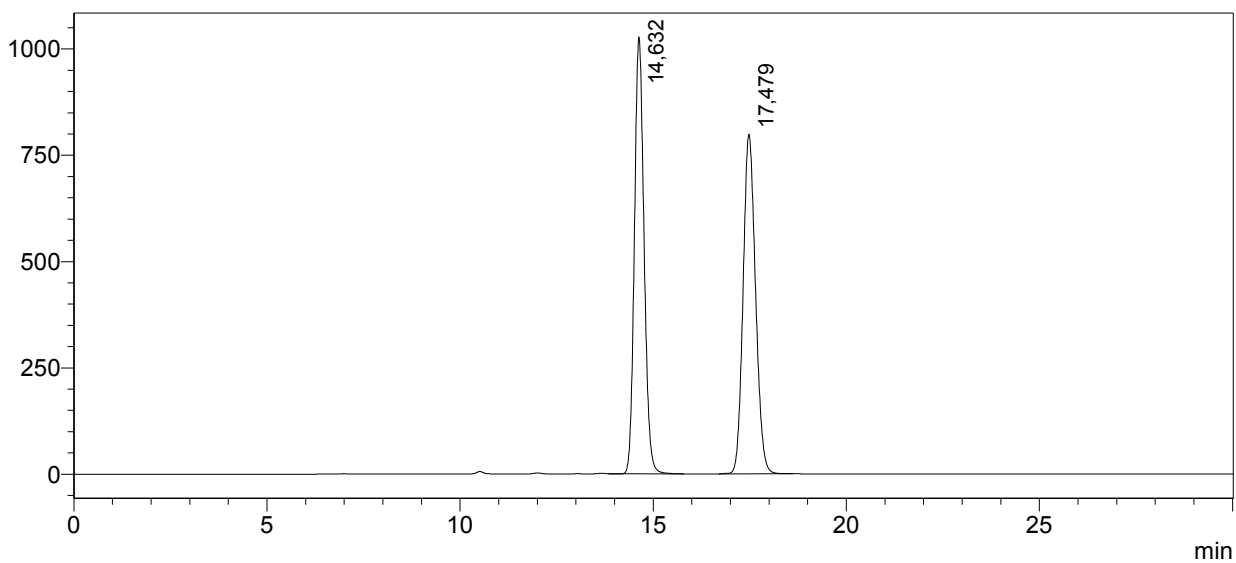

**<Peak Table>**

| Peak# | Ret. Time | Area     | Height  | Conc. | Area%   |
|-------|-----------|----------|---------|-------|---------|
| 1     | 14,632    | 17814047 | 1026175 | 0,000 | 49,877  |
| 2     | 17,479    | 17901784 | 798480  | 0,000 | 50,123  |
| Total |           | 35715831 | 1824655 |       | 100,000 |

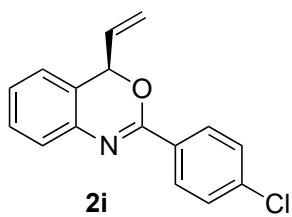

mAU

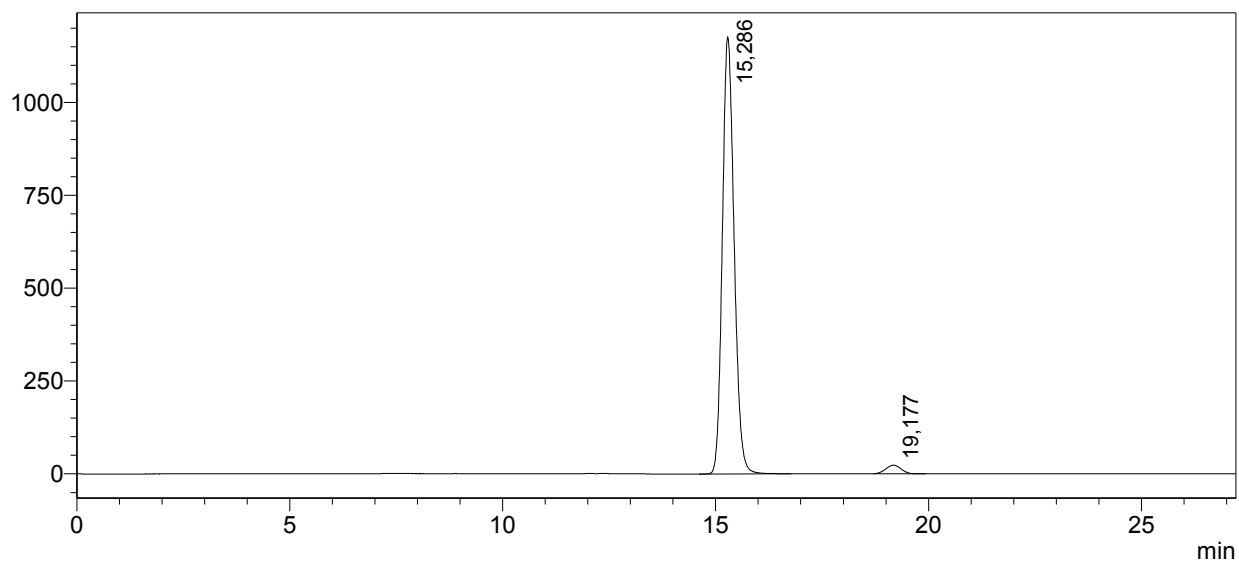

**<Peak Table>**

| Peak# | Ret. Time | Area     | Height  | Area%   |
|-------|-----------|----------|---------|---------|
| 1     | 15,286    | 22568719 | 1175212 | 97,524  |
| 2     | 19,177    | 573086   | 23159   | 2,476   |
| Total |           | 23141805 | 1198371 | 100,000 |

mAU

Racemic mixture:

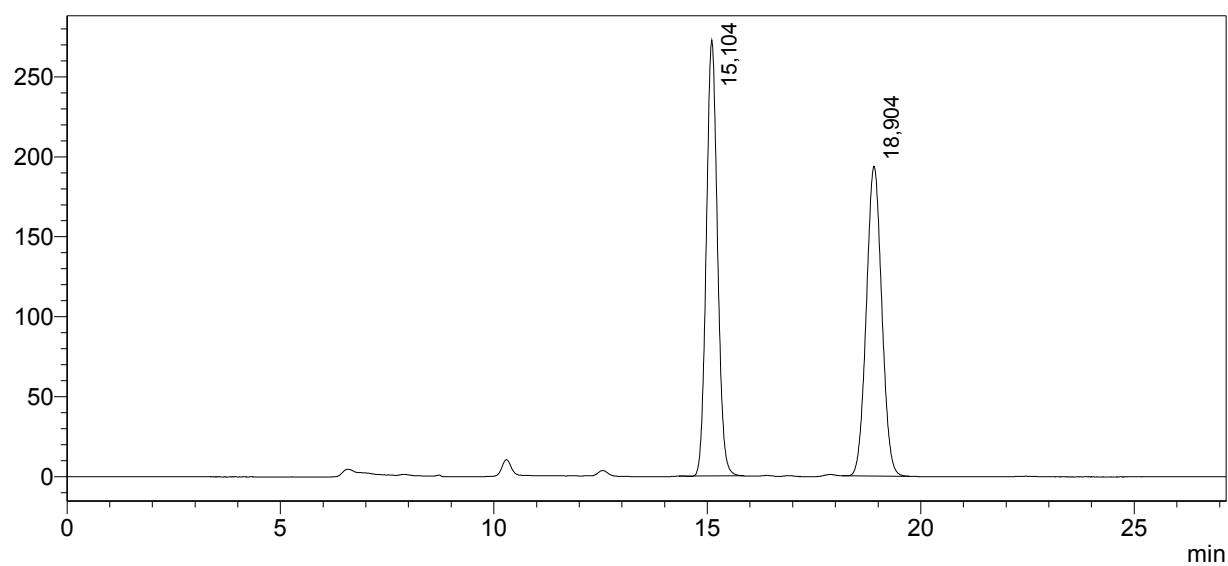

**<Peak Table>**

| Peak# | Ret. Time | Area    | Height | Conc. | Area%   |
|-------|-----------|---------|--------|-------|---------|
| 1     | 15,104    | 4950049 | 272552 | 0,000 | 50,431  |
| 2     | 18,904    | 4865498 | 193843 | 0,000 | 49,569  |
| Total |           | 9815547 | 466394 |       | 100,000 |

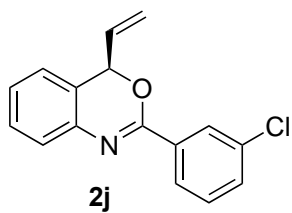

mAU

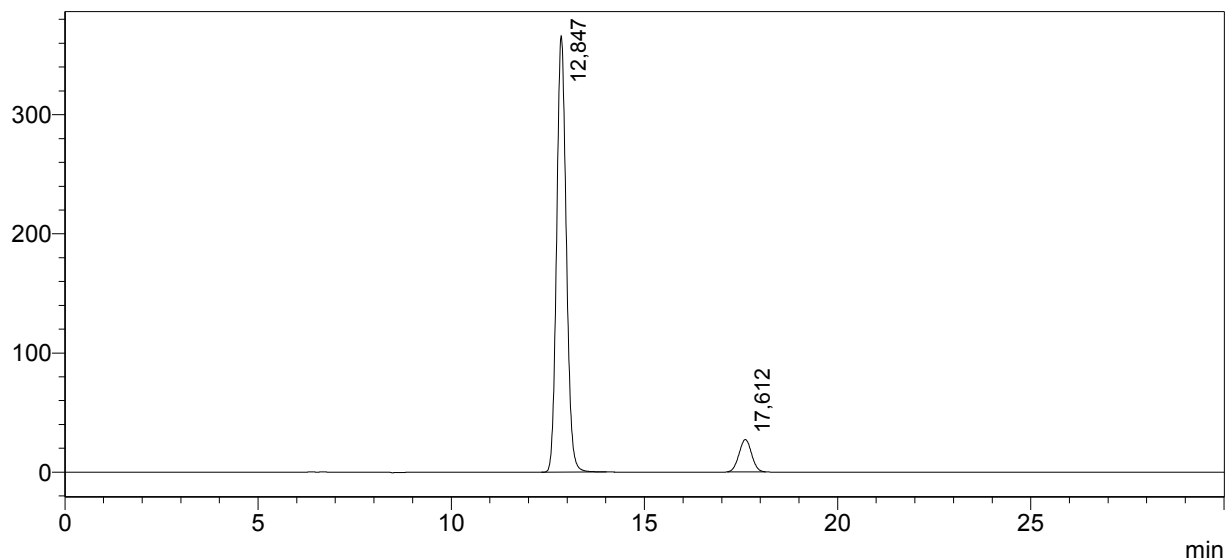

### <Peak Table>

| Peak# | Ret. Time | Area    | Height | Conc. | Area%   |
|-------|-----------|---------|--------|-------|---------|
| 1     | 12,847    | 6346912 | 366096 | 0,000 | 91,226  |
| 2     | 17,612    | 610430  | 27139  | 0,000 | 8,774   |
| Total |           | 6957343 | 393235 |       | 100,000 |

mAU

Racemic mixture:

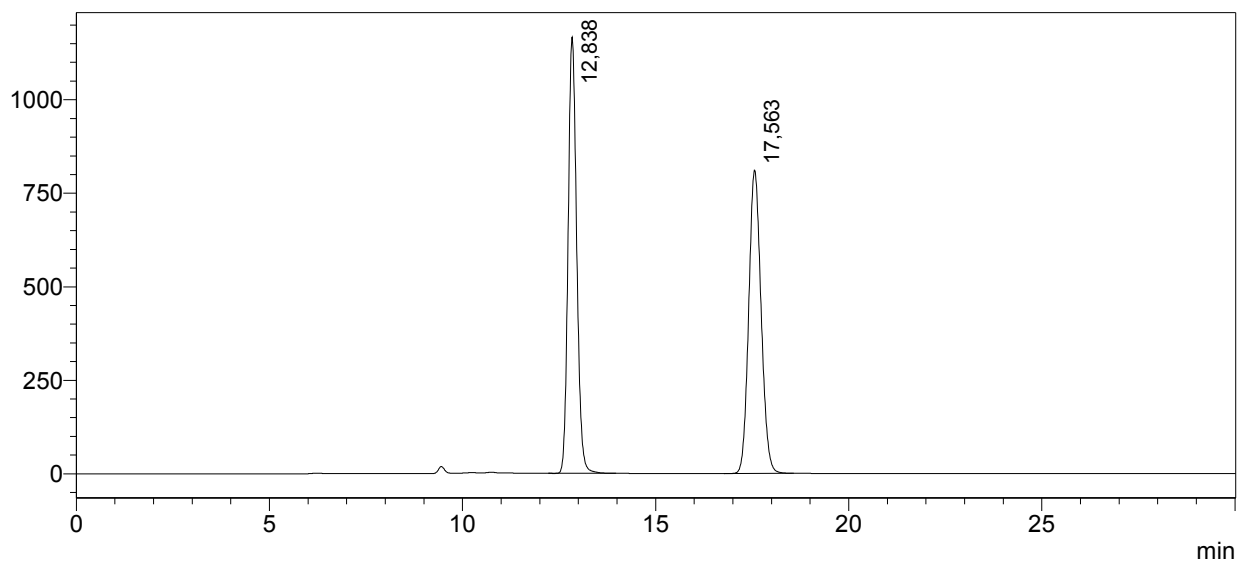

### <Peak Table>

| Peak# | Ret. Time | Area     | Height  | Conc. | Area%   |
|-------|-----------|----------|---------|-------|---------|
| 1     | 12,838    | 17957826 | 1166602 | 0,000 | 49,884  |
| 2     | 17,563    | 18041292 | 810857  | 0,000 | 50,116  |
| Total |           | 35999118 | 1977459 |       | 100,000 |

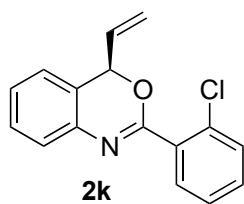

mAU

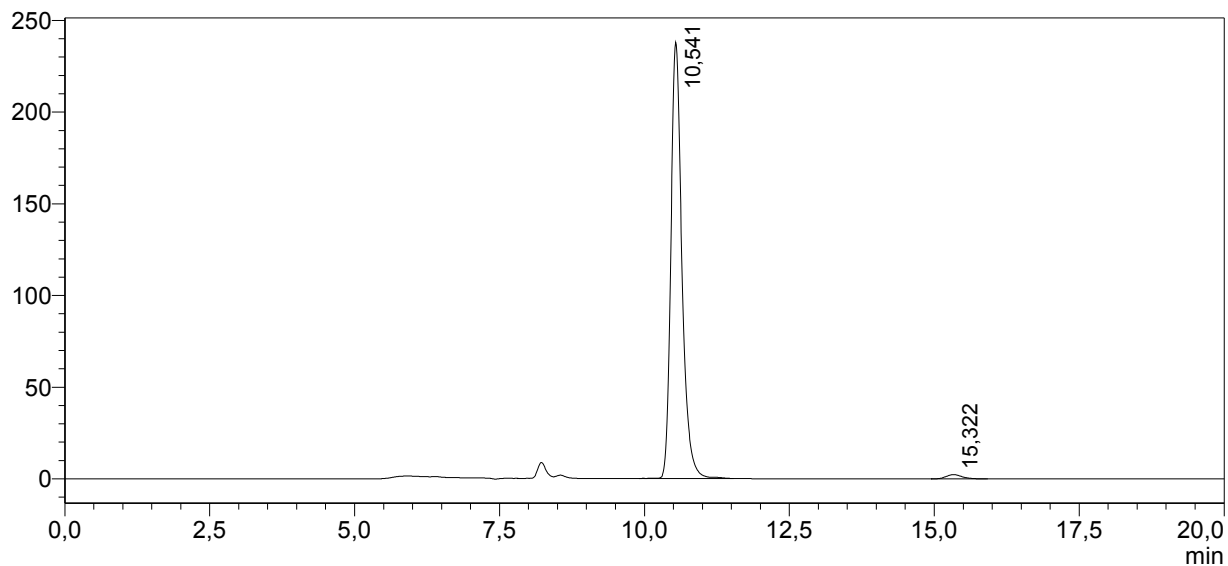

**<Peak Table>**

| Peak# | Ret. Time | Area    | Height | Conc. | Area%   |
|-------|-----------|---------|--------|-------|---------|
| 1     | 10,541    | 3140940 | 237782 | 0,000 | 98,585  |
| 2     | 15,322    | 45097   | 2353   | 0,000 | 1,415   |
| Total |           | 3186037 | 240135 |       | 100,000 |

mAU

Racemic mixture:

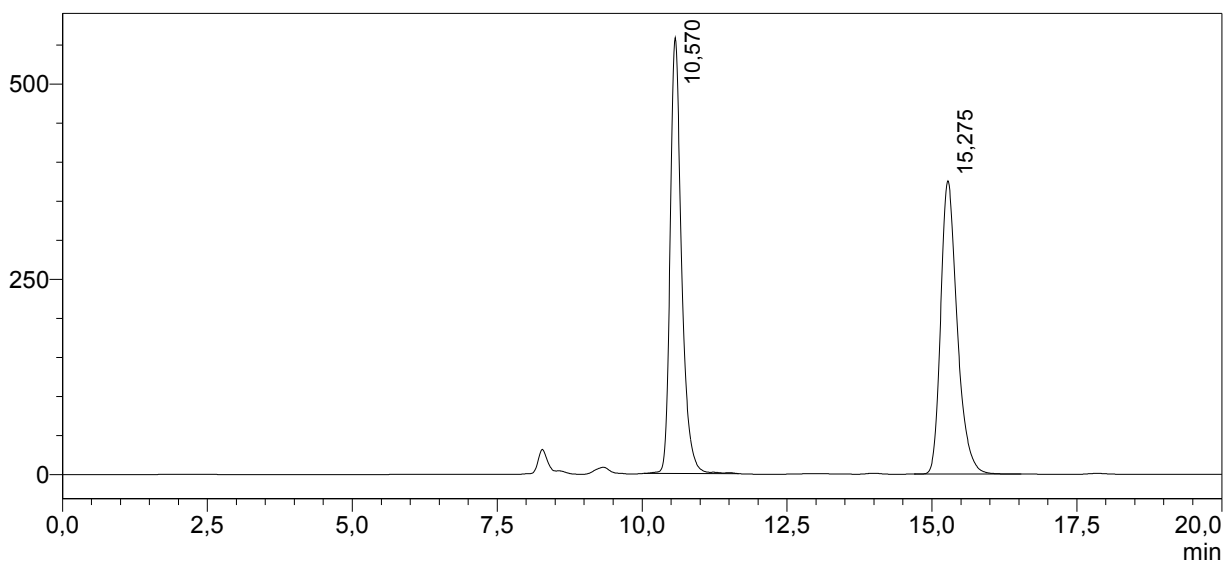

**<Peak Table>**

| Peak# | Ret. Time | Area     | Height | Conc. | Area%   |
|-------|-----------|----------|--------|-------|---------|
| 1     | 10,570    | 7592347  | 558030 | 0,000 | 50,547  |
| 2     | 15,275    | 7428137  | 375487 | 0,000 | 49,453  |
| Total |           | 15020484 | 933517 |       | 100,000 |

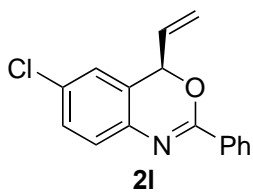

mAU

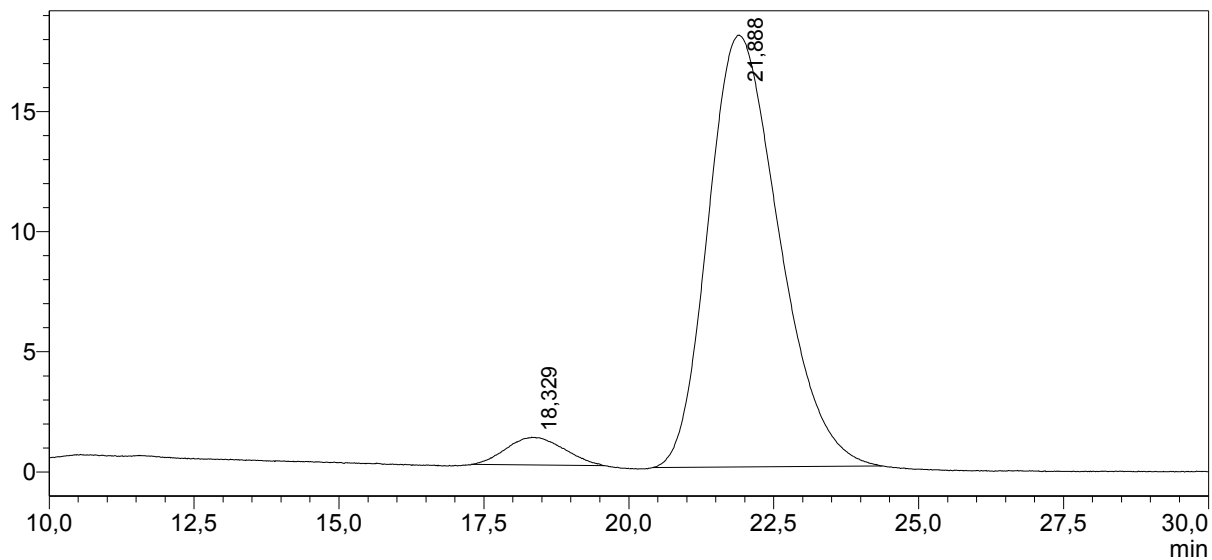

**<Peak Table>**

| Peak# | Ret. Time | Area    | Height | Conc. | Area%   |
|-------|-----------|---------|--------|-------|---------|
| 1     | 18,329    | 79752   | 1151   | 0,000 | 4,949   |
| 2     | 21,888    | 1531598 | 17970  | 0,000 | 95,051  |
| Total |           | 1611350 | 19121  |       | 100,000 |

mAU

Racemic mixture:

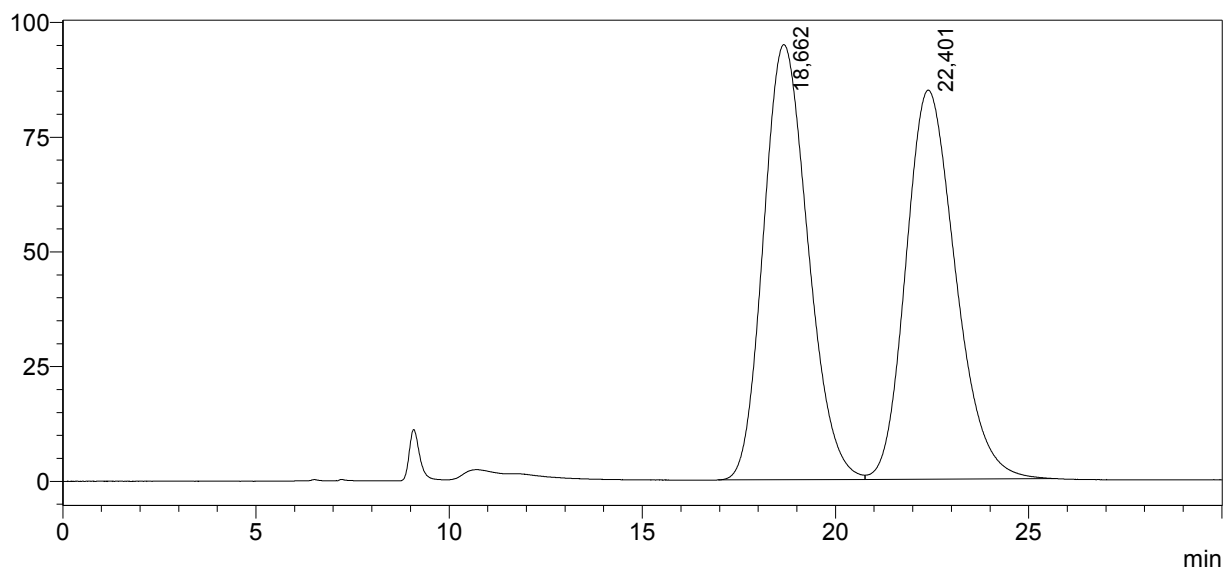

**<Peak Table>**

| Peak# | Ret. Time | Area     | Height | Conc. | Area%   |
|-------|-----------|----------|--------|-------|---------|
| 1     | 18,662    | 7608786  | 94844  | 0,000 | 50,095  |
| 2     | 22,401    | 7580061  | 84805  | 0,000 | 49,905  |
| Total |           | 15188846 | 179649 |       | 100,000 |

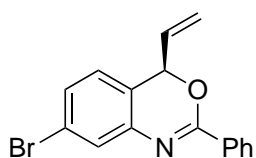

**2m**

mAU

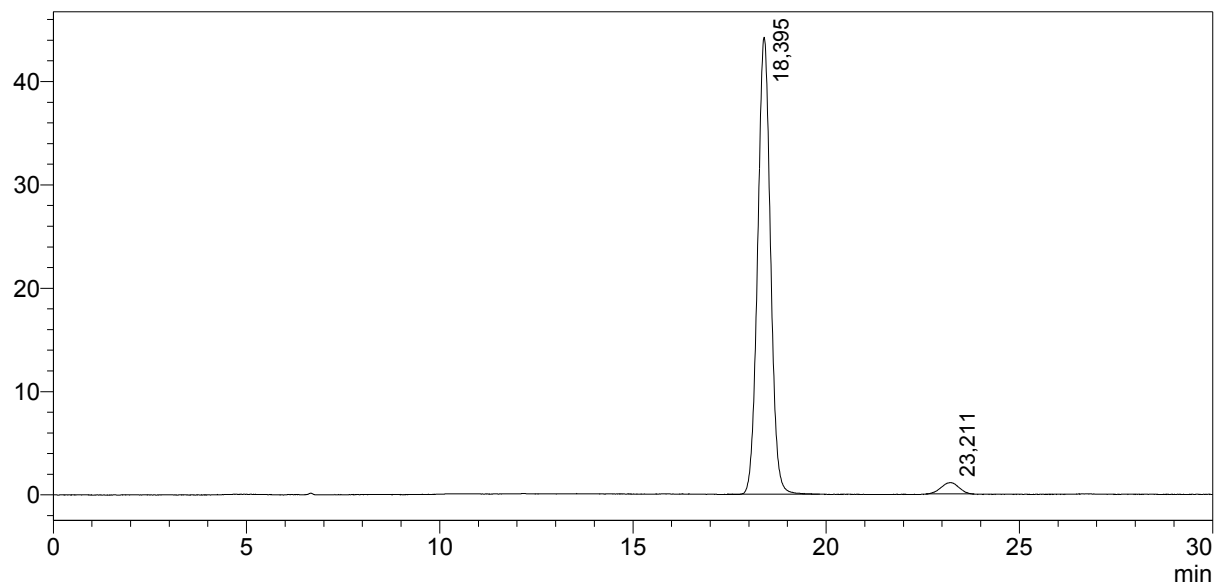

**<Peak Table>**

| Peak# | Ret. Time | Area    | Height | Conc. | Area%   |
|-------|-----------|---------|--------|-------|---------|
| 1     | 18,395    | 1021895 | 44211  | 0,000 | 96,663  |
| 2     | 23,211    | 35273   | 1101   | 0,000 | 3,337   |
| Total |           | 1057168 | 45313  |       | 100,000 |

mAU

Racemic mixture:

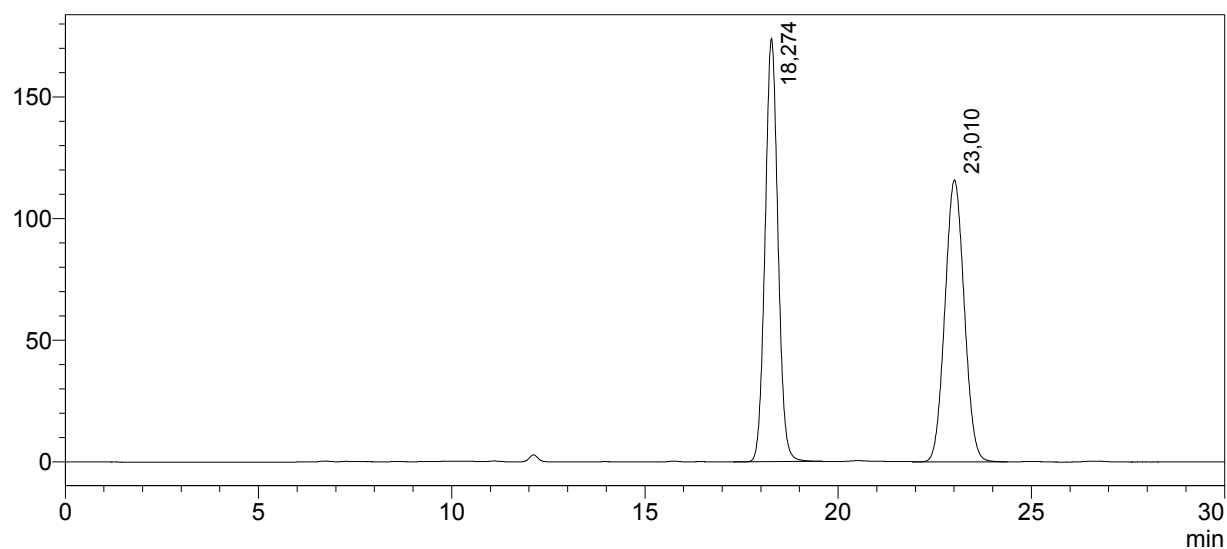

**<Peak Table>**

| Peak# | Ret. Time | Area    | Height | Conc. | Area%   |
|-------|-----------|---------|--------|-------|---------|
| 1     | 18,274    | 4028174 | 173979 | 0,000 | 50,062  |
| 2     | 23,010    | 4018149 | 115855 | 0,000 | 49,938  |
| Total |           | 8046323 | 289833 |       | 100,000 |

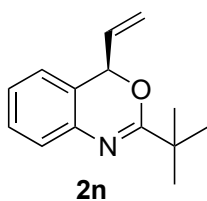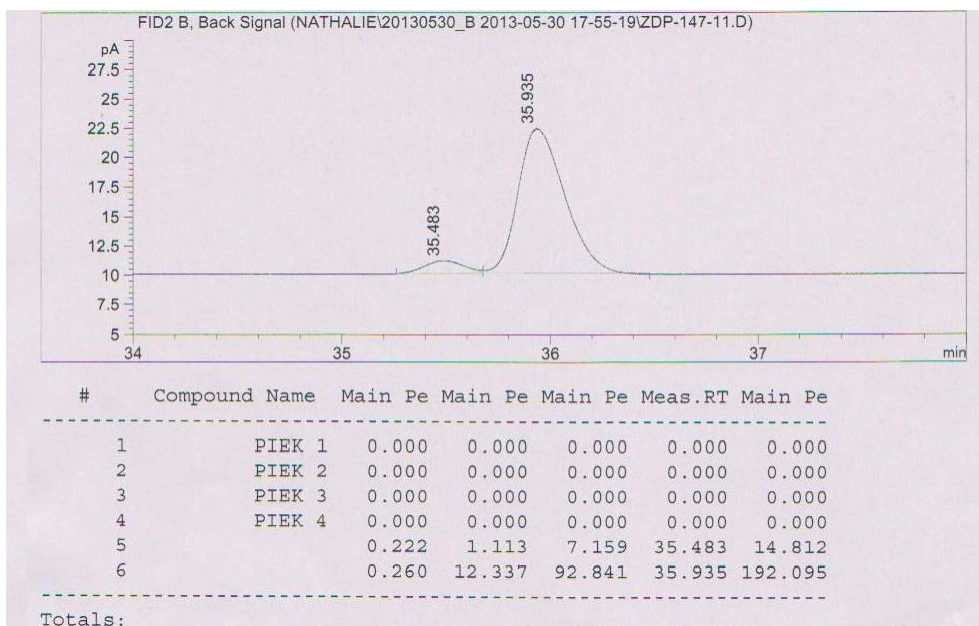

### Racemic mixture:

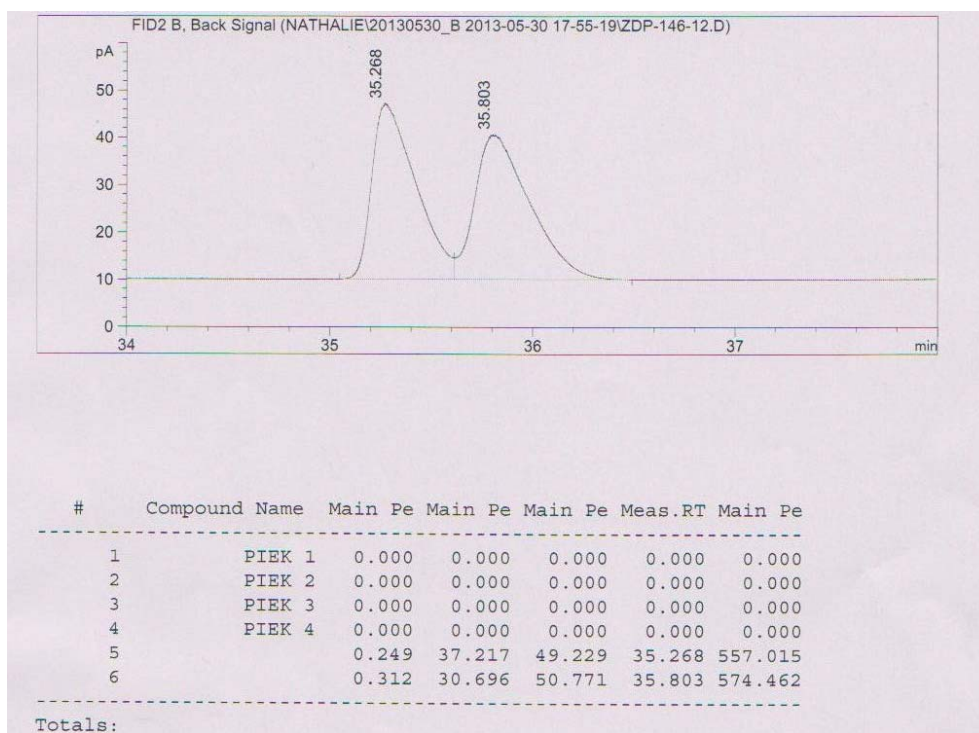

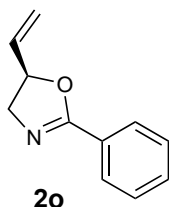

mAU

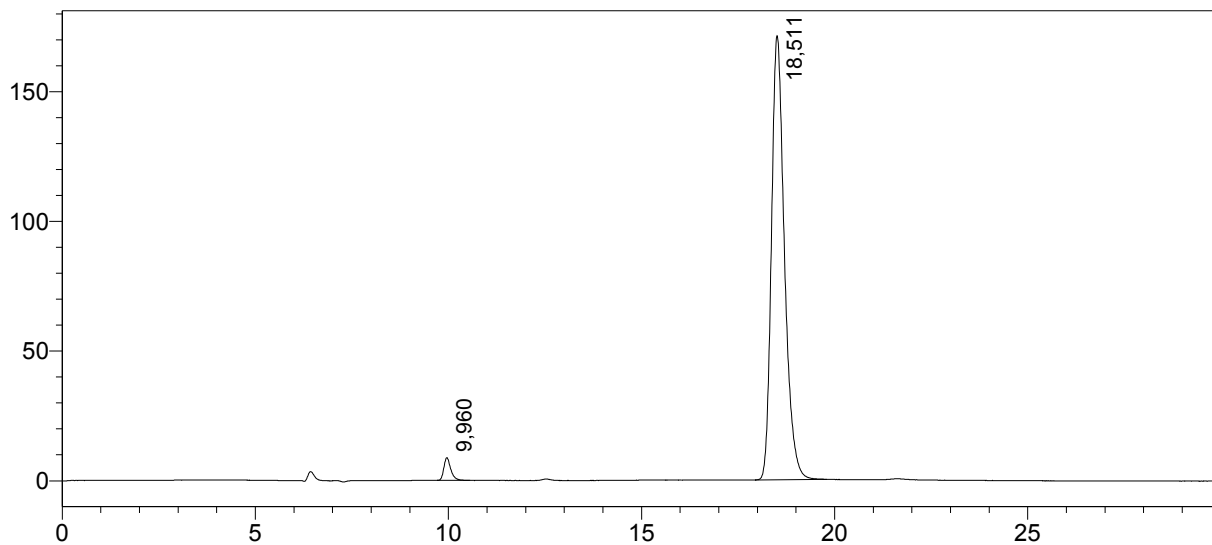

**<Peak Table>**

| Peak# | Ret. Time | Area    | Height | Conc. | Area%   |
|-------|-----------|---------|--------|-------|---------|
| 1     | 9,960     | 109722  | 8759   | 0,000 | 2,660   |
| 2     | 18,511    | 4014628 | 171201 | 0,000 | 97,340  |
| Total |           | 4124351 | 179960 |       | 100,000 |

mAU

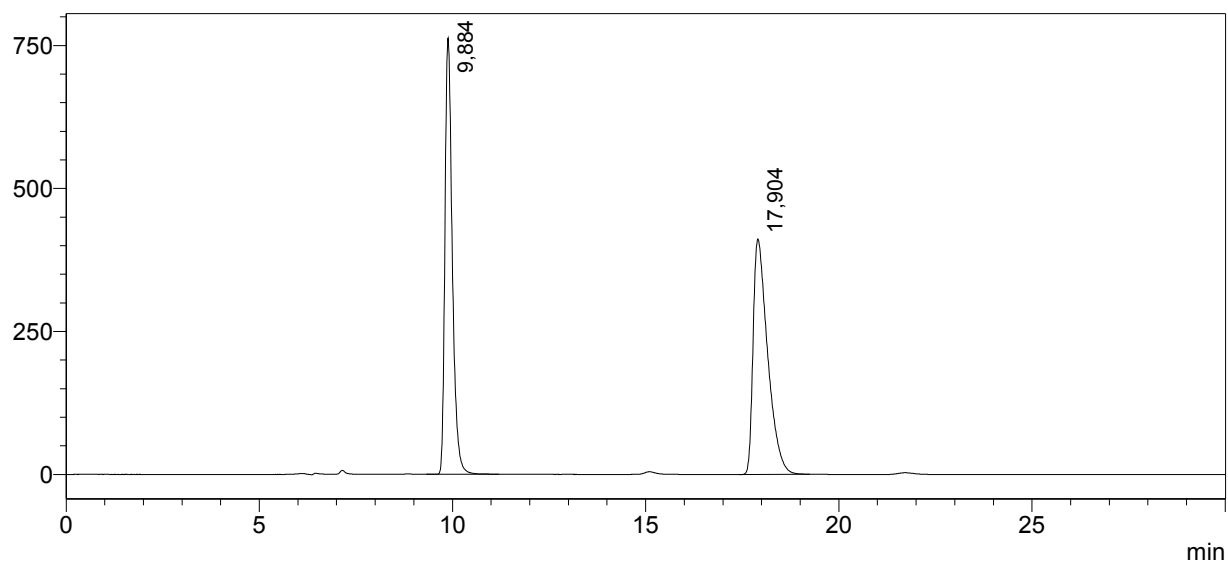

**<Peak Table>**

| Peak# | Ret. Time | Area     | Height  | Conc. | Area%  |
|-------|-----------|----------|---------|-------|--------|
| 1     | 9,884     | 10113248 | 762754  | 0,000 | 48,467 |
| 2     | 17,904    | 10752962 | 411477  | 0,000 | 51,533 |
| Total |           | 20866209 | 1174231 |       | 100,00 |

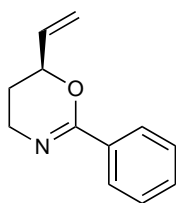

**2p**

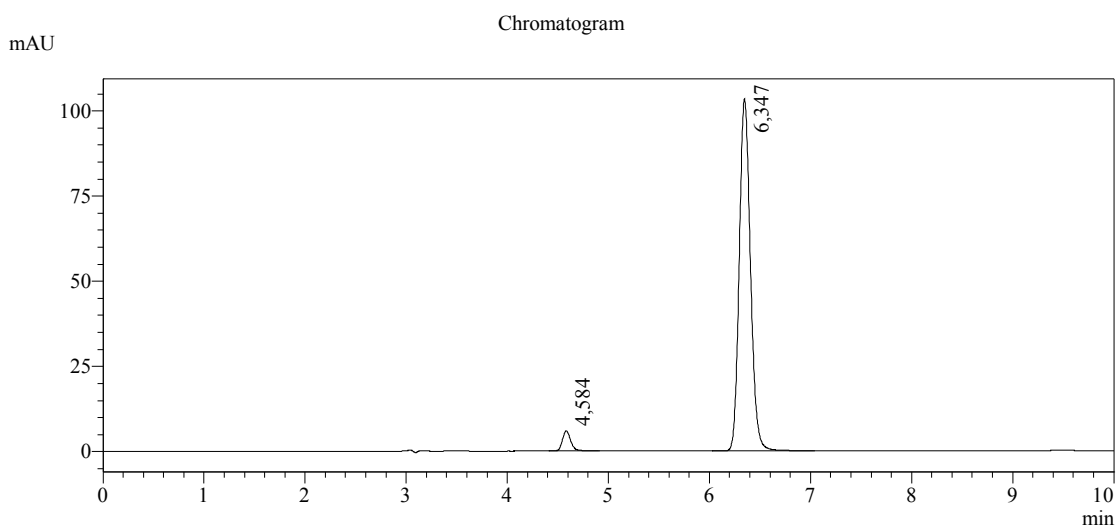

Peak Table

| Peak# | Ret. Time | Area   | Height | Conc. | Area%   |
|-------|-----------|--------|--------|-------|---------|
| 1     | 4.584     | 33695  | 5880   | 0,000 | 4,073   |
| 2     | 6.347     | 793654 | 103077 | 0,000 | 95,927  |
| Total |           | 827348 | 108957 |       | 100,000 |

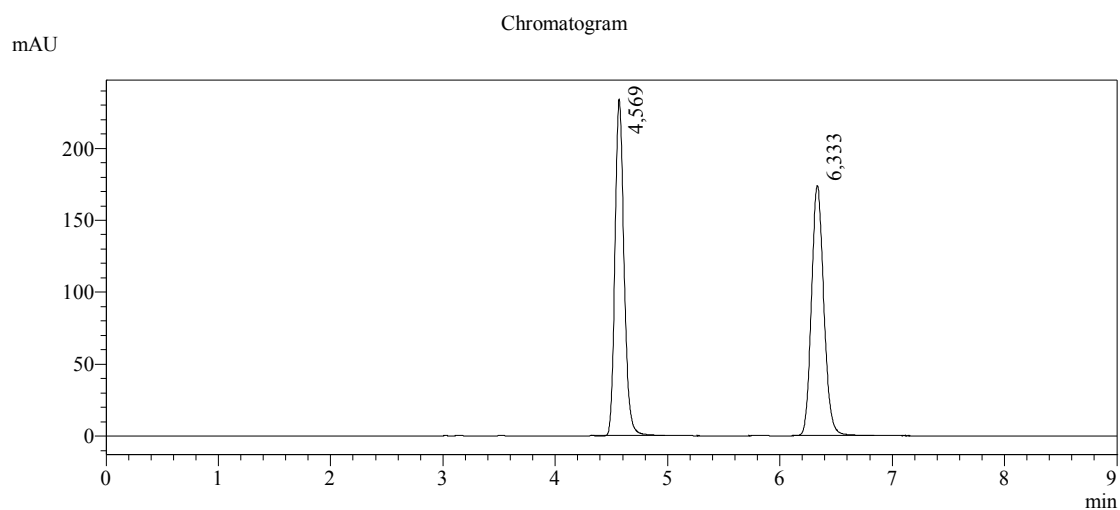

Peak Table

| Peak# | Ret. Time | Area    | Height | Conc. | Area%   |
|-------|-----------|---------|--------|-------|---------|
| 1     | 4.569     | 1312628 | 232328 | 0,000 | 49,734  |
| 2     | 6.333     | 1326650 | 173579 | 0,000 | 50,266  |
| Total |           | 2639278 | 405907 |       | 100,000 |

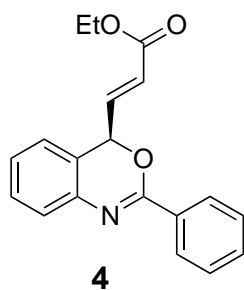

mAU

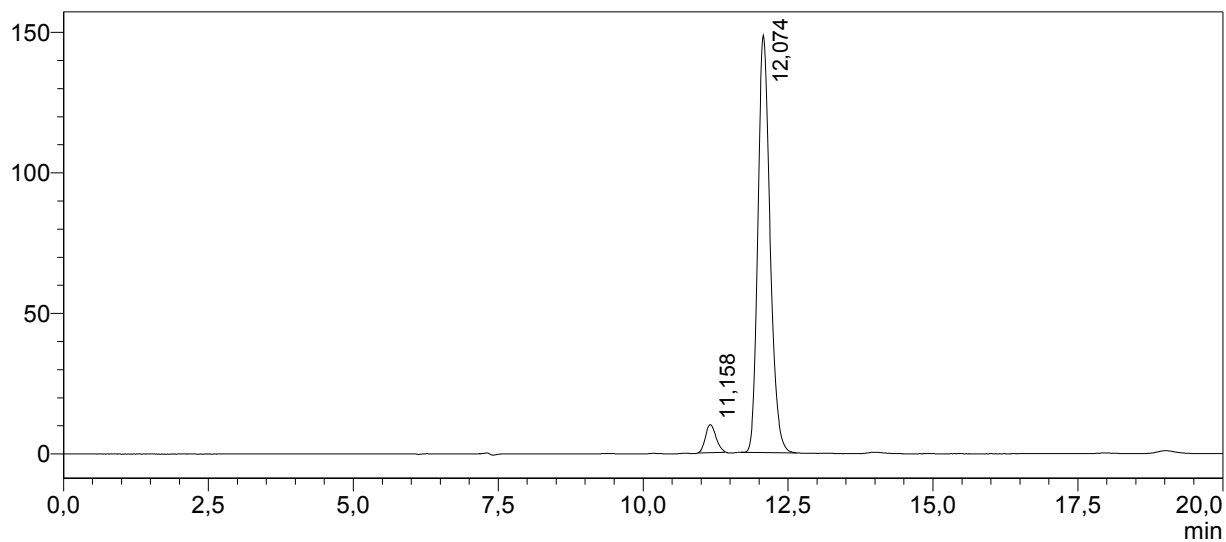

### <Peak Table>

| Peak# | Ret. Time | Area    | Height | Conc. | Area%   |
|-------|-----------|---------|--------|-------|---------|
| 1     | 11,158    | 118009  | 9564   | 0,000 | 5,166   |
| 2     | 12,074    | 2166551 | 148436 | 0,000 | 94,834  |
| Total |           | 2284561 | 158000 |       | 100,000 |

mAU

Racemic mixture:

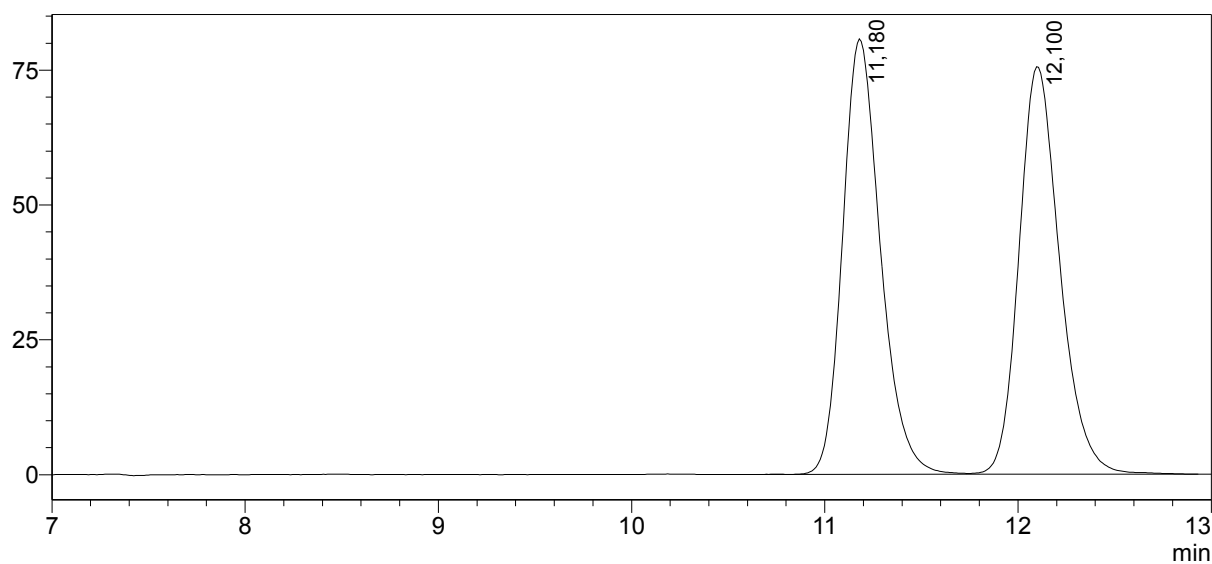

### <Peak Table>

| Peak# | Ret. Time | Area    | Height | Conc. | Area%   |
|-------|-----------|---------|--------|-------|---------|
| 1     | 11,180    | 1100178 | 80722  | 0,000 | 49,830  |
| 2     | 12,100    | 1107681 | 75540  | 0,000 | 50,170  |
| Total |           | 2207858 | 156263 |       | 100,000 |

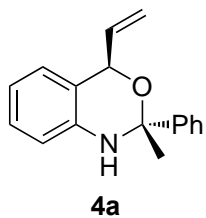

mAU

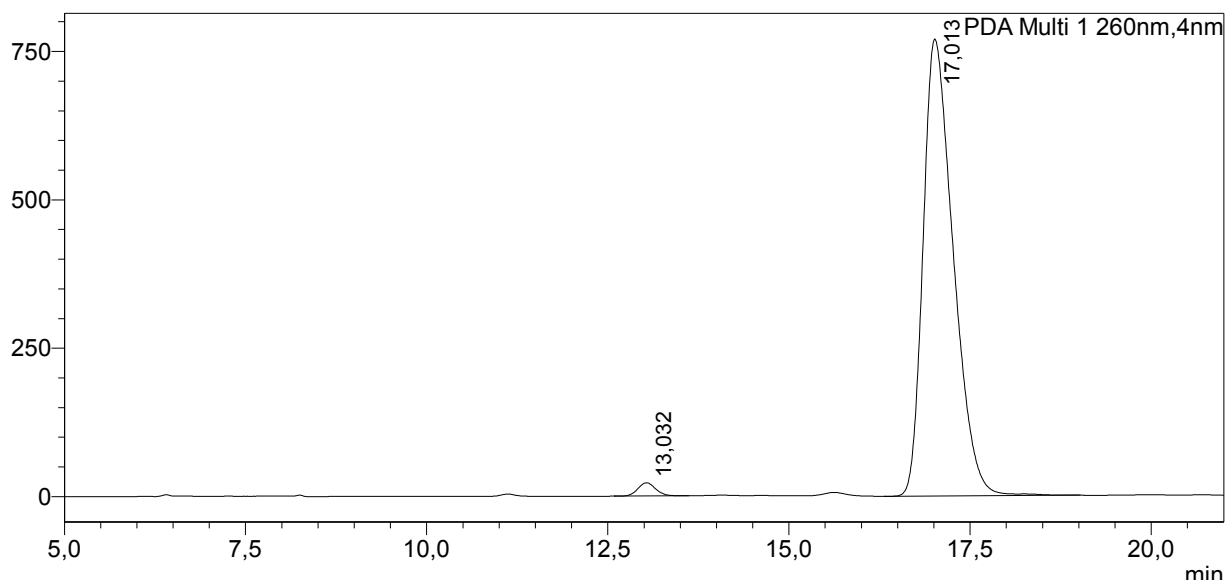

**<Peak Table>**

| Peak# | Ret. Time | Area     | Height | Conc. | Area%   |
|-------|-----------|----------|--------|-------|---------|
| 1     | 13,032    | 378233   | 22205  | 0,000 | 1,669   |
| 2     | 17,013    | 22286251 | 770040 | 0,000 | 98,331  |
| Total |           | 22664484 | 792244 |       | 100,000 |

mAU

Racemic mixture:

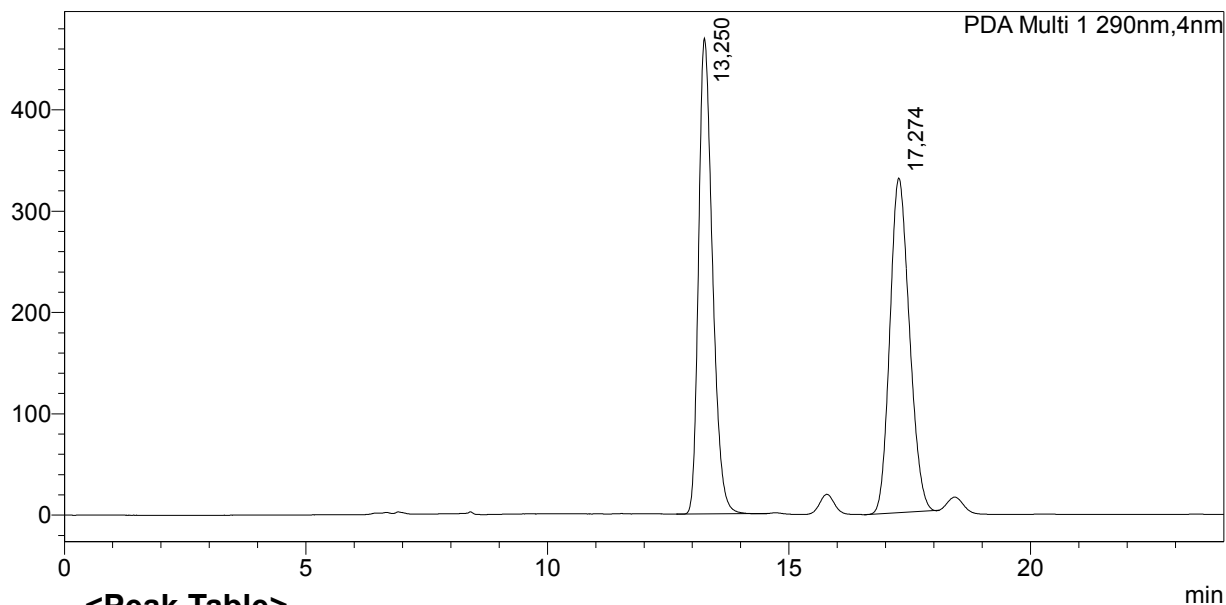

**<Peak Table>**

| Peak# | Ret. Time | Area     | Height | Conc. | Area%   |
|-------|-----------|----------|--------|-------|---------|
| 1     | 13,250    | 9365003  | 469565 | 0,000 | 50,196  |
| 2     | 17,274    | 9291971  | 330225 | 0,000 | 49,804  |
| Total |           | 18656974 | 799790 |       | 100,000 |
